# Supplementary material for: Epidemiological investigation of the first 5685 cases of SARS-CoV-2 infection in Qatar, 28 February–18 April 2020
Source: PubMed Central journal article supplement — BMJ Open. 2020 Oct 7;10(10):e040428. doi: 10.1136/bmjopen-2020-040428 (PMC7542927; doi:10.1136/bmjopen-2020-040428), 2020-10-07
Supplement: bmjopen-2020-040428.draft_revisions.pdf [file bmjopen-2020-040428.draft_revisions.pdf]

# BMJ Open

BMJ Open is committed to open peer review. As part of this commitment we make the peer review history of every article we publish publicly available.

When an article is published we post the peer reviewers' comments and the authors' responses online. We also post the versions of the paper that were used during peer review. These are the versions that the peer review comments apply to.

The versions of the paper that follow are the versions that were submitted during the peer review process. They are not the versions of record or the final published versions. They should not be cited or distributed as the published version of this manuscript.

BMJ Open is an open access journal and the full, final, typeset and author-corrected version of record of the manuscript is available on our site with no access controls, subscription charges or pay-per-view fees (<http://bmjopen.bmj.com>).

If you have any questions on BMJ Open's open peer review process please email [info.bmjopen@bmj.com](mailto:info.bmjopen@bmj.com)

# BMJ Open

## Characterization of the SARS-CoV-2 outbreak in the State of Qatar, February 28-April 18, 2020

|                               |                                                                                                                                                                                                                                                                                                                                                                                                                                                                                                                                                                                                                                                                                                                                                                                                                                                                                                                                                                                                                                                                                                                                                                                                                                                                                                                                                  |
|-------------------------------|--------------------------------------------------------------------------------------------------------------------------------------------------------------------------------------------------------------------------------------------------------------------------------------------------------------------------------------------------------------------------------------------------------------------------------------------------------------------------------------------------------------------------------------------------------------------------------------------------------------------------------------------------------------------------------------------------------------------------------------------------------------------------------------------------------------------------------------------------------------------------------------------------------------------------------------------------------------------------------------------------------------------------------------------------------------------------------------------------------------------------------------------------------------------------------------------------------------------------------------------------------------------------------------------------------------------------------------------------|
| Journal:                      | <i>BMJ Open</i>                                                                                                                                                                                                                                                                                                                                                                                                                                                                                                                                                                                                                                                                                                                                                                                                                                                                                                                                                                                                                                                                                                                                                                                                                                                                                                                                  |
| Manuscript ID                 | bmjopen-2020-040428                                                                                                                                                                                                                                                                                                                                                                                                                                                                                                                                                                                                                                                                                                                                                                                                                                                                                                                                                                                                                                                                                                                                                                                                                                                                                                                              |
| Article Type:                 | Original research                                                                                                                                                                                                                                                                                                                                                                                                                                                                                                                                                                                                                                                                                                                                                                                                                                                                                                                                                                                                                                                                                                                                                                                                                                                                                                                                |
| Date Submitted by the Author: | 14-May-2020                                                                                                                                                                                                                                                                                                                                                                                                                                                                                                                                                                                                                                                                                                                                                                                                                                                                                                                                                                                                                                                                                                                                                                                                                                                                                                                                      |
| Complete List of Authors:     | <p>Al Kuwari, Hanan; Ministry of Public Health Qatar, Office of the Minister of Public Health<br/> Abdul Rahim, Hanan; Qatar University, College of Health Sciences<br/> Abu-Raddad, Laith; Healthcare policy and research<br/> Abou-Samra, Abdul-Badi ; Hamad Medical Corporation, Department of Medicine<br/> Al Kanaani, Zaina; Hamad Medical Corporation, Business Intelligence Unit<br/> Al Khal, Abdullatif; Hamad Medical Corporation, Department of Medicine<br/> Al Kuwari, Einas; Hamad Medical Corporation, Department of Laboratory Medicine<br/> Al Marri, salih; Ministry of Public Health Qatar, Office of the Minister of Public Health<br/> Al Masalmani, Muna; Hamad Medical Corporation, Department of Medicine<br/> Al Romaihi, Hamad; Ministry of Public Health Qatar, Office of the Minister of Public Health<br/> Al Thani, Mohammed; Ministry of Public Health Qatar, Office of the Minister of Public Health<br/> Coyle, Peter; Hamad Medical Corporation, Department of Laboratory Medicine<br/> Latif, Ali; Hamad Medical Corporation, Business Intelligence Unit<br/> Owen, Robert; Hamad Medical Corporation, National Ambulance Service<br/> Bertollini, Roberto; Ministry of Public Health Qatar, Office of the Minister of Public Health<br/> Butt, Adeel; Hamad Medical Corporation, Department of Medicine</p> |
| Keywords:                     | Public health < INFECTIOUS DISEASES, Epidemiology < INFECTIOUS DISEASES, PUBLIC HEALTH                                                                                                                                                                                                                                                                                                                                                                                                                                                                                                                                                                                                                                                                                                                                                                                                                                                                                                                                                                                                                                                                                                                                                                                                                                                           |
|                               |                                                                                                                                                                                                                                                                                                                                                                                                                                                                                                                                                                                                                                                                                                                                                                                                                                                                                                                                                                                                                                                                                                                                                                                                                                                                                                                                                  |

SCHOLARONE™  
Manuscripts

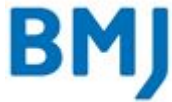

I, the Submitting Author has the right to grant and does grant on behalf of all authors of the Work (as defined in the below author licence), an exclusive licence and/or a non-exclusive licence for contributions from authors who are: i) UK Crown employees; ii) where BMJ has agreed a CC-BY licence shall apply, and/or iii) in accordance with the terms applicable for US Federal Government officers or employees acting as part of their official duties; on a worldwide, perpetual, irrevocable, royalty-free basis to BMJ Publishing Group Ltd ("BMJ") its licensees and where the relevant Journal is co-owned by BMJ to the co-owners of the Journal, to publish the Work in this journal and any other BMJ products and to exploit all rights, as set out in our [licence](#).

The Submitting Author accepts and understands that any supply made under these terms is made by BMJ to the Submitting Author unless you are acting as an employee on behalf of your employer or a postgraduate student of an affiliated institution which is paying any applicable article publishing charge ("APC") for Open Access articles. Where the Submitting Author wishes to make the Work available on an Open Access basis (and intends to pay the relevant APC), the terms of reuse of such Open Access shall be governed by a Creative Commons licence – details of these licences and which [Creative Commons](#) licence will apply to this Work are set out in our licence referred to above.

Other than as permitted in any relevant BMJ Author's Self Archiving Policies, I confirm this Work has not been accepted for publication elsewhere, is not being considered for publication elsewhere and does not duplicate material already published. I confirm all authors consent to publication of this Work and authorise the granting of this licence.

1  
2  
3 **Characterization of the SARS-CoV-2 outbreak in the State of Qatar,**  
4  
5  
6 **February 28-April 18, 2020**  
7  
8  
9

10 Hanan M. Al Kuwari, PhD<sup>1</sup>

11 Hanan F. Abdul Rahim, PhD<sup>2</sup>

12 Laith J. Abu Raddad, PhD<sup>3</sup>

13 Abdul-Badi Abou-Samra, MD, PhD<sup>4</sup>

14 Zaina Al Kanaani, MPH, PhD<sup>5</sup>

15 Abdullatif Al Khal, MD<sup>4</sup>

16 Einas Al Kuwari, MD<sup>6</sup>

17 Salih Al Marri, MD<sup>1</sup>

18 Muna Al Masalmani, MD<sup>4</sup>

19 Hamad Eid Al Romaihi, MD<sup>1</sup>

20 Sheikh Mohammed Al Thani, MD, MPH<sup>1</sup>

21 Peter Coyle, MD<sup>6</sup>

22 Ali Nizar Latif, MBBS, MPH<sup>5</sup>

23 Robert Owen, MD<sup>7</sup>

24 **Roberto Bertollini, MD, MPH<sup>1</sup>**

25 **Adeel A. Butt, MBBS, MS<sup>4,8</sup>**

26  
27  
28  
29  
30  
31  
32  
33  
34  
35  
36  
37  
38  
39  
40  
41  
42  
43  
44  
45  
46 Author affiliations:

47  
48 1 Office of the Minister of Public Health, Ministry of Public Health, Doha, Qatar

49 2 College of Health Sciences, QU Health, Qatar University, Doha, Qatar

50  
51 3 Infectious Disease Epidemiology Group, Weill Cornell Medicine-Qatar, Cornell University,  
52  
53 Doha, Qatar  
54  
55  
56  
57  
58  
59  
60

1  
2  
3 4 Department of Medicine, Hamad Medical Corporation, Doha, Qatar

4 5 Business Intelligence Unit, Hamad Medical Corporation, Doha, Qatar

5 6 Department of Laboratory Medicine, Hamad Medical Corporation, Doha

6 7 National Ambulance Service, Hamad Medical Corporation, Doha, Qatar

7 8 Department of Medicine, Weill Cornell Medical College, New York, USA and Doha, Qatar

8 9  
9 10  
10 11  
11 12  
12 13  
13 14  
14 15  
15 16 Address all correspondence to:

Alternate corresponding author:

16 17 Professor Adeel A. Butt

Professor Roberto Bertollini

17 18 Department of Medicine

Ministry of Public Health

18 19 Hamad Medical Corporation

PO Box 42

19 20 PO Box 3050, Doha, Qatar

Doha, Qatar

20 21 E-mail: aabutt@hamad.qa

21 22  
22 23  
23 24  
24 25  
25 26  
26 27  
27 28  
28 29  
29 30  
30 31 Word count: 2,497;

Abstract word count: 241

31 32 Tables: 5;

Figures: 2

32 33  
33 34  
34 35  
35 36  
36 37 Contributorship Statement:

37 38 Drafting of the manuscript: HMAK; HFAR; LJAR; RB; AAB;

38 39 Data acquisition: AAB; AAK; SMAT; ANL; ZAK; SAM; HEA; RO; MAM; SAK;

39 40 Laboratory testing and reporting: EAK; PC;

40 41 Study design: HMAK; HFAR; LJAR; RB; AAB;

41 42 Data analysis: AAB;

42 43 Data interpretation: HMAK; AAB; HFAR; LJAR; RB;

43 44 Critical appraisal and review: All authors

44 45  
45 46  
46 47  
47 48  
48 49  
49 50  
50 51  
51 52  
52 53  
53 54  
54 55  
55 56 Key words: SARS-CoV-2; COVID-19; Qatar; epidemiology;

1  
2  
3 **Funding**  
4

5 None  
6  
7  
8  
9  
10  
11  
12  
13  
14  
15  
16  
17  
18  
19  
20  
21  
22  
23  
24  
25  
26  
27  
28  
29  
30  
31  
32  
33  
34  
35  
36  
37  
38  
39  
40  
41  
42  
43  
44  
45  
46  
47  
48  
49  
50  
51  
52  
53  
54  
55  
56  
57  
58  
59  
60

For peer review only

## Abstract

### Objective

To define the epidemiologic curve of COVID-19 in Qatar, determine factors associated with severe or critical illness, and study the temporal relation between public health measures and case finding

### Design

Epidemiologic investigation

### Setting and Participants

All confirmed COVID-19 cases in the State of Qatar between February 28 and April 18, 2020

### Main Outcome Measures

Number of total and daily new COVID-19 infections; demographic characteristics and comorbidity burden and severity of infection; factors associated with severe or critical illness

### Results

Between February 28 and April 18, 2020 (11:00AM local time), 5,685 cases of COVID-19 were identified. Mean age (SD) was 35.8(12.0) years, 88.9% were male and 8.7% were Qatari nationals. Overall, 83.6% had no concomitant comorbidity, and 3.0% had 3 or more comorbidities. The overwhelming majority (90.9%) were asymptomatic or with minimal symptoms, with 2.0% having severe or critical illness. Presence of hypertension or diabetes were associated with a higher risk of severe or critical illness. Seven deaths were observed during the time interval studied. The epidemiologic curve indicated two distinct patterns of

1  
2  
3 infection, a larger cluster among expatriate craft and manual workers, and a smaller one among  
4  
5 Qatari nationals returning from abroad during the epidemic.  
6  
7

## 8 9 **Conclusion**

10  
11 COVID-19 infections in Qatar started in two distinct clusters, but then became more widespread  
12  
13 in the population through community transmission. Infections were mostly asymptomatic or with  
14  
15 minimal symptoms and associated with very low mortality. Severe/critical illness was associated  
16  
17 with presence of hypertension or diabetes.  
18  
19  
20  
21  
22  
23  
24  
25

### 26 **Article Summary**

27  
28 Strengths and limitations of this study:

- 29  
30 • National study with unified contact tracing and testing
- 31  
32 • All testing done at a single lab, and all tests performed in the State of Qatar during the  
33  
34 study period were included, providing a robust national estimate of the number of  
35  
36 infected persons among those tested
- 37  
38 • Comorbidities were retrieved from the electronic medical records using ICD-10 AM  
39  
40 codes
- 41  
42 • Exact geographic location and contact tracing data were not included in the current  
43  
44 report
- 45  
46 • It is possible that some persons still under care on the study end date may have  
47  
48 progressed to more severe disease after that date  
49  
50  
51  
52  
53  
54  
55  
56  
57  
58  
59  
60



**What is already known on this topic**

As of May 3, 2020, over 3.4 million persons have been infected with SARS-CoV-2 and over 244,000 deaths have been reported in persons with COVID-19 infection. Those at higher risk of complications include persons over age 60 years and those with chronic comorbid conditions. Mortality rate varies widely among different countries, and this can be associated both to the capacity of the health system to provide effective intensive care including ventilators as well as other factors, including demographic differences. Public health measures seem effective, but there is debate on the extent to which the measures need to be aggressive or the duration for which they should be implemented.

**What this study adds**

This study reports on the epidemic curve in a population with a unique demographic structure, comprising an overwhelming majority of expatriates and young male craft and manual workers. This is also the first study that reports on the epidemic curve of an Arab country in the Eastern Mediterranean Region (EMR). The study also overlays major public health measures on the epidemic curve, to provide an understanding of the context in which the epidemic is progressing. Patients with confirmed COVID-19 in Qatar were young with few comorbidities. Case fatality rate was very low (only 7 deaths among 5,685 infected persons). Severe and critical illness were associated with presence of hypertension or diabetes.

## Introduction

A cluster of patients with pneumonia of unknown etiology linked to a seafood wholesale market was first reported from Wuhan, China in December 2019.<sup>1-4</sup> A novel coronavirus, SARS-CoV-2 was isolated as the causative organism and the resultant disease was named COVID-19.<sup>1,5</sup> Initially linked to the seafood market and presumed to be transmitted from animals to humans, the virus has since spread quickly across the globe through human-to-human transmission.<sup>6-9</sup> As of May 3, 2020, more than 3.4 million cases and over 244,000 deaths have been reported globally. Published epidemiologic studies across a number of populations show significant differences in rates and severity of infection and in case fatality rates.<sup>10</sup> At this stage of a novel virus pandemic, analyzing transmission patterns in populations with unique demographic characteristics can add to our understanding of the disease dynamics. While it is difficult to isolate the effects of public health measures, such as quarantine, lockdown, and physical distancing, it is nevertheless useful to track the course of the epidemic in relation to the timeline of their implementation. We describe the demographic characteristics, comorbidity profile, and disease severity of patients with confirmed COVID-19 infection in Qatar. We also report on significant public health measures implemented to slow the progression of the epidemic in Qatar.

Qatar is a part of the six-country Gulf Cooperation Council, which also includes Saudi Arabia, Kuwait, Oman, Bahrain and the United Arab Emirates. Qatar has a unique population demographic profile. Among the 2.8 million residents of Qatar, expatriate workforce constitutes about 88% of the population.<sup>11</sup> Due to the nature of the expatriate workforce, the majority of the population in Qatar (~75%) are male, and the population pyramid is heavily concentrated in the 20-50 year age groups, particularly among males.<sup>11</sup> There is evidence that COVID-19 disproportionately affects males and outcomes are poorer in the older age group.<sup>3,12,13</sup> Understanding the epidemiologic curve and risk factors for serious infection in Qatar will be

1  
2  
3 important in understanding the epidemiology in countries with unique demographic  
4 characteristics.  
5  
6

## 7 8 9 **Methods**

10 Even before the first case of COVID-19 was identified in the country, Qatar had instituted  
11 extensive plans to identify and manage persons with COVID-19 infection. The existing tracking,  
12 tracing and identification mechanism within the Ministry of Public Health, with proven  
13 effectiveness during the MERS-CoV outbreak, was expanded and put on alert.<sup>14,15</sup> Testing for  
14 suspected cases started on February 5, 2020, and the first case was recorded on February 28,  
15 2020. We used the tracking and reporting data from the Ministry of Public Health to determine  
16 the number of new cases diagnosed per day and their demographic characteristics between  
17 February 28, 2020 (date of identification of first case in Qatar) and April 18, 2020 (11:00 AM  
18 local time). All COVID-19 testing in Qatar was performed at the central laboratory of Hamad  
19 Medical Corporation, which is the public healthcare delivery arm for the State of Qatar and  
20 provides over 85% of the inpatient bed capacity in the State. Nasopharyngeal and throat swabs  
21 were collected from suspected cases with symptoms of influenza-like illness suggesting COVID-  
22 19 and, if confirmed, from close contacts. Real time RT-PCR was used to detect SARS-CoV-2  
23 infection. Nationality of each tested person was ascertained from the official State Identification  
24 Card, which is issued to each national and expatriate worker and their dependents residing in  
25 Qatar. Comorbidities were retrieved from the electronic medical records where they are coded  
26 using the International Classification of Diseases 10<sup>th</sup> edition, Australian Modification. Severity  
27 of illness at the time of presentation was determined by expert coders using criteria suggested  
28 by the World Health Organization, including admission to an acute care or an intensive care  
29 bed, need for mechanical ventilation, oxygen saturation and supplemental oxygen  
30 requirement.<sup>16</sup> **(Supplementary table 1)** Severity of illness was categorized into 1)  
31 asymptomatic or minimal symptoms, 2) mild symptoms or uncomplicated upper respiratory tract  
32  
33  
34  
35  
36  
37  
38  
39  
40  
41  
42  
43  
44  
45  
46  
47  
48  
49  
50  
51  
52  
53  
54  
55  
56  
57  
58  
59  
60

1  
2  
3 infection without clinical or radiographic evidence of pneumonia, 3) mild symptoms with clinical  
4 or radiographic evidence of pneumonia, 4) severely ill, and 5) critically ill.<sup>16</sup>  
5  
6  
7

8  
9 We created a timeline of newly diagnosed cases to study the progression of the epidemic in  
10 Qatar. Key governmental decisions taken by the Supreme Committee for Crisis Management  
11 and the Council of Ministers in response to the epidemic were marked on the timeline to show  
12 their temporal relation to the cases. Multivariable logistic regression was used to determine  
13 factors associated with severe and critical illness. Covariates of interest included in the model  
14 were age, gender, nationality and presence of comorbidities. Comorbidities with a total count of  
15 less than 15 were excluded because of the small numbers.  
16  
17  
18  
19  
20  
21  
22  
23  
24  
25

26 Changes in population movement was assessed using Google mobility reports, a publicly  
27 available tool that tracks movement of people who use mobile applications like Google Maps.<sup>17</sup>  
28 They show changes in visits and length of stay at various locations compared to a baseline.  
29 Baseline was the median value, for the corresponding day of the week, during the 5-week  
30 period between January 3, 2020 and February 6, 2020.<sup>17</sup>  
31  
32  
33  
34  
35  
36  
37  
38

### 39 *Ethical Approval*

40  
41 The Institutional Review Board at Hamad Medical Corporation approved this study with an  
42 expedited status due to the emergency pandemic status of the COVID-19 outbreak.  
43  
44  
45  
46

### 47 *Patient and Public Involvement*

48  
49 This study was conducted in response to a national and global public health emergency. There  
50 was no patient or public involvement. However, key elements of the data are shared with the  
51 public on a daily basis.  
52  
53  
54  
55  
56  
57  
58  
59  
60

## Results

Between February 5, 2020 and April 18, 2020 (11:00 AM local time), 60,645 persons were tested for SARS-CoV-2, of which 5,685 were confirmed positive. Before the first case was diagnosed, testing for SARS-CoV-2 focused on those with influenza-like illness and severe acute respiratory infection. The first cases were identified among quarantined travelers returning to Qatar on February 28, 2020, followed by the identification of a large cluster of over 300 infections on March 6, 2020 among expatriate craft and manual workers. Following the discovery of the first community cluster, testing was expanded to include contacts of new cases, persons in hotspots, that is areas where infections were diagnosed, individuals with suspected infection or suggestive symptoms, and travelers coming or returning to Doha. The rapid expansion of testing created a backlog, which was resolved through an investment in testing infrastructure that significantly increased the testing capacity to approximately 4,000 tests per day.

The number of new cases diagnosed by date of diagnosis is presented in **figure 1**. The epidemiologic curve showed two distinct patterns of infection transmission. A larger and sustained community transmission was observed among expatriate workers, predominantly among craft and manual workers, which subsequently reached other population segments. A second smaller cluster among Qatari nationals returning from overseas during the study period was not sustained over time. Subsequent smaller case clusters among Qatari nationals were traced to the local community. The number of tests performed per day and the number testing positive is provided in **supplementary figure 1**. The positivity rate, that is number of tests positive over total number of tests, is shown in **figure 2**. The positivity rate increased steadily with time, with somewhat of an accelerated rate after April 5, 2020.

1  
2  
3 The mean age (SD) of the infected persons was 35.8 (12.0) years and 88.9% were male (**Table**  
4 **1**). Other baseline characteristics are also shown in **table 1**. The nationalities with highest  
5 frequency of infection were Indian (27.4%), Bangladeshi (18.9%), Nepalese (18.4%), Qatari  
6 (8.7%), and Pakistani (6.2%). The most common comorbidities were hypertension (6.9%),  
7 diabetes mellitus (6.0%), cardiovascular disease (4.4%) and chronic lung disease (3.0%).  
8 Comorbidity data were missing for 235 persons (4.1%). Among all infected persons, 4,753  
9 (83.6%) had no known comorbidity and 697 (12.3%) had at least one comorbidity. An  
10 overwhelming majority of infected persons (90.9%) were either asymptomatic or had minimal  
11 symptoms, 0.8% had mild illness without evidence of pneumonia, 2.3% had mild illness with  
12 pneumonia, and 2% were severe or critically ill. Severity of illness data were missing for 223  
13 (3.9%) persons. (**Table 1**)

14  
15  
16  
17  
18  
19  
20  
21  
22  
23  
24  
25  
26  
27  
28 A larger proportion of persons with mild illness with or without pneumonia and those with severe  
29 or critical illness had at least one comorbidity. (**Table 2**) Compared to those with asymptomatic  
30 or minimally symptomatic illness, prevalence of most comorbidities was 3-4 times higher among  
31 those with mild disease with or without pneumonia or severe/critical illness. Number of  
32 comorbidities by severity of illness is shown in **table 3**. Among persons with no comorbidity,  
33 96.1% were asymptomatic or had minimal symptoms, 2.5% had mild illness with or without  
34 pneumonia, and 1.4% were severely or critical ill. Among persons with 2 or more comorbidities,  
35 82.1% were asymptomatic or had minimal symptoms, 10.9% had mild illness with or without  
36 pneumonia, and 7.1% were severely or critical ill. (**Table 3**)

37  
38  
39  
40  
41  
42  
43  
44  
45  
46  
47  
48  
49  
50 Seven deaths were observed during the time interval studied, corresponding to a case-fatality  
51 rate of 1.2 per 1000 cases. All seven deaths were males aged 40-88 years. All except one (74  
52 years old male) had comorbidities, including diabetes (5 subjects), cardiovascular disease (5  
53 subjects) and hypertension (3 subjects). One patient, 58 years old had 5 comorbidities

1  
2  
3 (diabetes, hypertension, cardiovascular disease, chronic kidney and liver disease). In a  
4 multivariable logistic regression model, presence of hypertension (OR 3.49; 95% CI 1.83,6.68)  
5 or diabetes (OR 3.17; 95% CI 1.76,5.71) were associated with a higher risk of severe or critical  
6 disease. **(Table 4)** Cardiovascular disease, chronic lung disease, chronic kidney disease and  
7 solid organ malignancy were not associated with a higher risk. We repeated the logistic  
8 regression analysis after excluding those with missing data and the results were nearly identical.  
9  
10 **(Supplementary table 2)** We also repeated the analysis using number of comorbidities as  
11 covariates. Presence of any single comorbidity (OR 5.43, 95% CI 3.41,8.63) or any 3 or more  
12 comorbidities (OR 6.16, 95% CI 3.35,11.32) were associated with a higher risk of severe or  
13 critical illness. **(Supplementary table 3)**

14  
15  
16  
17  
18  
19  
20  
21  
22  
23  
24  
25  
26 Google mobility reports data demonstrated a significant decrease in number of people visiting  
27 retail and recreation outlets, grocery and pharmacy stores, parks, transit stations and  
28 workplaces over time. **(Table 5)** A concurrent increase in people staying in residential areas  
29 was observed over this timeframe. A snapshot on April 17 shows a 69% reduction in visits to  
30 retail and recreation areas, a 44% reduction in visits to grocery and pharmacy stores, a 64%  
31 decrease in visits to parks, a 68% decrease in visits to transit stations and a 38% decrease in  
32 visits to workplaces. A 21% increase in people at residential areas was observed on this date.

## 33 34 35 36 37 38 39 40 41 42 43 **Discussion**

44  
45 We provide a characterization of the SARS-CoV-2 outbreak in Qatar, which offers new insights  
46 into the behavior of the pandemic in a unique demographic setting.  
47  
48  
49  
50

51 The first case in Qatar was identified on February 28, 2020, among returning travelers, which is  
52 nearly 9 weeks after the first cluster was reported from Wuhan, China.<sup>18</sup> During this time,  
53 infection had spread to multiple countries over four continents. This was also a critical time  
54  
55  
56  
57  
58  
59  
60

1  
2  
3 during which the State of Qatar formulated a national plan to respond to the anticipated cases.  
4  
5 Testing for SARS-CoV-2 started in Qatar on February 5, 2020 and the first major cluster of  
6  
7 cases was identified on March 8, 2020 where over 300 cases were linked to 4 expatriate  
8  
9 workers through aggressive contact tracing. Such aggressive identification and contact tracing  
10  
11 and testing were probably the reasons for a small number of daily new cases till March 31,  
12  
13 2020. At that time, a large number of returning travelers and nationals were identified to have  
14  
15 infection. The number of daily diagnosed infections accelerated in April, in part due to a large  
16  
17 increase in number of daily tests, but also reflecting expansion of the epidemic in the wider  
18  
19 population. This trend occurred predominantly in expatriate workers often living in more  
20  
21 crowded areas and accommodations with frequent social mixing despite a national campaign to  
22  
23 discourage peoples' movement except in urgent situations. The epidemic, however, eventually  
24  
25 reached a larger population.  
26  
27  
28  
29

30  
31 An overwhelming majority (>90%) of confirmed COVID-19 cases were asymptomatic or with  
32  
33 minimal symptoms not requiring urgent medical care or hospitalization. This is likely due to the  
34  
35 younger age of the population (mean age 35.8 years) and overall absence of any comorbidities  
36  
37 in the vast majority of the infected persons. This reinforces our current understanding of the  
38  
39 disease being mild or asymptomatic in a majority of the persons, particularly among the younger  
40  
41 and healthier persons, as well as the strong role of age in the epidemiology of this infection.  
42  
43 Similar to other studies, presence of comorbidities was associated with severe or critical  
44  
45 disease.<sup>1</sup> We found a very low mortality among confirmed COVID-19 patients in Qatar, which  
46  
47 may at least partly be attributable both to the timely and effective response of the health system  
48  
49 and the demographic characteristics of the infected persons. It is conceivable that right  
50  
51 censoring with the time delay between onset of disease to death may play a part, though  
52  
53 similarly very low mortality after the study period ended does not support this. The role that  
54  
55  
56  
57  
58  
59  
60



1  
2  
3 factors such as free access to high quality medical care for everybody in Qatar, availability of a  
4 high number of critical care beds, or differences in viral subtypes, played, needs further study.  
5  
6  
7

8  
9 In response to the spread of COVID-19, the country took a series of public health measures,  
10 including limiting incoming passenger flights into Doha through Hamad International Airport and  
11 providing free state quarantine facilities for returning travelers. A host of other measures were  
12 implemented gradually that promoted physical distancing including, closing retail stores in malls  
13 and shopping centers, closing entertainment and dining facilities, postponing or canceling large  
14 sports events and conferences, suspending classes in schools and universities, and mandating  
15 working from home for 80% of workers in the public and private sectors. The healthcare system  
16 was also reorganized to prioritize COVID-19 response over routine services. All positive cases  
17 including those without symptoms were admitted to isolation facilities by the public healthcare  
18 system. These public health measures were heavily promoted and widely communicated  
19 through social and traditional media outlets to all segments of society. Mobility data shows a  
20 significant reduction in visits to common retail, recreation, transit and workplace areas, which  
21 may have contributed to a reduction in spread of infection. There was a more pronounced  
22 reduction in mobility in the weeks following April 5th, which coincides with the significant rise in  
23 the reported number of positive cases.  
24  
25  
26  
27  
28  
29  
30  
31  
32  
33  
34  
35  
36  
37  
38  
39  
40  
41  
42

43 Strengths of our study include unified contact tracing and testing, with all testing done at a  
44 single lab. All tests performed in the State of Qatar were included, providing a robust national  
45 estimate of the number of infected persons among those tested. There are limitations to our  
46 study. Comorbidities were retrieved from the electronic medical records using ICD-10 AM  
47 codes. Exact geographic location and contact tracing data were not included in the current  
48 report. Our study end date was April 18, 2020, and all persons with confirmed infection till that  
49  
50  
51  
52  
53  
54  
55  
56  
57  
58  
59  
60

1  
2  
3 date were included. However, it is possible that some persons may have progressed to more  
4  
5 severe disease after this date.  
6  
7  
8

9  
10 In conclusion, we describe the evolution of COVID-19 epidemic in the State of Qatar. The  
11  
12 epidemic predominantly affected males and younger population and was associated with no or  
13  
14 minimal symptoms in a vast majority of the infected persons. Public health measures were  
15  
16 instituted early and may have led to the slower growth compared with other countries which  
17  
18 delayed such measures.  
19

### 20 **Funding**

21  
22 None  
23  
24  
25

### 26 **Competing interests:**

27  
28 None of the authors have any financial conflict of interest related to this article.  
29

30  
31 H.E. Dr. Hanan. M. Al Kuwari is the Minister of Public Health for the State of Qatar.  
32  
33  
34

### 35 **Ethical Approval**

36  
37 This study was approved by the Institutional Review Board at Hamad Medical Corporation.  
38  
39 (MRC-05-011)  
40  
41  
42

### 43 **Patient Consent**

44  
45 A waiver of informed consent was granted.  
46  
47  
48

### 49 **Data Sharing Statement**

50  
51 No additional data are available  
52  
53  
54

### 55 **Patient of Public Involvement**

1  
2  
3 There was not patient or public involvement in the design, conduct or reporting of this study.  
4  
5  
6

7 **Transparency declaration**  
8

9 The lead author (the manuscript's guarantor) affirms that the manuscript is an honest, accurate,  
10 and transparent account of the study being reported; that no important aspects of the study  
11 have been omitted; and that any discrepancies from the study as planned (and, if relevant,  
12 registered) have been explained.  
13  
14  
15  
16  
17  
18  
19

20 **Dissemination declaration**  
21

22 Dissemination to study participants or patient organizations is not possible/applicable.  
23  
24  
25  
26  
27  
28  
29  
30  
31  
32  
33  
34  
35  
36  
37  
38  
39  
40  
41  
42  
43  
44  
45  
46  
47  
48  
49  
50  
51  
52  
53  
54  
55  
56  
57  
58  
59  
60

Table 1. Characteristics of 5,685 patients with confirmed COVID-19 infection in Qatar between February 29 and April 18, 2020.

| Variable               | N (%)         |
|------------------------|---------------|
| <b>Demographics</b>    |               |
| Mean age, years (SD)   | 35.8 (12.0)   |
| 0-20 years             | 302 (5.3%)    |
| 21-40 years            | 3,666 (64.5%) |
| 41-60 years            | 1,537 (27.0%) |
| >60 years              | 180 (3.2%)    |
| Male sex               | 5,052 (88.9%) |
| <b>Nationality</b>     |               |
| Indian                 | 1,559 (27.4%) |
| Bangladeshi            | 1,077 (18.9%) |
| Nepalese               | 1,047 (18.4%) |
| Qatari                 | 497 (8.7%)    |
| Pakistani              | 353 (6.2%)    |
| Filipino               | 185 (3.3%)    |
| Egyptian               | 179 (3.1%)    |
| Sri Lankan             | 109 (1.9%)    |
| Sudanese               | 91 (1.6%)     |
| Others                 | 588 (10.3%)   |
| <b>Comorbidities</b>   |               |
| Hypertension           | 391 (6.9%)    |
| Diabetes mellitus      | 344 (6.0%)    |
| Cardiovascular disease | 250 (4.4%)    |

|                                       |               |
|---------------------------------------|---------------|
| Chronic lung disease                  | 169 (3.0%)    |
| Chronic kidney disease                | 35 (0.6%)     |
| Solid organ malignancy                | 30 (0.5%)     |
| Tuberculosis                          | 13 (0.2%)     |
| Chronic liver disease                 | 12 (0.2%)     |
| Autoimmune disease                    | 6 (0.1%)      |
| Missing                               | 235 (4.1%)    |
| Number of comorbidities (235 missing) |               |
| 0                                     | 4,753 (83.6%) |
| 1                                     | 384 (6.8%)    |
| 2                                     | 139 (2.5%)    |
| 3                                     | 121 (2.1%)    |
| ≥4                                    | 53 (0.9%)     |
| Missing                               | 235 (4.1%)    |
| Severity of illness                   |               |
| Asymptomatic or minimal symptoms      | 5,168 (90.9%) |
| Mild illness without pneumonia        | 44 (0.8%)     |
| Mild illness with pneumonia           | 133 (2.3%)    |
| Severe illness                        | 82 (1.4%)     |
| Critical illness                      | 35 (0.6%)     |
| Missing                               | 223 (3.9%)    |

Table 2. Prevalence of comorbidities by severity of illness.

|                        | <b>Asymptomatic or minimally symptomatic</b> | <b>Mild illness with or without pneumonia</b> | <b>Severe/critical illness</b> |
|------------------------|----------------------------------------------|-----------------------------------------------|--------------------------------|
|                        | <b>N (%)</b>                                 | <b>N (%)</b>                                  | <b>N (%)</b>                   |
| Hypertension           | 317 (6.1%)                                   | 41 (23.2%)                                    | 31 (26.5%)                     |
| Diabetes mellitus      | 281 (5.4%)                                   | 33 (18.6%)                                    | 30 (25.6%)                     |
| Cardiovascular disease | 199 (3.8%)                                   | 31 (17.5%)                                    | 19 (16.2%)                     |
| Chronic lung disease   | 145 (2.8%)                                   | 12 (6.8%)                                     | 10 (8.6%)                      |
| Chronic kidney disease | 25 (0.5%)                                    | 6 (3.4%)                                      | 4 (3.4%)                       |
| Solid organ malignancy | 26 (0.5%)                                    | 2 (1.1%)                                      | 2 (1.7%)                       |
| Tuberculosis           | 10 (0.2%)                                    | 2 (1.1%)                                      | 1 (0.8%)                       |
| Chronic liver disease  | 10 (0.2%)                                    | 2 (1.1%)                                      | 0 (0%)                         |
| Autoimmune disease     | 5 (0.1%)                                     | 1 (0.6%)                                      | 0 (0%)                         |

1  
2  
3  
4  
5  
6  
7  
8  
9  
10  
11  
12  
13  
14  
15  
16  
17  
18  
19  
20  
21  
22  
23  
24  
25  
26  
27  
28  
29  
30  
31  
32  
33  
34  
35  
36  
37  
38  
39  
40  
41  
42  
43  
44  
45  
46  
47

Table 3. Number of comorbidities by severity of illness.

| <b>Number of comorbidities</b> | <b>Asymptomatic or minimal symptoms, N (%)</b> | <b>Mild illness with or without pneumonia, N (%)</b> | <b>Severe/critical illness, N (%)</b> |
|--------------------------------|------------------------------------------------|------------------------------------------------------|---------------------------------------|
| No comorbidity                 | 4,582 (96.1%)                                  | 120 (2.5%)                                           | 67 (1.4%)                             |
| Only 1 comorbidity             | 330 (86.6%)                                    | 23 (6.0%)                                            | 28 (7.3%)                             |
| 2 or more comorbidities        | 256 (82.1%)                                    | 34 (10.9%)                                           | 22 (7.1%)                             |

Peer review only

Table 4. Factors associated with severe or critical illness (multivariable logistic regression model).

| Variables                           | Odds Ratio | [95% Conf. Interval] |      | P-value |
|-------------------------------------|------------|----------------------|------|---------|
| Age                                 |            |                      |      |         |
| 0-20 years (reference)              | reference  |                      |      |         |
| 21-40 years                         | 1.51       | 0.46                 | 4.93 | 0.62    |
| 41-60 years                         | 1.57       | 0.45                 | 5.46 | 0.55    |
| 60+ years                           | 1.39       | 0.3                  | 6.49 | 0.94    |
| Male gender                         | 0.98       | 0.53                 | 1.83 | 0.95    |
| Qatari nationality (vs. non-Qatari) | 0.83       | 0.43                 | 1.6  | 0.58    |
| Hypertension                        | 3.49       | 1.83                 | 6.68 | 0.0002  |
| Diabetes mellitus                   | 3.17       | 1.76                 | 5.71 | 0.0001  |
| Cardiovascular disease              | 0.54       | 0.24                 | 1.22 | 0.14    |
| Chronic lung disease                | 1.64       | 0.79                 | 3.42 | 0.19    |
| Chronic kidney disease              | 1.31       | 0.41                 | 4.21 | 0.65    |
| Cancer                              | 1.26       | 0.28                 | 5.66 | 0.77    |



Table 5. Relative change in people visiting areas of common interest in the State of Qatar.

(Comparison period January 3, 2020 – February 6, 2020)

|                     | Qatar March 29 | Qatar April 5 | Qatar April 11 | Qatar April 17 |
|---------------------|----------------|---------------|----------------|----------------|
| Retail & Recreation | -51%           | -50%          | -63%           | -69%           |
| Grocery & Pharmacy  | -25%           | -21%          | -35%           | -44%           |
| Parks               | -34%           | -35%          | -48%           | -64%           |
| Transit stations    | -52%           | -52%          | -60%           | -68%           |
| Workplaces          | -31%           | -36%          | -39%           | -38%           |
| Residential         | +22%           | +24%          | +23%           | +21%           |

1  
2  
3 Figure 1. Epidemiologic curve of patients with COVID-19 in Qatar.  
4  
5  
6  
7  
8  
9  
10  
11  
12  
13  
14  
15  
16  
17  
18  
19  
20  
21  
22  
23  
24  
25  
26  
27  
28  
29  
30  
31  
32  
33  
34  
35  
36  
37  
38  
39  
40  
41  
42  
43  
44  
45  
46  
47

For peer review only

Figure 2. Positivity rate among those tested for SARS-CoV-2 active infection by swab day.

For peer review only

## References

1. Zhu N, Zhang D, Wang W, et al. A Novel Coronavirus from Patients with Pneumonia in China, 2019. *N Engl J Med* 2020;382:727-33.
2. Chen N, Zhou M, Dong X, et al. Epidemiological and clinical characteristics of 99 cases of 2019 novel coronavirus pneumonia in Wuhan, China: a descriptive study. *Lancet* 2020;395:507-13.
3. Huang C, Wang Y, Li X, et al. Clinical features of patients infected with 2019 novel coronavirus in Wuhan, China. *Lancet* 2020;395:497-506.
4. Wang D, Hu B, Hu C, et al. Clinical Characteristics of 138 Hospitalized Patients With 2019 Novel Coronavirus-Infected Pneumonia in Wuhan, China. *JAMA* 2020. doi 10.1001/jama.2020.1585.
5. Lu R, Zhao X, Li J, et al. Genomic characterisation and epidemiology of 2019 novel coronavirus: implications for virus origins and receptor binding. *Lancet* 2020;395:565-74.
6. Phan LT, Nguyen TV, Luong QC, et al. Importation and Human-to-Human Transmission of a Novel Coronavirus in Vietnam. *N Engl J Med* 2020;382:872-4.
7. Young BE, Ong SWX, Kalimuddin S, et al. Epidemiologic Features and Clinical Course of Patients Infected With SARS-CoV-2 in Singapore. *JAMA* 2020. doi 10.1001/jama.2020.3204.
8. Holshue ML, DeBolt C, Lindquist S, et al. First Case of 2019 Novel Coronavirus in the United States. *N Engl J Med* 2020;382:929-36.
9. Lescure FX, Bouadma L, Nguyen D, et al. Clinical and virological data of the first cases of COVID-19 in Europe: a case series. *Lancet Infect Dis* doi 101016/S1473-3099(20)30200-0 2020.
10. Oksanen A, Kaakinen M, Latikka R, Savolainen I, Savela N, Koivula A. Regulation and trust: COVID-19 mortality in 25 European countries. *JMIR Public Health Surveill* 2020.
11. <https://worldpopulationreview.com/countries/qatar-population/> Accessed 21 April 2020. 2020.
12. Wu C, Chen X, Cai Y, et al. Risk Factors Associated With Acute Respiratory Distress Syndrome and Death in Patients With Coronavirus Disease 2019 Pneumonia in Wuhan, China. *JAMA internal medicine* 2020. doi 10.1001/jamainternmed.2020.0994.
13. Zhou F, Yu T, Du R, et al. Clinical course and risk factors for mortality of adult inpatients with COVID-19 in Wuhan, China: a retrospective cohort study. *Lancet* 2020;395:1054-62.
14. Nour M, Alhajri M, Farag E, et al. How Do the First Days Count? A Case Study of Qatar Experience in Emergency Risk Communication during the MERS-CoV Outbreak. *Int J Environ Res Public Health* doi 103390/ijerph14121597 2017;14.
15. Farag E, Nour M, Islam MM, et al. Qatar experience on One Health approach for middle-east respiratory syndrome coronavirus, 2012-2017: A viewpoint. *One Health* 2019;7:100090.
16. WHO. Clinical management of severe acute respiratory infection when COVID-19 disease is suspected. file:///C:/Users/aabutt/Downloads/WHO-2019-nCoV-clinical-20204-engpdf Accessed 24 April 2020 2020.
17. GOOGLE. <https://www.google.com/covid19/mobility/> Accessed 25 April 2020. 2020.
18. WHO. <https://www.who.int/news-room/detail/08-04-2020-who-timeline---covid-19> accessed 21 April 2020.

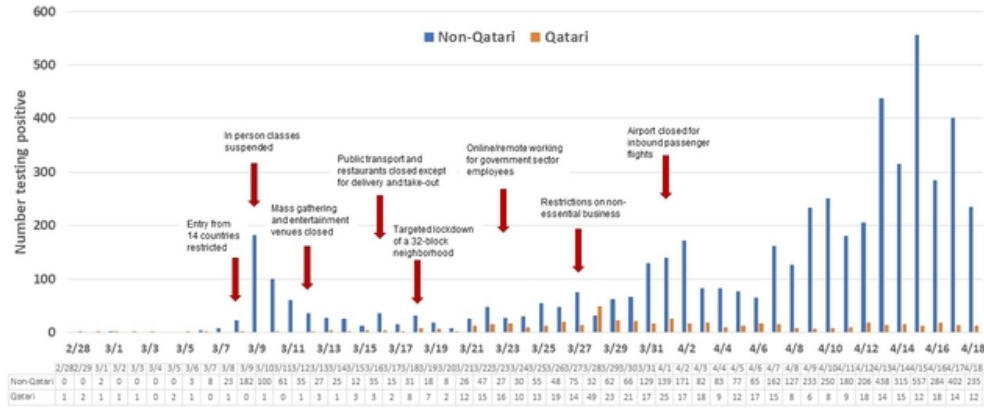

Figure 1

54x30mm (300 x 300 DPI)

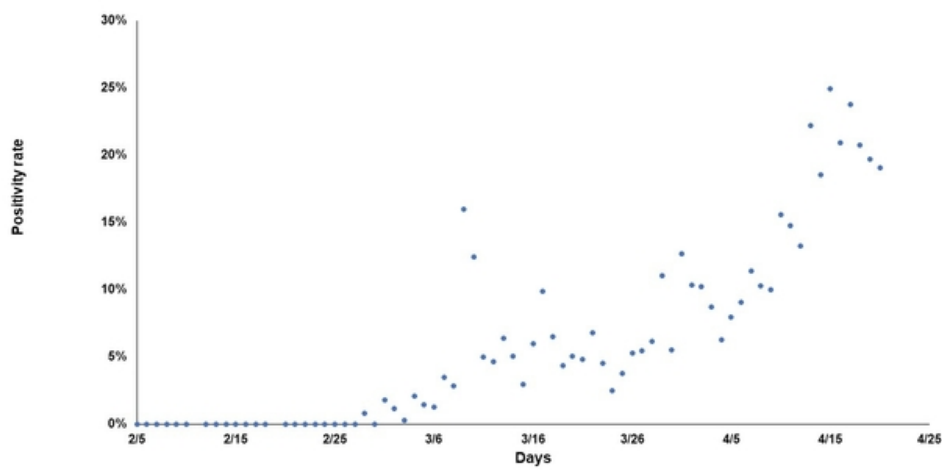

Figure 2

54x30mm (300 x 300 DPI)

1  
2  
3  
4  
5  
6  
7  
8  
9  
10  
11  
12  
13  
14  
15  
16  
17  
18  
19  
20  
21  
22  
23  
24  
25  
26  
27  
28  
29  
30  
31  
32  
33  
34  
35  
36  
37  
38  
39  
40  
41  
42  
43  
44  
45  
46  
47

Supplementary figure. Number of tests done and number of persons who tested positive per day.

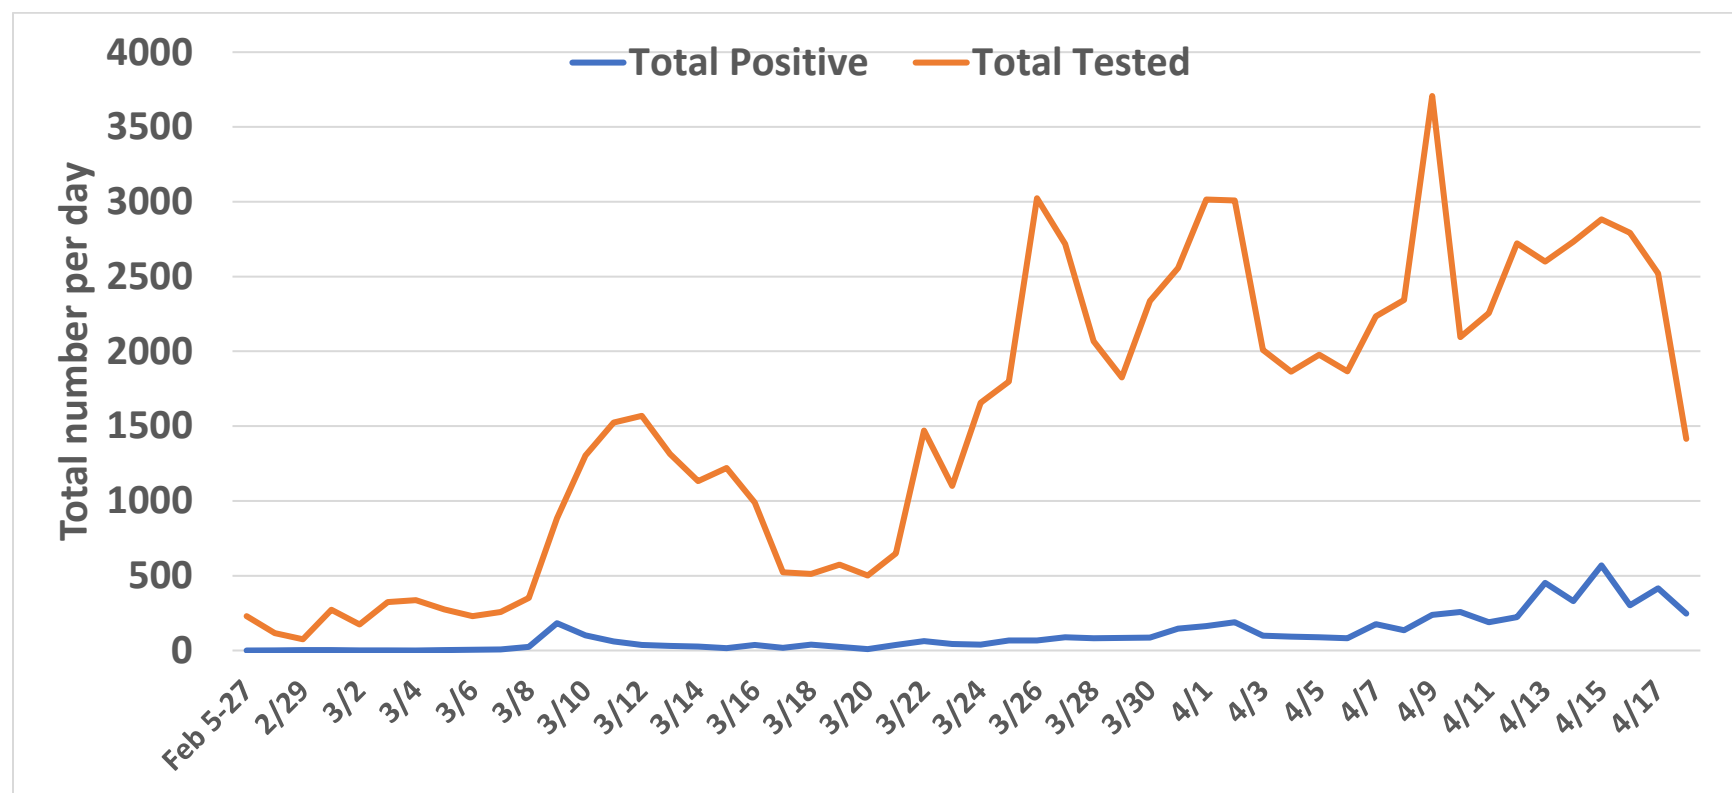

Supplementary table. World Health Organization definitions of severity of illness in persons with COVID-19 infection.

| Category |                                     | Definition                                                                                                                                                                                                                                                                                                                                                                                                                                                                                                                                                                                                                                                                                                                                                                                                                                                                                                                                                                                                                                                                                                                                                                                                                                                                                                                  |
|----------|-------------------------------------|-----------------------------------------------------------------------------------------------------------------------------------------------------------------------------------------------------------------------------------------------------------------------------------------------------------------------------------------------------------------------------------------------------------------------------------------------------------------------------------------------------------------------------------------------------------------------------------------------------------------------------------------------------------------------------------------------------------------------------------------------------------------------------------------------------------------------------------------------------------------------------------------------------------------------------------------------------------------------------------------------------------------------------------------------------------------------------------------------------------------------------------------------------------------------------------------------------------------------------------------------------------------------------------------------------------------------------|
| Mild     |                                     | <p>Patients with uncomplicated upper respiratory tract viral infection, may have non-specific symptoms such as fever, fatigue, cough (with or without sputum production), anorexia, malaise, muscle pain, sore throat, dyspnea, nasal congestion, or headache. Rarely, patients may also present with diarrhoea, nausea and vomiting.</p> <p>The elderly and immunosuppressed may present with atypical symptoms. Symptoms due to physiologic adaptations of pregnancy or adverse pregnancy events, such as e.g. dyspnea, fever, GI-symptoms or fatigue, may overlap with COVID-19 symptoms.</p>                                                                                                                                                                                                                                                                                                                                                                                                                                                                                                                                                                                                                                                                                                                            |
|          | Pneumonia                           | <p>Adult with pneumonia but no signs of severe pneumonia and no need for supplemental oxygen.<br/>           Child with non-severe pneumonia who has cough or difficulty breathing + fast breathing: fast breathing (in breaths/min): &lt; 2 months: <math>\geq 60</math>; 2–11 months: <math>\geq 50</math>; 1–5 years: <math>\geq 40</math>, and no signs of severe pneumonia.</p>                                                                                                                                                                                                                                                                                                                                                                                                                                                                                                                                                                                                                                                                                                                                                                                                                                                                                                                                        |
| Severe   | Severe pneumonia                    | <p>Adolescent or adult: fever or suspected respiratory infection, plus one of: respiratory rate &gt; 30 breaths/min; severe respiratory distress; or SpO<sub>2</sub> <math>\leq 93\%</math> on room air.<br/>           Child with cough or difficulty in breathing, plus at least one of the following: central cyanosis or SpO<sub>2</sub> &lt; 90%; severe respiratory distress (e.g. grunting, very severe chest indrawing); signs of pneumonia with a general danger sign: inability to breastfeed or drink, lethargy or unconsciousness, or convulsions. Other signs of pneumonia may be present: chest indrawing, fast breathing (in breaths/min): &lt; 2 months: <math>\geq 60</math>; 2–11 months: <math>\geq 50</math>; 1–5 years: <math>\geq 40</math>. While the diagnosis is made on clinical grounds; chest imaging may identify or exclude some pulmonary complications.</p>                                                                                                                                                                                                                                                                                                                                                                                                                                 |
| Critical | Acute respiratory distress syndrome | <p>Onset: within 1 week of a known clinical insult or new or worsening respiratory symptoms.<br/>           Chest imaging (radiograph, CT scan, or lung ultrasound): bilateral opacities, not fully explained by volume overload, lobar or lung collapse, or nodules.<br/>           Origin of pulmonary infiltrates: respiratory failure not fully explained by cardiac failure or fluid overload.<br/>           Need objective assessment (e.g. echocardiography) to exclude hydrostatic cause of infiltrates/oedema if no risk factor present.</p> <p>Oxygenation impairment in adults:<br/>           Mild ARDS: <math>200 \text{ mmHg} &lt; \text{PaO}_2/\text{FiO}_2 \leq 300 \text{ mmHg}</math> (with PEEP or CPAP <math>\geq 5 \text{ cmH}_2\text{O}</math>, or non-ventilated)<br/>           Moderate ARDS: <math>100 \text{ mmHg} &lt; \text{PaO}_2/\text{FiO}_2 \leq 200 \text{ mmHg}</math> (with PEEP <math>\geq 5 \text{ cmH}_2\text{O}</math>, or non-ventilated)<br/>           Severe ARDS: <math>\text{PaO}_2/\text{FiO}_2 \leq 100 \text{ mmHg}</math> (with PEEP <math>\geq 5 \text{ cmH}_2\text{O}</math>, or non-ventilated)<br/>           When PaO<sub>2</sub> is not available, SpO<sub>2</sub>/FiO<sub>2</sub> <math>\leq 315</math> suggests ARDS (including in non-ventilated patients).</p> |



1  
2  
3  
4  
5  
6  
7  
8  
9  
10  
11  
12  
13  
14  
15  
16  
17  
18  
19  
20  
21  
22  
23  
24  
25  
26  
27  
28  
29  
30  
31  
32  
33  
34  
35  
36  
37  
38  
39  
40  
41  
42  
43  
44  
45  
46  
47

|  |              |                                                                                                                                                                                                                                                                                                                                                                                                                                                                                                                                                                                                                                                                  |
|--|--------------|------------------------------------------------------------------------------------------------------------------------------------------------------------------------------------------------------------------------------------------------------------------------------------------------------------------------------------------------------------------------------------------------------------------------------------------------------------------------------------------------------------------------------------------------------------------------------------------------------------------------------------------------------------------|
|  |              | <p>Oxygenation impairment in children: note OI = Oxygenation Index and OSI = Oxygenation Index using SpO2. Use PaO2-based metric when available. If PaO2 not available, wean FiO2 to maintain SpO2 ≤ 97% to calculate OSI or SpO2/FiO2 ratio:<br/>       Bilevel (NIV or CPAP) ≥ 5 cmH2O via full face mask: PaO2/FiO2 ≤ 300 mmHg or SpO2/FiO2 ≤ 264<br/>       Mild ARDS (invasively ventilated): 4 ≤ OI &lt; 8 or 5 ≤ OSI &lt; 7.5<br/>       Moderate ARDS (invasively ventilated): 8 ≤ OI &lt; 16 or 7.5 ≤ OSI &lt; 12.3<br/>       Severe ARDS (invasively ventilated): OI ≥ 16 or OSI ≥ 12.3.</p>                                                          |
|  | Sepsis       | <p>Adults: life-threatening organ dysfunction caused by a dysregulated host response to suspected or proven infection.<sup>1</sup> Signs of organ dysfunction include: altered mental status, difficult or fast breathing, low oxygen saturation, reduced urine output, fast heart rate, weak pulse, cold extremities or low blood pressure, skin mottling, or laboratory evidence of coagulopathy, thrombocytopenia, acidosis, high lactate or hyperbilirubinemia.</p> <p>Children: suspected or proven infection and ≥ 2 aged based systemic inflammatory response syndrome criteria, of which one must be abnormal temperature or white blood cell count.</p> |
|  | Septic shock | <p>Adults: persisting hypotension despite volume resuscitation, requiring vasopressors to maintain MAP ≥ 65 mmHg and serum lactate level &gt; 2 mmol/L.</p> <p>Children: any hypotension (SBP &lt; 5th centile or &gt; 2 SD below normal for age) or two or three of the following: altered mental state; tachycardia or bradycardia (HR &lt; 90 bpm or &gt; 160 bpm in infants and HR &lt; 70 bpm or &gt; 150 bpm in children); prolonged capillary refill (&gt; 2 sec) or feeble pulse; tachypnea; mottled or cool skin or petechial or purpuric rash; increased lactate; oliguria; hyperthermia or hypothermia.</p>                                           |

For peer review only

Supplementary table 2. Factors associated with severe or critical illness after excluding those with missing severity of illness data (multivariable logistic regression model).

| Variables                           | Odds Ratio | [95% Conf. Interval] |      | P-value |
|-------------------------------------|------------|----------------------|------|---------|
| Age                                 |            |                      |      |         |
| 0-20 years (reference)              | reference  |                      |      |         |
| 21-40 years                         | 1.51       | 0.46                 | 4.93 | 0.62    |
| 41-60 years                         | 1.57       | 0.45                 | 5.43 | 0.55    |
| 60+ years                           | 1.40       | 0.30                 | 6.55 | 0.94    |
| Male gender                         | 0.98       | 0.53                 | 1.83 | 0.95    |
| Qatari nationality (vs. non-Qatari) | 0.83       | 0.43                 | 1.60 | 0.58    |
| Hypertension                        | 3.48       | 1.82                 | 6.66 | 0.0002  |
| Diabetes mellitus                   | 3.14       | 1.74                 | 5.65 | 0.0001  |
| Cardiovascular disease              | 0.55       | 0.24                 | 1.22 | 0.14    |
| Chronic lung disease                | 1.65       | 0.79                 | 3.43 | 0.19    |
| Chronic kidney disease              | 1.31       | 0.41                 | 4.21 | 0.65    |
| Cancer                              | 1.25       | 0.28                 | 5.65 | 0.77    |

Supplementary table 3. Factors associated with severe or critical illness by number of comorbidities (multivariable logistic regression model).

| Variables                           | Odds Ratio | [95% Conf. Interval] |       | P-value |
|-------------------------------------|------------|----------------------|-------|---------|
| Age                                 |            |                      |       |         |
| 0-20 years (reference)              |            |                      |       |         |
| 21-40 years                         | 1.42       | 0.43                 | 4.67  | 0.75    |
| 41-60 years                         | 1.49       | 0.43                 | 5.19  | 0.65    |
| 60+ years                           | 1.44       | 0.31                 | 6.66  | 0.84    |
| Male gender                         | 0.96       | 0.51                 | 1.78  | 0.89    |
| Qatari nationality (vs. non-Qatari) | 0.83       | 0.43                 | 1.58  | 0.57    |
| Number of comorbidities             |            |                      |       |         |
| 0 (reference)                       |            |                      |       |         |
| Any 1                               | 5.43       | 3.41                 | 8.63  | 0.01    |
| 3 or more                           | 6.16       | 3.35                 | 11.32 | 0.01    |

## STROBE Statement—checklist of items that should be included in reports of observational studies

|                           | Item No | Recommendation                                                                                                                                                                                                                                                                                                                                                                                                                                                         |                       |
|---------------------------|---------|------------------------------------------------------------------------------------------------------------------------------------------------------------------------------------------------------------------------------------------------------------------------------------------------------------------------------------------------------------------------------------------------------------------------------------------------------------------------|-----------------------|
| <b>Title and abstract</b> | 1       | (a) Indicate the study's design with a commonly used term in the title or the abstract                                                                                                                                                                                                                                                                                                                                                                                 |                       |
|                           |         | (b) Provide in the abstract an informative and balanced summary of what was done and what was found                                                                                                                                                                                                                                                                                                                                                                    | Included              |
| <b>Introduction</b>       |         |                                                                                                                                                                                                                                                                                                                                                                                                                                                                        |                       |
| Background/rationale      | 2       | Explain the scientific background and rationale for the investigation being reported                                                                                                                                                                                                                                                                                                                                                                                   | Included              |
| Objectives                | 3       | State specific objectives, including any prespecified hypotheses                                                                                                                                                                                                                                                                                                                                                                                                       | Included              |
| <b>Methods</b>            |         |                                                                                                                                                                                                                                                                                                                                                                                                                                                                        |                       |
| Study design              | 4       | Present key elements of study design early in the paper                                                                                                                                                                                                                                                                                                                                                                                                                | Included              |
| Setting                   | 5       | Describe the setting, locations, and relevant dates, including periods of recruitment, exposure, follow-up, and data collection                                                                                                                                                                                                                                                                                                                                        | Included              |
| Participants              | 6       | (a) <i>Cohort study</i> —Give the eligibility criteria, and the sources and methods of selection of participants. Describe methods of follow-up<br><i>Case-control study</i> —Give the eligibility criteria, and the sources and methods of case ascertainment and control selection. Give the rationale for the choice of cases and controls<br><i>Cross-sectional study</i> —Give the eligibility criteria, and the sources and methods of selection of participants | Included              |
|                           |         | (b) <i>Cohort study</i> —For matched studies, give matching criteria and number of exposed and unexposed<br><i>Case-control study</i> —For matched studies, give matching criteria and the number of controls per case                                                                                                                                                                                                                                                 |                       |
| Variables                 | 7       | Clearly define all outcomes, exposures, predictors, potential confounders, and effect modifiers. Give diagnostic criteria, if applicable                                                                                                                                                                                                                                                                                                                               | Included              |
| Data sources/measurement  | 8*      | For each variable of interest, give sources of data and details of methods of assessment (measurement). Describe comparability of assessment methods if there is more than one group                                                                                                                                                                                                                                                                                   | Included              |
| Bias                      | 9       | Describe any efforts to address potential sources of bias                                                                                                                                                                                                                                                                                                                                                                                                              | Limitations described |
| Study size                | 10      | Explain how the study size was arrived at                                                                                                                                                                                                                                                                                                                                                                                                                              | Included              |
| Quantitative variables    | 11      | Explain how quantitative variables were handled in the analyses. If applicable, describe which groupings were chosen and why                                                                                                                                                                                                                                                                                                                                           | N/A                   |
| Statistical methods       | 12      | (a) Describe all statistical methods, including those used to control for confounding                                                                                                                                                                                                                                                                                                                                                                                  | Included              |
|                           |         | (b) Describe any methods used to examine subgroups                                                                                                                                                                                                                                                                                                                                                                                                                     | N/A                   |

|                   |     |                                                                                                                                                                                                                                                                                                           |          |
|-------------------|-----|-----------------------------------------------------------------------------------------------------------------------------------------------------------------------------------------------------------------------------------------------------------------------------------------------------------|----------|
|                   |     | and interactions                                                                                                                                                                                                                                                                                          |          |
|                   |     | (c) Explain how missing data were addressed                                                                                                                                                                                                                                                               | N/A      |
|                   |     | (d) <i>Cohort study</i> —If applicable, explain how loss to follow-up was addressed<br><i>Case-control study</i> —If applicable, explain how matching of cases and controls was addressed<br><i>Cross-sectional study</i> —If applicable, describe analytical methods taking account of sampling strategy | N/A      |
|                   |     | (e) Describe any sensitivity analyses                                                                                                                                                                                                                                                                     | N/A      |
| <b>Results</b>    |     |                                                                                                                                                                                                                                                                                                           |          |
| Participants      | 13* | (a) Report numbers of individuals at each stage of study—eg numbers potentially eligible, examined for eligibility, confirmed eligible, included in the study, completing follow-up, and analysed<br>(b) Give reasons for non-participation at each stage<br>(c) Consider use of a flow diagram           | Included |
| Descriptive data  | 14* | (a) Give characteristics of study participants (eg demographic, clinical, social) and information on exposures and potential confounders                                                                                                                                                                  | Included |
|                   |     | (b) Indicate number of participants with missing data for each variable of interest                                                                                                                                                                                                                       |          |
|                   |     | (c) <i>Cohort study</i> —Summarise follow-up time (eg, average and total amount)                                                                                                                                                                                                                          |          |
| Outcome data      | 15* | <i>Cohort study</i> —Report numbers of outcome events or summary measures over time                                                                                                                                                                                                                       | Included |
|                   |     | <i>Case-control study</i> —Report numbers in each exposure category, or summary measures of exposure                                                                                                                                                                                                      |          |
|                   |     | <i>Cross-sectional study</i> —Report numbers of outcome events or summary measures                                                                                                                                                                                                                        |          |
| Main results      | 16  | (a) Give unadjusted estimates and, if applicable, confounder-adjusted estimates and their precision (eg, 95% confidence interval). Make clear which confounders were adjusted for and why they were included                                                                                              | N/A      |
|                   |     | (b) Report category boundaries when continuous variables were categorized                                                                                                                                                                                                                                 |          |
|                   |     | (c) If relevant, consider translating estimates of relative risk into absolute risk for a meaningful time period                                                                                                                                                                                          |          |
| Other analyses    | 17  | Report other analyses done—eg analyses of subgroups and interactions, and sensitivity analyses                                                                                                                                                                                                            | Included |
| <b>Discussion</b> |     |                                                                                                                                                                                                                                                                                                           |          |
| Key results       | 18  | Summarise key results with reference to study objectives                                                                                                                                                                                                                                                  | Included |
| Limitations       | 19  | Discuss limitations of the study, taking into account sources of potential bias or imprecision. Discuss both direction and magnitude of any potential bias                                                                                                                                                | Included |
| Interpretation    | 20  | Give a cautious overall interpretation of results considering objectives, limitations, multiplicity of analyses, results from similar studies, and other relevant evidence                                                                                                                                | Included |
| Generalisability  | 21  | Discuss the generalisability (external validity) of the study results                                                                                                                                                                                                                                     | Included |

| Other information |    |                                                                                                                                                               |          |
|-------------------|----|---------------------------------------------------------------------------------------------------------------------------------------------------------------|----------|
| Funding           | 22 | Give the source of funding and the role of the funders for the present study and, if applicable, for the original study on which the present article is based | Included |

\*Give information separately for cases and controls in case-control studies and, if applicable, for exposed and unexposed groups in cohort and cross-sectional studies.

**Note:** An Explanation and Elaboration article discusses each checklist item and gives methodological background and published examples of transparent reporting. The STROBE checklist is best used in conjunction with this article (freely available on the Web sites of PLoS Medicine at <http://www.plosmedicine.org/>, Annals of Internal Medicine at <http://www.annals.org/>, and Epidemiology at <http://www.epidem.com/>). Information on the STROBE Initiative is available at [www.strobe-statement.org](http://www.strobe-statement.org).

# BMJ Open

## Epidemiologic Investigation of the First 5,685 Cases of SARS-CoV-2 Infection in Qatar, February 28-April 18, 2020

|                                 |                                                                                                                                                                                                                                                                                                                                                                                                                                                                                                                                                                                                                                                                                                                                                                                                                                                                                                                                                                                                                                                                                                                                                                                                                                                                                                             |
|---------------------------------|-------------------------------------------------------------------------------------------------------------------------------------------------------------------------------------------------------------------------------------------------------------------------------------------------------------------------------------------------------------------------------------------------------------------------------------------------------------------------------------------------------------------------------------------------------------------------------------------------------------------------------------------------------------------------------------------------------------------------------------------------------------------------------------------------------------------------------------------------------------------------------------------------------------------------------------------------------------------------------------------------------------------------------------------------------------------------------------------------------------------------------------------------------------------------------------------------------------------------------------------------------------------------------------------------------------|
| Journal:                        | <i>BMJ Open</i>                                                                                                                                                                                                                                                                                                                                                                                                                                                                                                                                                                                                                                                                                                                                                                                                                                                                                                                                                                                                                                                                                                                                                                                                                                                                                             |
| Manuscript ID                   | bmjopen-2020-040428.R1                                                                                                                                                                                                                                                                                                                                                                                                                                                                                                                                                                                                                                                                                                                                                                                                                                                                                                                                                                                                                                                                                                                                                                                                                                                                                      |
| Article Type:                   | Original research                                                                                                                                                                                                                                                                                                                                                                                                                                                                                                                                                                                                                                                                                                                                                                                                                                                                                                                                                                                                                                                                                                                                                                                                                                                                                           |
| Date Submitted by the Author:   | 20-Aug-2020                                                                                                                                                                                                                                                                                                                                                                                                                                                                                                                                                                                                                                                                                                                                                                                                                                                                                                                                                                                                                                                                                                                                                                                                                                                                                                 |
| Complete List of Authors:       | Al Kuwari, Hanan; Ministry of Public Health Qatar, Office of the Minister of Public Health<br>Abdul Rahim, Hanan; Qatar University, College of Health Sciences<br>Abu-Raddad, Laith; Healthcare policy and research<br>Abou-Samra, Abdul-Badi ; Hamad Medical Corporation, Department of Medicine<br>Al Kanaani, Zaina; Hamad Medical Corporation, Business Intelligence Unit<br>Al Khal, Abdullatif; Hamad Medical Corporation, Department of Medicine<br>Al Kuwari, Einas; Hamad Medical Corporation, Department of Laboratory Medicine<br>Al Marri, salih; Ministry of Public Health Qatar, Office of the Minister of Public Health<br>Al Masalmani, Muna; Hamad Medical Corporation, Department of Medicine<br>Al Romaihi, Hamad; Ministry of Public Health Qatar, Office of the Minister of Public Health<br>Al Thani, Mohammed; Ministry of Public Health Qatar, Office of the Minister of Public Health<br>Coyle, Peter; Hamad Medical Corporation, Department of Laboratory Medicine<br>Latif, Ali; Hamad Medical Corporation, Business Intelligence Unit<br>Owen, Robert; Hamad Medical Corporation, National Ambulance Service<br>Bertollini, Roberto; Ministry of Public Health Qatar, Office of the Minister of Public Health<br>Butt, Adeel; Hamad Medical Corporation, Department of Medicine |
| <b>Primary Subject Heading</b>: | Public health                                                                                                                                                                                                                                                                                                                                                                                                                                                                                                                                                                                                                                                                                                                                                                                                                                                                                                                                                                                                                                                                                                                                                                                                                                                                                               |
| Secondary Subject Heading:      | Epidemiology, Global health, Infectious diseases                                                                                                                                                                                                                                                                                                                                                                                                                                                                                                                                                                                                                                                                                                                                                                                                                                                                                                                                                                                                                                                                                                                                                                                                                                                            |
| Keywords:                       | Public health < INFECTIOUS DISEASES, Epidemiology < INFECTIOUS DISEASES, PUBLIC HEALTH                                                                                                                                                                                                                                                                                                                                                                                                                                                                                                                                                                                                                                                                                                                                                                                                                                                                                                                                                                                                                                                                                                                                                                                                                      |
|                                 |                                                                                                                                                                                                                                                                                                                                                                                                                                                                                                                                                                                                                                                                                                                                                                                                                                                                                                                                                                                                                                                                                                                                                                                                                                                                                                             |

1  
2  
3  
4  
5  
6  
7  
8  
9  
10  
11  
12  
13  
14  
15  
16  
17  
18  
19  
20  
21  
22  
23  
24  
25  
26  
27  
28  
29  
30  
31  
32  
33  
34  
35  
36  
37  
38  
39  
40  
41  
42  
43  
44  
45  
46  
47  
48  
49  
50  
51  
52  
53  
54  
55  
56  
57  
58  
59  
60

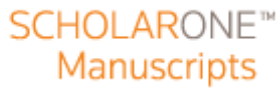



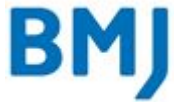

I, the Submitting Author has the right to grant and does grant on behalf of all authors of the Work (as defined in the below author licence), an exclusive licence and/or a non-exclusive licence for contributions from authors who are: i) UK Crown employees; ii) where BMJ has agreed a CC-BY licence shall apply, and/or iii) in accordance with the terms applicable for US Federal Government officers or employees acting as part of their official duties; on a worldwide, perpetual, irrevocable, royalty-free basis to BMJ Publishing Group Ltd ("BMJ") its licensees and where the relevant Journal is co-owned by BMJ to the co-owners of the Journal, to publish the Work in this journal and any other BMJ products and to exploit all rights, as set out in our [licence](#).

The Submitting Author accepts and understands that any supply made under these terms is made by BMJ to the Submitting Author unless you are acting as an employee on behalf of your employer or a postgraduate student of an affiliated institution which is paying any applicable article publishing charge ("APC") for Open Access articles. Where the Submitting Author wishes to make the Work available on an Open Access basis (and intends to pay the relevant APC), the terms of reuse of such Open Access shall be governed by a Creative Commons licence – details of these licences and which [Creative Commons](#) licence will apply to this Work are set out in our licence referred to above.

Other than as permitted in any relevant BMJ Author's Self Archiving Policies, I confirm this Work has not been accepted for publication elsewhere, is not being considered for publication elsewhere and does not duplicate material already published. I confirm all authors consent to publication of this Work and authorise the granting of this licence.

1  
2  
3 **Epidemiologic Investigation of the First 5,685 Cases of SARS-CoV-2**  
4  
5  
6 **Infection in Qatar, February 28-April 18, 2020**  
7  
8  
9

10 Hanan M. Al Kuwari, PhD<sup>1</sup>

11 Hanan F. Abdul Rahim, PhD<sup>2</sup>

12 Laith J. Abu Raddad, PhD<sup>3</sup>

13 Abdul-Badi Abou-Samra, MD, PhD<sup>4</sup>

14 Zaina Al Kanaani, MPH, PhD<sup>5</sup>

15 Abdullatif Al Khal, MD<sup>4</sup>

16 Einas Al Kuwari, MD<sup>6</sup>

17 Salih Al Marri, MD<sup>1</sup>

18 Muna Al Masalmani, MD<sup>4</sup>

19 Hamad Eid Al Romaihi, MD<sup>1</sup>

20 Mohamed H. Al Thani, MD, MPH<sup>1</sup>

21 Peter Coyle, MD<sup>6</sup>

22 Ali Nizar Latif, MBBS, MPH<sup>5</sup>

23 Robert Owen, MD<sup>7</sup>

24 **Roberto Bertollini, MD, MPH<sup>1</sup>**

25 **Adeel A. Butt, MBBS, MS<sup>4,8</sup>**

26  
27  
28 Author affiliations:

29 1 Office of the Minister of Public Health, Ministry of Public Health, Doha, Qatar

30 2 College of Health Sciences, QU Health, Qatar University, Doha, Qatar

31 3 Infectious Disease Epidemiology Group, Weill Cornell Medicine-Qatar, Cornell University,  
32 Doha, Qatar

1  
2  
3 4 Department of Medicine, Hamad Medical Corporation, Doha, Qatar

4 5 Business Intelligence Unit, Hamad Medical Corporation, Doha, Qatar

5 6 Department of Laboratory Medicine, Hamad Medical Corporation, Doha

6 7 National Ambulance Service, Hamad Medical Corporation, Doha, Qatar

7 8 Department of Medicine, Weill Cornell Medical College, New York, USA and Doha, Qatar

8 9  
9 10  
10 11  
11 12  
12 13  
13 14  
14 15  
15 16 Address all correspondence to:

16 17 Professor Adeel A. Butt

17 18 Department of Medicine

18 19 Hamad Medical Corporation

19 20 PO Box 3050, Doha, Qatar

20 21 E-mail: aabutt@hamad.qa

15 16 Alternate corresponding author:

16 17 Professor Roberto Bertollini

17 18 Ministry of Public Health

18 19 PO Box 42

19 20 Doha, Qatar

21 22 **Word count: 2,497;** **Abstract word count: 244**

22 23 **Tables: 5;** **Figures: 2**

23 24  
24 25  
25 26  
26 27  
27 28  
28 29  
29 30  
30 31  
31 32 Contributorship Statement:

32 33 Drafting of the manuscript: HMAK; HFAR; LJAR; RB; AAB;

33 34 Data acquisition: AAB; AAK; SMAT; ANL; ZAK; SAM; HEA; RO; MAM; SAK;

34 35 Laboratory testing and reporting: EAK; PC;

35 36 Study design: HMAK; HFAR; LJAR; RB; AAB;

36 37 Data analysis: AAB;

37 38 Data interpretation: HMAK; AAB; HFAR; LJAR; RB;

38 39 Critical appraisal and review: All authors

39 40  
40 41  
41 42  
42 43  
43 44  
44 45  
45 46  
46 47  
47 48  
48 49  
49 50  
50 51  
51 52  
52 53  
53 54  
54 55  
55 56  
56 57  
57 58  
58 59  
59 60  
60

56 57 Key words: SARS-CoV-2; COVID-19; Qatar; epidemiology;

1  
2  
3  
4  
5  
6  
7  
8  
9  
10  
11  
12  
13  
14  
15  
16  
17  
18  
19  
20  
21  
22  
23  
24  
25  
26  
27  
28  
29  
30  
31  
32  
33  
34  
35  
36  
37  
38  
39  
40  
41  
42  
43  
44  
45  
46  
47  
48  
49  
50  
51  
52  
53  
54  
55  
56  
57  
58  
59  
60

**Funding**

None

For peer review only

## Abstract

### Objective

To define the epidemiologic curve of COVID-19 in Qatar and determine factors associated with severe or critical illness

### Design

Case series of first 5,685 COVID-19 cases in Qatar

### Setting and Participants

All confirmed COVID-19 cases in the State of Qatar between February 28 and April 18, 2020

### Main Outcome Measures

Number of total and daily new COVID-19 infections; demographic characteristics and comorbidity burden and severity of infection; factors associated with severe or critical illness

### Results

Between February 28 and April 18, 2020, 5,685 cases of COVID-19 were identified. Median age was 34 (IQR 28,43) years, 88.9% were male and 8.7% were Qatari nationals. Overall, 83.6% had no concomitant comorbidity, and 3.0% had 3 or more comorbidities. The overwhelming majority (90.9%) were asymptomatic or with minimal symptoms, with 2.0% having severe or critical illness. Seven deaths were observed during the time interval studied. Presence of hypertension or diabetes was associated with a higher risk of severe or critical illness, but age was not. The epidemiologic curve indicated two distinct patterns of infection, a larger cluster among expatriate craft and manual workers, and a smaller one among Qatari nationals returning from abroad during the epidemic.

## Conclusion

COVID-19 infections in Qatar started in two distinct clusters, but then became more widespread in the population through community transmission. Infections were mostly asymptomatic or with minimal symptoms and associated with very low mortality. Severe/critical illness was associated with presence of hypertension or diabetes, but not with increasing age.

### Article Summary

Strengths and limitations of this study:

- National study with unified contact tracing and testing
- All testing done at a single lab, and all tests performed in the State of Qatar during the study period were included, providing a robust national estimate of the number of infected persons among those tested
- Comorbidities were retrieved from the electronic medical records using ICD-10 AM codes
- Exact geographic location and contact tracing data were not included in the current report
- It is possible that some persons still under care on the study end date may have progressed to more severe disease after that date

## Introduction

A cluster of patients with pneumonia of unknown etiology linked to a seafood wholesale market was first reported from Wuhan, China in December 2019.<sup>1-4</sup> A novel coronavirus, SARS-CoV-2 was isolated as the causative organism and the resultant disease was named COVID-19.<sup>1,5</sup> Initially presumed to be transmitted from animals to humans, the virus has since spread quickly across the globe through human-to-human transmission.<sup>6-9</sup> As of August 20, 2020, more than 22 million cases and over 791,000 deaths have been reported globally. Published epidemiologic studies across a number of populations show significant differences in rates and severity of infection and in case fatality rates.<sup>10</sup> At this stage of a novel virus pandemic, analyzing transmission patterns in populations with unique demographic characteristics can add to our understanding of the disease dynamics. While it is difficult to isolate the effects of public health measures, such as quarantine, lockdown, and physical distancing, it is nevertheless useful to track the course of the epidemic in relation to the timeline of their implementation for an understanding of the context in which the epidemic unfolded.

Qatar is a part of the six-country Gulf Cooperation Council (GCC), which also includes Saudi Arabia, Kuwait, Oman, Bahrain and the United Arab Emirates. Qatar has a unique population demographic profile. Among the 2.8 million residents of Qatar, expatriate workforce constitutes about 88% of the population.<sup>11</sup> Due to the nature of the expatriate workforce, the majority of the population in Qatar (~75%) are male, and the population pyramid is heavily concentrated in the 20-50 year age groups, particularly among males.<sup>11</sup> There is evidence that COVID-19 disproportionately affects males and outcomes are poorer in the older age group.<sup>3,12,13</sup> Influx or efflux of the population can also affect epidemic dynamics. Such changes in population can be expected in populations with a high proportion of non-national or non-native groups such as GCC countries. There were no travel restrictions in the early part of the study, i.e. from February 28 to March 30, 2020. A general restriction on all incoming flights into Qatar was implemented

1  
2  
3 on March 31, which halted almost all influx of visitors or residents into the country. Exit travel  
4 was not generally restricted. However, two factors diminished outbound travel sharply: 1) global  
5 restrictions on travel leading to a sharp reduction in all flights; 2) restriction of essential workers,  
6 e.g. healthcare workers, from taking leave and travelling except in urgent or emergency  
7 situations. Our main objective was to define the epidemiologic features of COVID-19 in Qatar,  
8 and to determine factors associated with severe or critical illness. Understanding the  
9 epidemiology and risk factors for serious infection in Qatar will be important in understanding  
10 the epidemiology in countries with unique demographic characteristics.  
11  
12  
13  
14  
15  
16  
17  
18  
19  
20  
21

## 22 **Methods**

23  
24 Even before the first case of COVID-19 was identified in the country, Qatar had instituted  
25 extensive plans to identify and manage persons with COVID-19 infection. The existing tracking,  
26 tracing and identification mechanism within the Ministry of Public Health, with proven  
27 effectiveness during the MERS-CoV outbreak, was expanded and put on alert.<sup>14,15</sup> Testing for  
28 suspected cases started on February 5, 2020, and the first case was recorded on February 28,  
29 2020. Using the Ministry of Public Health national database of COVID-19 patients, we  
30 retrospectively identified all confirmed cases of COVID-19 infection between February 28, 2020  
31 and April 18, 2020. All COVID-19 testing in Qatar was performed at the central laboratory of  
32 Hamad Medical Corporation, which is the public healthcare delivery arm for the State of Qatar  
33 and provides over 85% of the inpatient bed capacity in the State. During the study period, there  
34 was targeted, purposeful testing of persons presenting with symptoms of influenza-like illness  
35 suggesting COVID-19. For every person who tested positive, active and aggressive contact  
36 tracing was carried out by trained staff at the Ministry of Public Health. Nasopharyngeal and  
37 throat swabs were collected from suspected cases with symptoms of influenza-like illness  
38 suggesting COVID-19 and, if confirmed, from close contacts. Close contacts were identified  
39 based on the criteria published by the United States Centers for Disease Control and  
40  
41  
42  
43  
44  
45  
46  
47  
48  
49  
50  
51  
52  
53  
54  
55  
56  
57  
58  
59  
60



1  
2  
3 Prevention, which define a close contact as “any individual who was within 6 feet of an infected  
4 person for at least 15 minutes starting from 2 days before illness onset (or, for asymptomatic  
5 patients, 2 days prior to positive specimen collection) until the time the patient is isolated”.<sup>16</sup>  
6  
7

8  
9 Real time RT-PCR was used to detect SARS-CoV-2 infection using TaqPath COVID-19 Combo  
10 Kit (Thermo Fisher Scientific, Waltham, Massachusetts) or Cobas SARS-CoV-2 Test (Roche  
11 Diagnostics, Rotkreuz, Switzerland). These tests are highly sensitive and specific with no cross-  
12 reactivity against multiple other respiratory viruses.<sup>17,18</sup> Nationality of each tested person was  
13 ascertained from the official State Identification Card, which is issued to each national and  
14 expatriate worker and their dependents residing in Qatar. Demographic characteristics and  
15 comorbidities were retrieved from the electronic medical records where they are coded using  
16 the International Classification of Diseases 10<sup>th</sup> edition, Australian Modification. Severity of  
17 illness at the time of presentation was determined by expert coders using criteria suggested by  
18 the World Health Organization, including admission to an acute care or an intensive care bed,  
19 need for mechanical ventilation, oxygen saturation and supplemental oxygen requirement.<sup>19</sup>  
20  
21

22  
23 **(Supplementary table 1)** Severity of illness was categorized into 1) asymptomatic or minimal  
24 symptoms, 2) mild symptoms or uncomplicated upper respiratory tract infection without clinical  
25 or radiographic evidence of pneumonia, 3) mild symptoms with clinical or radiographic evidence  
26 of pneumonia, 4) severely ill, and 5) critically ill.<sup>19</sup>  
27  
28  
29  
30  
31  
32

33  
34  
35 We created a timeline of newly diagnosed cases to study the progression of the epidemic in  
36 Qatar. Key governmental decisions taken by the Supreme Committee for Crisis Management  
37 and the Council of Ministers in response to the epidemic were marked on the timeline to show  
38 their temporal relation to the cases. Multivariable logistic regression was used to determine  
39 factors associated with severe and critical illness. Covariates of interest included in the model  
40 were age, gender, nationality and presence of comorbidities. Comorbidities with a total count of  
41 less than 15 were excluded because of the small numbers.  
42  
43  
44  
45  
46  
47  
48  
49  
50  
51  
52  
53  
54  
55  
56  
57  
58  
59  
60

1  
2  
3  
4  
5 Changes in population movement was assessed using Google mobility reports, a publicly  
6 available tool that tracks movement of people who use mobile applications like Google Maps.<sup>20</sup>  
7  
8 They show changes in visits and length of stay at various locations compared to a baseline.  
9  
10 Baseline was the median value, for the corresponding day of the week, during the 5-week  
11  
12 period between January 3, 2020 and February 6, 2020.<sup>20</sup>  
13  
14  
15

### 16 17 18 *Ethical Approval*

19  
20 The Institutional Review Board at Hamad Medical Corporation approved this study with an  
21  
22 expedited status due to the emergency pandemic status of the COVID-19 outbreak.  
23  
24  
25

### 26 27 *Patient and Public Involvement*

28 This study was conducted in response to a national and global public health emergency. There  
29  
30 was no patient or public involvement. However, key elements of the data are shared with the  
31  
32 public on a daily basis.  
33  
34  
35

### 36 37 **Results**

38  
39 Between February 5, 2020 and April 18, 2020 (11:00 AM local time), 60,645 persons were  
40  
41 tested for SARS-CoV-2, of whom 5,685 were confirmed positive. Before the first case was  
42  
43 diagnosed, testing for SARS-CoV-2 focused on those with influenza-like illness and severe  
44  
45 acute respiratory infection. The first cases were identified among quarantined travelers returning  
46  
47 to Qatar on February 28, 2020, followed by the identification of a large cluster of over 300  
48  
49 infections on March 6, 2020 among expatriate craft and manual workers. Following the  
50  
51 discovery of the first community cluster, testing was expanded to include contacts of new cases,  
52  
53 persons in hotspots, that is areas where infections were diagnosed, individuals with suspected  
54  
55 infection or suggestive symptoms, and travelers coming or returning to Doha. The rapid  
56  
57  
58  
59  
60

1  
2  
3 expansion of testing created a backlog, which was resolved through an investment in testing  
4 infrastructure that significantly increased the testing capacity to approximately 4,000 tests per  
5 day.  
6  
7  
8  
9

10  
11 The number of new cases diagnosed by date of diagnosis is presented in **figure 1**. The  
12 epidemiologic curve showed two distinct patterns of infection transmission. A larger and  
13 sustained community transmission was observed among expatriate workers, predominantly  
14 among craft and manual workers, which subsequently reached other population segments. A  
15 second smaller cluster among Qatari nationals returning from overseas during the study period  
16 was not sustained over time. Subsequent smaller case clusters among Qatari nationals were  
17 traced to the local community. The number of tests performed per day and the number testing  
18 positive is provided in **supplementary figure 1**. The positivity rate, that is number of tests  
19 positive over total number of tests, is shown in **figure 2**. The positivity rate increased steadily  
20 with time, with somewhat of an accelerated rate after April 5, 2020.  
21  
22  
23  
24  
25  
26  
27  
28  
29  
30  
31  
32  
33  
34

35 The median age (IQR) of the infected persons was 34 (28,43) years and 88.9% were male  
36 **(Table 1)**. Other baseline characteristics are also shown in **table 1**. The nationalities with  
37 highest frequency of infection were Indian (27.4%), Bangladeshi (18.9%), Nepalese (18.4%),  
38 Qatari (8.7%), and Pakistani (6.2%). The most common comorbidities were hypertension  
39 (6.9%), diabetes mellitus (6.0%), cardiovascular disease (4.4%) and chronic lung disease  
40 (3.0%). Comorbidity data were missing for 235 persons (4.1%). Among all infected persons,  
41 4,753 (83.6%) had no known comorbidity and 697 (12.3%) had at least one comorbidity. An  
42 overwhelming majority of infected persons (90.9%) were either asymptomatic or had minimal  
43 symptoms, 0.8% had mild illness without evidence of pneumonia, 2.3% had mild illness with  
44 pneumonia, and 2% were severe or critically ill. Severity of illness data were missing for 223  
45 (3.9%) persons. **(Table 1)**  
46  
47  
48  
49  
50  
51  
52  
53  
54  
55  
56  
57  
58  
59  
60

1  
2  
3  
4  
5 A larger proportion of persons with mild illness with or without pneumonia and those with severe  
6 or critical illness had at least one comorbidity. **(Table 2)** Compared to those with asymptomatic  
7 or minimally symptomatic illness, prevalence of most comorbidities was 3-4 times higher among  
8 those with mild disease with or without pneumonia or severe/critical illness. Severity of illness by  
9 number of comorbidities is shown in **table 3**. Among persons with no comorbidity, 96.1% were  
10 asymptomatic or had minimal symptoms, 2.5% had mild illness with or without pneumonia, and  
11 1.4% were severely or critical ill. Among persons with 2 or more comorbidities, 82.1% were  
12 asymptomatic or had minimal symptoms, 10.9% had mild illness with or without pneumonia, and  
13 7.1% were severely or critical ill. **(Table 3)**

14  
15  
16  
17  
18  
19  
20  
21  
22  
23  
24  
25  
26 Seven deaths were observed during the time interval studied, corresponding to a case-fatality  
27 rate of 1.2 per 1,000 cases. All seven deaths were males aged 40-88 years. All except one (74  
28 years old male) had comorbidities, including diabetes (5 subjects), cardiovascular disease (5  
29 subjects) and hypertension (3 subjects). One patient, 58 years old had 5 comorbidities  
30 (diabetes, hypertension, cardiovascular disease, chronic kidney and liver disease). In a  
31 multivariable logistic regression model, presence of hypertension (OR 3.49; 95% CI 1.83,6.68)  
32 or diabetes (OR 3.17; 95% CI 1.76,5.71) were associated with a higher risk of severe or critical  
33 disease. **(Table 4)** Cardiovascular disease, chronic lung disease, chronic kidney disease and  
34 solid organ malignancy were not associated with a higher risk. We repeated the logistic  
35 regression analysis after excluding those with missing data and the results were nearly identical.  
36  
37 **(Supplementary table 2)** We also repeated the analysis using number of comorbidities as  
38 covariates. Presence of any single comorbidity (OR 5.43, 95% CI 3.41,8.63) or any 3 or more  
39 comorbidities (OR 6.16, 95% CI 3.35,11.32) were associated with a higher risk of severe or  
40 critical illness. **(Supplementary table 3)**

1  
2  
3 In a subsequent report in which the first 5,000 patients with COVID-19 infection in Qatar were  
4 followed for up to 60 days after diagnosis, a total of 1,424 patients (28.5%) required  
5 hospitalization, out of which 108 (7.6%) were admitted to ICU, 14 patients (0.28%) had died, 10  
6 (0.2%) were still in hospital, and two (0.04%) were still in ICU.<sup>21</sup>  
7  
8  
9  
10

11  
12  
13 Google mobility reports data demonstrated a significant decrease in number of people visiting  
14 retail and recreation outlets, grocery and pharmacy stores, parks, transit stations and  
15 workplaces over time. **(Table 5)** A concurrent increase in people staying in residential areas  
16 was observed over this timeframe. A snapshot on April 17 shows a 69% reduction in visits to  
17 retail and recreation areas, a 44% reduction in visits to grocery and pharmacy stores, a 64%  
18 decrease in visits to parks, a 68% decrease in visits to transit stations and a 38% decrease in  
19 visits to workplaces. A 21% increase in people at residential areas was observed on this date.  
20  
21  
22  
23  
24  
25  
26  
27  
28  
29  
30  
31

## 32 Discussion

33 We provide a characterization of the SARS-CoV-2 outbreak in Qatar, which offers new insights  
34 into the behavior of the pandemic in a unique demographic setting.  
35  
36  
37  
38  
39  
40

41 The first case in Qatar was identified on February 28, 2020, among returning travelers, which is  
42 nearly 9 weeks after the first cluster was reported from Wuhan, China.<sup>22</sup> During this time,  
43 infection had spread to multiple countries over four continents. This was also a critical time  
44 during which the State of Qatar formulated a national plan to respond to the anticipated cases.  
45 Testing for SARS-CoV-2 started in Qatar on February 5, 2020 and the first major cluster of  
46 cases was identified on March 8, 2020 where over 300 cases were linked to 4 expatriate  
47 workers through aggressive contact tracing. Such aggressive identification and contact tracing  
48 and testing were probably the reasons for a small number of daily new cases till March 31,  
49  
50  
51  
52  
53  
54  
55  
56  
57  
58  
59  
60

1  
2  
3 2020. At that time, a large number of returning travelers and nationals were identified to have  
4 infection. The number of daily diagnosed infections accelerated in April, in part due to a large  
5 increase in number of daily tests, but also reflecting expansion of the epidemic in the wider  
6 population. This trend occurred predominantly in expatriate workers often living in more  
7 crowded areas and accommodations with frequent social mixing despite a national campaign to  
8 discourage peoples' movement except in urgent situations. The epidemic, however, eventually  
9 reached a larger population.  
10  
11  
12  
13  
14  
15  
16  
17  
18  
19

20 An overwhelming majority (>90%) of confirmed COVID-19 cases were asymptomatic or with  
21 minimal symptoms not requiring urgent medical care or hospitalization. This is likely due to the  
22 younger age of the population (mean age 35.8 years) and overall absence of any comorbidities  
23 in the vast majority of the infected persons. This reinforces our current understanding of the  
24 disease being mild or asymptomatic in a majority of the persons, particularly among the younger  
25 and healthier persons, as well as the strong role of age in the epidemiology of this infection.  
26 Similar to other studies, presence of comorbidities was associated with severe or critical  
27 disease.<sup>1</sup> We found a very low mortality among confirmed COVID-19 patients in Qatar, which  
28 may at least partly be attributable both to the timely and effective response of the health system  
29 and the demographic characteristics of the infected persons. It is conceivable that right  
30 censoring with the time delay between onset of disease to death may play a part, though  
31 similarly very low mortality after the study period ended does not support this. The role that  
32 factors such as free access to high quality medical care for everybody in Qatar, availability of a  
33 high number of critical care beds, or differences in viral subtypes, played, needs further study.  
34  
35  
36  
37  
38  
39  
40  
41  
42  
43  
44  
45  
46  
47  
48  
49  
50

51 In response to the spread of COVID-19, the country took a series of public health measures,  
52 including limiting incoming passenger flights into Doha through Hamad International Airport and  
53 providing free state quarantine facilities for returning travelers. A host of other measures were  
54  
55  
56  
57  
58  
59  
60

1  
2  
3 implemented gradually that promoted physical distancing including, closing retail stores in malls  
4 and shopping centers, closing entertainment and dining facilities, postponing or canceling large  
5 sports events and conferences, suspending classes in schools and universities, and mandating  
6 working from home for 80% of workers in the public and private sectors. The healthcare system  
7 was also reorganized to prioritize COVID-19 response over routine services. All positive cases  
8 including those without symptoms were admitted to isolation facilities by the public healthcare  
9 system. These public health measures were heavily promoted and widely communicated  
10 through social and traditional media outlets to all segments of society. Mobility data shows a  
11 significant reduction in visits to common retail, recreation, transit and workplace areas, which  
12 may have contributed to a reduction in spread of infection. There was a more pronounced  
13 reduction in mobility in the weeks following April 5th, which coincides with the significant rise in  
14 the reported number of positive cases.  
15  
16  
17  
18  
19  
20  
21  
22  
23  
24  
25  
26  
27  
28  
29

30 The pandemic has affected nearly every country and territory in the world. However, infection  
31 rates and case fatality rates vary widely among countries. For example, crude case fatality rate  
32 is 3.2% in the US, 7.5% in Canada, 15% in the UK, but only 0.16% in Qatar and 0.67% in  
33 Kuwait (as of August 10, 2020).<sup>23</sup> It has been postulated that the population demographics and  
34 comorbidity burden are the key determinants of the variability in case fatality rates. However,  
35 these differences alone are unlikely to fully account for the widely variable case fatality rates.  
36 Testing per capita, seroprevalence among the general population, availability of acute and  
37 intensive care beds, living arrangements of infected persons and access to promising  
38 therapeutic options may provide additional explanations for the difference.  
39  
40  
41  
42  
43  
44  
45  
46  
47  
48  
49

50  
51 Strengths of our study include unified contact tracing and testing, with all testing done at a  
52 single lab. All tests performed in the State of Qatar were included, providing a robust national  
53 estimate of the number of infected persons among those tested. There are limitations to our  
54  
55  
56  
57  
58  
59  
60

1  
2  
3 study. Comorbidities were retrieved from the electronic medical records using ICD-10 AM  
4 codes. Exact geographic location and contact tracing data were not included in the current  
5 report. Our study end date was April 18, 2020, and all persons with confirmed infection till that  
6 date were included. However, it is possible that some persons may have progressed to more  
7 severe disease after this date. Some of these data are the subject of another report with a brief  
8 summary provided in the preceding paragraph. Finally, the testing for COVID-19 during the  
9 study period was not population based which may affect the true infection rates and outcomes.  
10  
11  
12  
13  
14  
15  
16  
17  
18  
19

20 In conclusion, we describe the evolution of COVID-19 epidemic in the State of Qatar. For the  
21 population tested, the epidemic predominantly affected males and younger population and was  
22 associated with no or minimal symptoms in a vast majority of the infected persons.  
23  
24

25 Hypertension and diabetes were associated, but increasing age was not associated with a  
26 higher risk of severe or critical illness. Public health measures were instituted early and may  
27 have led to the slower growth compared with other countries which delayed such measures.  
28  
29  
30  
31  
32  
33  
34  
35  
36  
37  
38  
39  
40  
41  
42  
43  
44  
45  
46  
47  
48  
49  
50  
51  
52  
53  
54  
55  
56  
57  
58  
59  
60



**Funding**

None

**Competing interests:**

None of the authors have any financial conflict of interest related to this article.

H.E. Dr. Hanan. M. Al Kuwari is the Minister of Public Health for the State of Qatar.

**Ethical Approval**

This study was approved by the Institutional Review Board at Hamad Medical Corporation.

(MRC-05-011)

**Patient Consent**

A waiver of informed consent was granted.

**Data Sharing Statement**

No additional data are available

**Patient of Public Involvement**

There was not patient or public involvement in the design, conduct or reporting of this study.

**Transparency declaration**

The lead author (the manuscript's guarantor) affirms that the manuscript is an honest, accurate, and transparent account of the study being reported; that no important aspects of the study have been omitted; and that any discrepancies from the study as planned (and, if relevant, registered) have been explained.

1  
2  
3  
4  
5  
6  
7  
8  
9  
10  
11  
12  
13  
14  
15  
16  
17  
18  
19  
20  
21  
22  
23  
24  
25  
26  
27  
28  
29  
30  
31  
32  
33  
34  
35  
36  
37  
38  
39  
40  
41  
42  
43  
44  
45  
46  
47  
48  
49  
50  
51  
52  
53  
54  
55  
56  
57  
58  
59  
60

**Dissemination declaration**

Dissemination to study participants or patient organizations is not possible/applicable.

For peer review only

Table 1. Characteristics of 5,685 patients with confirmed COVID-19 infection in Qatar between February 29 and April 18, 2020.

| Variable                | N (%)         |
|-------------------------|---------------|
| <b>Demographics</b>     |               |
| Mean age, years (SD)    | 35.8 (12.0)   |
| Median age, years (IQR) | 34 (28,43)    |
| 0-20 years              | 302 (5.3%)    |
| 21-40 years             | 3,666 (64.5%) |
| 41-60 years             | 1,537 (27.0%) |
| >60 years               | 180 (3.2%)    |
| Male sex                | 5,052 (88.9%) |
| <b>Nationality</b>      |               |
| Indian                  | 1,559 (27.4%) |
| Bangladeshi             | 1,077 (18.9%) |
| Nepalese                | 1,047 (18.4%) |
| Qatari                  | 497 (8.7%)    |
| Pakistani               | 353 (6.2%)    |
| Filipino                | 185 (3.3%)    |
| Egyptian                | 179 (3.1%)    |
| Sri Lankan              | 109 (1.9%)    |
| Sudanese                | 91 (1.6%)     |
| Others                  | 588 (10.3%)   |
| <b>Comorbidities</b>    |               |
| Hypertension            | 391 (6.9%)    |
| Diabetes mellitus       | 344 (6.0%)    |

|                                       |               |
|---------------------------------------|---------------|
| Cardiovascular disease                | 250 (4.4%)    |
| Chronic lung disease                  | 169 (3.0%)    |
| Chronic kidney disease                | 35 (0.6%)     |
| Solid organ malignancy                | 30 (0.5%)     |
| Tuberculosis                          | 13 (0.2%)     |
| Chronic liver disease                 | 12 (0.2%)     |
| Autoimmune disease                    | 6 (0.1%)      |
| Missing                               | 235 (4.1%)    |
| Number of comorbidities (235 missing) |               |
| 0                                     | 4,753 (83.6%) |
| 1                                     | 384 (6.8%)    |
| 2                                     | 139 (2.5%)    |
| 3                                     | 121 (2.1%)    |
| ≥4                                    | 53 (0.9%)     |
| Missing                               | 235 (4.1%)    |
| Severity of illness                   |               |
| Asymptomatic or minimal symptoms      | 5,168 (90.9%) |
| Mild illness without pneumonia        | 44 (0.8%)     |
| Mild illness with pneumonia           | 133 (2.3%)    |
| Severe illness                        | 82 (1.4%)     |
| Critical illness                      | 35 (0.6%)     |
| Missing                               | 223 (3.9%)    |

Table 2. Prevalence of comorbidities by severity of illness.

|                        | <b>Asymptomatic or minimally symptomatic</b> | <b>Mild illness with or without pneumonia</b> | <b>Severe/critical illness</b> |
|------------------------|----------------------------------------------|-----------------------------------------------|--------------------------------|
|                        | <b>N (%)</b>                                 | <b>N (%)</b>                                  | <b>N (%)</b>                   |
| Hypertension           | 317 (6.1)                                    | 41 (23.2)                                     | 31 (26.5)                      |
| Diabetes mellitus      | 281 (5.4)                                    | 33 (18.6)                                     | 30 (25.6)                      |
| Cardiovascular disease | 199 (3.8)                                    | 31 (17.5)                                     | 19 (16.2)                      |
| Chronic lung disease   | 145 (2.8)                                    | 12 (6.8)                                      | 10 (8.6)                       |
| Chronic kidney disease | 25 (0.5)                                     | 6 (3.4)                                       | 4 (3.4)                        |
| Solid organ malignancy | 26 (0.5)                                     | 2 (1.1)                                       | 2 (1.7)                        |
| Tuberculosis           | 10 (0.2)                                     | 2 (1.1)                                       | 1 (0.8)                        |
| Chronic liver disease  | 10 (0.2)                                     | 2 (1.1)                                       | 0 (0)                          |
| Autoimmune disease     | 5 (0.1)                                      | 1 (0.6)                                       | 0 (0)                          |

1  
2  
3  
4  
5  
6  
7  
8  
9  
10  
11  
12  
13  
14  
15  
16  
17  
18  
19  
20  
21  
22  
23  
24  
25  
26  
27  
28  
29  
30  
31  
32  
33  
34  
35  
36  
37  
38  
39  
40  
41  
42  
43  
44  
45  
46  
47

Table 3. Severity of illness by number of comorbidities

| <b>Number of comorbidities</b> | <b>Asymptomatic or minimal symptoms, N (%)</b> | <b>Mild illness with or without pneumonia, N (%)</b> | <b>Severe/critical illness, N (%)</b> |
|--------------------------------|------------------------------------------------|------------------------------------------------------|---------------------------------------|
| No comorbidity                 | 4,582 (96.1%)                                  | 120 (2.5%)                                           | 67 (1.4%)                             |
| Only 1 comorbidity             | 330 (86.6%)                                    | 23 (6.0%)                                            | 28 (7.3%)                             |
| 2 or more comorbidities        | 256 (82.1%)                                    | 34 (10.9%)                                           | 22 (7.1%)                             |

Peer review only

Table 4. Factors associated with severe or critical illness (multivariable logistic regression model).

| Variables                           | Odds Ratio | [95% Conf. Interval] |      | P-value |
|-------------------------------------|------------|----------------------|------|---------|
| Age                                 |            |                      |      |         |
| 0-20 years (reference)              | reference  |                      |      |         |
| 21-40 years                         | 1.51       | 0.46                 | 4.93 | 0.62    |
| 41-60 years                         | 1.57       | 0.45                 | 5.46 | 0.55    |
| 60+ years                           | 1.39       | 0.3                  | 6.49 | 0.94    |
| Male gender                         | 0.98       | 0.53                 | 1.83 | 0.95    |
| Qatari nationality (vs. non-Qatari) | 0.83       | 0.43                 | 1.6  | 0.58    |
| Hypertension                        | 3.49       | 1.83                 | 6.68 | 0.0002  |
| Diabetes mellitus                   | 3.17       | 1.76                 | 5.71 | 0.0001  |
| Cardiovascular disease              | 0.54       | 0.24                 | 1.22 | 0.14    |
| Chronic lung disease                | 1.64       | 0.79                 | 3.42 | 0.19    |
| Chronic kidney disease              | 1.31       | 0.41                 | 4.21 | 0.65    |
| Cancer                              | 1.26       | 0.28                 | 5.66 | 0.77    |

Table 5. Relative change in people visiting areas of common interest in the State of Qatar.

(Comparison period January 3, 2020 – February 6, 2020)

|                     | Qatar March 29 | Qatar April 5 | Qatar April 11 | Qatar April 17 |
|---------------------|----------------|---------------|----------------|----------------|
| Retail & Recreation | -51%           | -50%          | -63%           | -69%           |
| Grocery & Pharmacy  | -25%           | -21%          | -35%           | -44%           |
| Parks               | -34%           | -35%          | -48%           | -64%           |
| Transit stations    | -52%           | -52%          | -60%           | -68%           |
| Workplaces          | -31%           | -36%          | -39%           | -38%           |
| Residential         | +22%           | +24%          | +23%           | +21%           |



Figure 1. Epidemiologic curve of patients with COVID-19 in Qatar.

For peer review only

Figure 2. Positivity rate among those tested for SARS-CoV-2 active infection by swab day.

For peer review only

## References

1. Zhu N, Zhang D, Wang W, et al. A Novel Coronavirus from Patients with Pneumonia in China, 2019. *N Engl J Med* 2020;382:727-33.
2. Chen N, Zhou M, Dong X, et al. Epidemiological and clinical characteristics of 99 cases of 2019 novel coronavirus pneumonia in Wuhan, China: a descriptive study. *Lancet* 2020;395:507-13.
3. Huang C, Wang Y, Li X, et al. Clinical features of patients infected with 2019 novel coronavirus in Wuhan, China. *Lancet* 2020;395:497-506.
4. Wang D, Hu B, Hu C, et al. Clinical Characteristics of 138 Hospitalized Patients With 2019 Novel Coronavirus-Infected Pneumonia in Wuhan, China. *JAMA* 2020.
5. Lu R, Zhao X, Li J, et al. Genomic characterisation and epidemiology of 2019 novel coronavirus: implications for virus origins and receptor binding. *Lancet* 2020;395:565-74.
6. Phan LT, Nguyen TV, Luong QC, et al. Importation and Human-to-Human Transmission of a Novel Coronavirus in Vietnam. *N Engl J Med* 2020;382:872-4.
7. Young BE, Ong SWX, Kalimuddin S, et al. Epidemiologic Features and Clinical Course of Patients Infected With SARS-CoV-2 in Singapore. *JAMA* 2020.
8. Holshue ML, DeBolt C, Lindquist S, et al. First Case of 2019 Novel Coronavirus in the United States. *N Engl J Med* 2020;382:929-36.
9. Lescure FX, Bouadma L, Nguyen D, et al. Clinical and virological data of the first cases of COVID-19 in Europe: a case series. *Lancet Infect Dis* doi 10.1016/S1473-3099(20)30200-0 2020.
10. Oksanen A, Kaakinen M, Latikka R, Savolainen I, Savela N, Koivula A. Regulation and Trust: 3-Month Follow-up Study on COVID-19 Mortality in 25 European Countries. *JMIR Public Health Surveill* 2020;6:e19218.
11. <https://worldpopulationreview.com/countries/qatar-population/> Accessed 21 April 2020. 2020.
12. Wu C, Chen X, Cai Y, et al. Risk Factors Associated With Acute Respiratory Distress Syndrome and Death in Patients With Coronavirus Disease 2019 Pneumonia in Wuhan, China. *JAMA internal medicine* 2020.
13. Zhou F, Yu T, Du R, et al. Clinical course and risk factors for mortality of adult inpatients with COVID-19 in Wuhan, China: a retrospective cohort study. *Lancet* 2020;395:1054-62.
14. Nour M, Alhajri M, Farag E, et al. How Do the First Days Count? A Case Study of Qatar Experience in Emergency Risk Communication during the MERS-CoV Outbreak. *Int J Environ Res Public Health* 2017;14.
15. Farag E, Nour M, Islam MM, et al. Qatar experience on One Health approach for middle-east respiratory syndrome coronavirus, 2012-2017: A viewpoint. *One Health* 2019;7:100090.
16. CDC. Contact tracing for COVID-19. <https://www.cdc.gov/coronavirus/2019-ncov/php/contact-tracing/contact-tracing-plan/contact-tracing.html> accessed August 18, 2020 2020.
17. ThermoFisher. TaqPath COVID-19 Combo Kit: Instructions for Use: [https://assets.thermofisher.com/TFS-Assets/LSG/manuals/MAN0019372\\_TaqPathCOVID-19\\_Kit\\_Australia\\_NZ\\_IFU.pdf](https://assets.thermofisher.com/TFS-Assets/LSG/manuals/MAN0019372_TaqPathCOVID-19_Kit_Australia_NZ_IFU.pdf) accessed August 18, 2020.
18. Roche. cobas® SARS-CoV-2 Test. <https://diagnostics.roche.com/us/en/products/params/cobas-sars-cov-2-test.html> Accessed August 18, 2020.
19. WHO. Clinical management of severe acute respiratory infection when COVID-19 disease is suspected. file:///C:/Users/aabutt/Downloads/WHO-2019-nCoV-clinical-20204-engpdf Accessed 24 April 2020 2020.
20. GOOGLE. <https://www.google.com/covid19/mobility/> Accessed 25 April 2020. 2020.

- 1
- 2
- 3 21. Omrani AS, Almaslamani MA, Daghfal J, et al. The First Consecutive 5000 Patients with
- 4 Coronavirus Disease 2019 from Qatar; a Nation-wide Cohort Study. medRxiv
- 5 2020:2020.07.15.20154690.
- 6 22. WHO. <https://www.who.int/news-room/detail/08-04-2020-who-timeline---covid-19>
- 7 accessed 21 April 2020.
- 8 23. Worldometer. Coronavirus updates.
- 9 [https://www.worldometers.info/coronavirus/?utm\\_campaign=homeAdTOA](https://www.worldometers.info/coronavirus/?utm_campaign=homeAdTOA)? Accessed August
- 10 10, 2020.
- 11
- 12
- 13
- 14
- 15
- 16
- 17
- 18
- 19
- 20
- 21
- 22
- 23
- 24
- 25
- 26
- 27
- 28
- 29
- 30
- 31
- 32
- 33
- 34
- 35
- 36
- 37
- 38
- 39
- 40
- 41
- 42
- 43
- 44
- 45
- 46
- 47
- 48
- 49
- 50
- 51
- 52
- 53
- 54
- 55
- 56
- 57
- 58
- 59
- 60

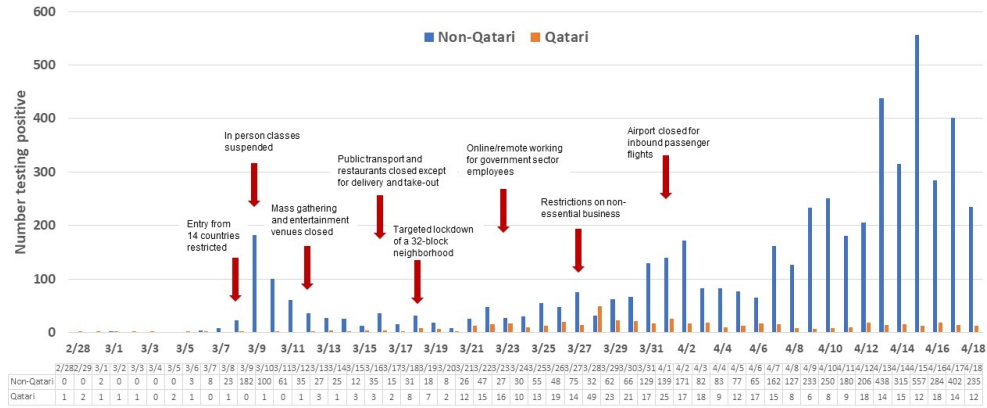

Figure 1

54x30mm (600 x 600 DPI)

1  
2  
3  
4  
5  
6  
7  
8  
9  
10  
11  
12  
13  
14  
15  
16  
17  
18  
19  
20  
21  
22  
23  
24  
25  
26  
27  
28  
29  
30  
31  
32  
33  
34  
35  
36  
37  
38  
39  
40  
41  
42  
43  
44  
45  
46  
47  
48  
49  
50  
51  
52  
53  
54  
55  
56  
57  
58  
59  
60

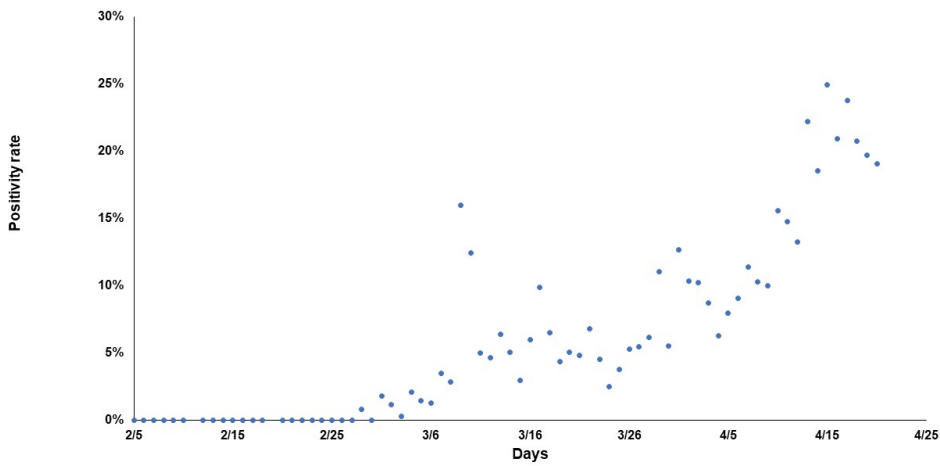

Figure 2

54x30mm (600 x 600 DPI)

Supplementary figure. Number of tests done and number of persons who tested positive per day.

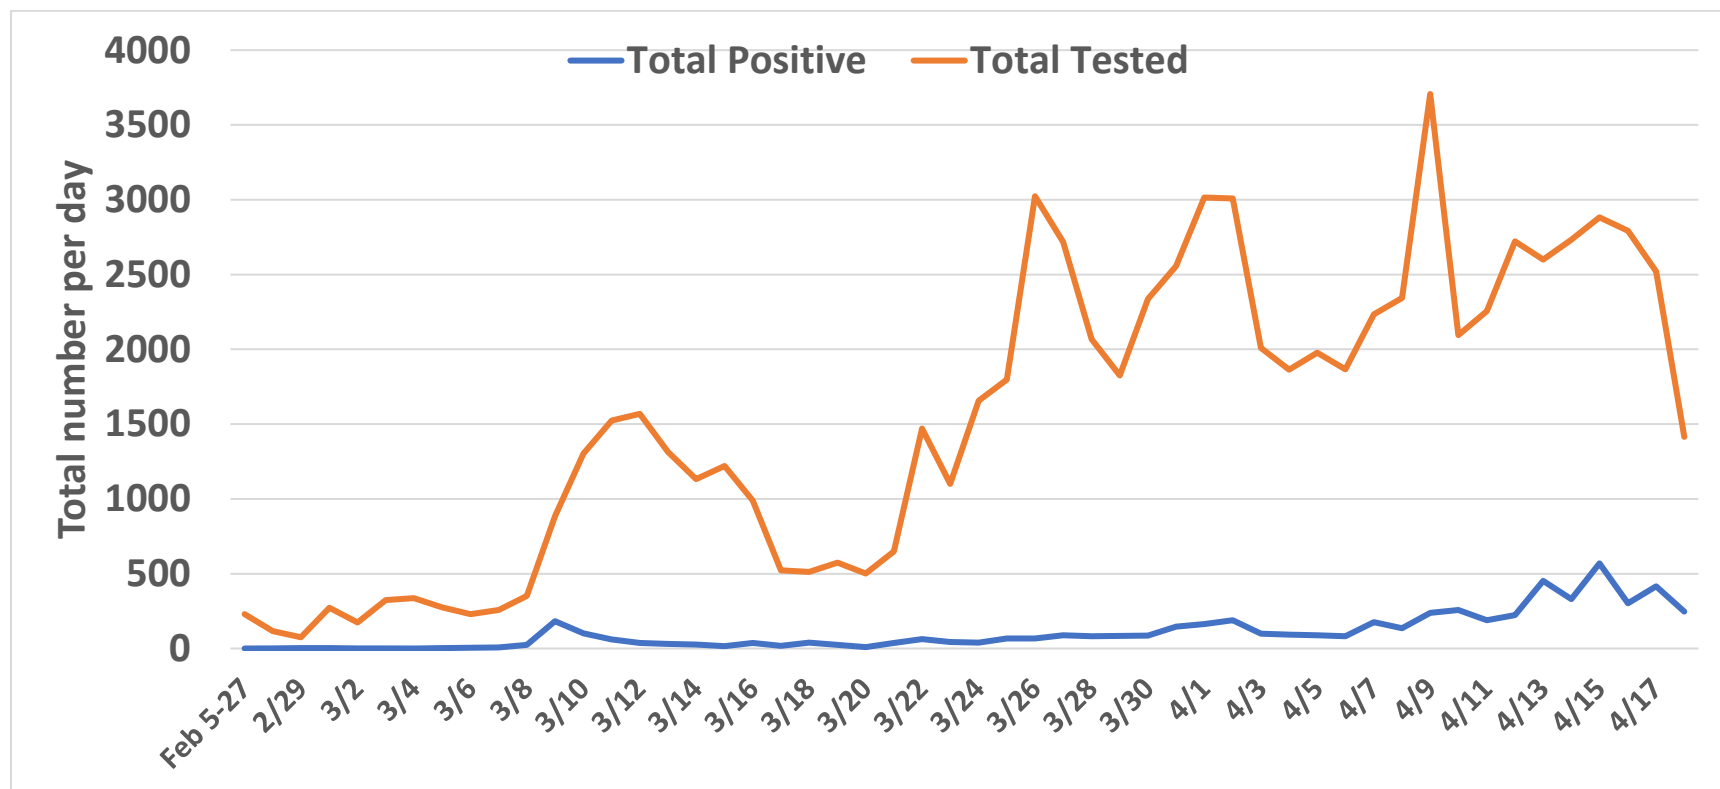

Supplementary table. World Health Organization definitions of severity of illness in persons with COVID-19 infection.

| Category |                                     | Definition                                                                                                                                                                                                                                                                                                                                                                                                                                                                                                                                                                                                                                                                                                                                                                                                                                                                                                                                                                                                                                                                                                                                                                                               |
|----------|-------------------------------------|----------------------------------------------------------------------------------------------------------------------------------------------------------------------------------------------------------------------------------------------------------------------------------------------------------------------------------------------------------------------------------------------------------------------------------------------------------------------------------------------------------------------------------------------------------------------------------------------------------------------------------------------------------------------------------------------------------------------------------------------------------------------------------------------------------------------------------------------------------------------------------------------------------------------------------------------------------------------------------------------------------------------------------------------------------------------------------------------------------------------------------------------------------------------------------------------------------|
| Mild     |                                     | <p>Patients with uncomplicated upper respiratory tract viral infection, may have non-specific symptoms such as fever, fatigue, cough (with or without sputum production), anorexia, malaise, muscle pain, sore throat, dyspnea, nasal congestion, or headache. Rarely, patients may also present with diarrhoea, nausea and vomiting.</p> <p>The elderly and immunosuppressed may present with atypical symptoms. Symptoms due to physiologic adaptations of pregnancy or adverse pregnancy events, such as e.g. dyspnea, fever, GI-symptoms or fatigue, may overlap with COVID-19 symptoms.</p>                                                                                                                                                                                                                                                                                                                                                                                                                                                                                                                                                                                                         |
|          | Pneumonia                           | <p>Adult with pneumonia but no signs of severe pneumonia and no need for supplemental oxygen.</p> <p>Child with non-severe pneumonia who has cough or difficulty breathing + fast breathing: fast breathing (in breaths/min): &lt; 2 months: <math>\geq 60</math>; 2–11 months: <math>\geq 50</math>; 1–5 years: <math>\geq 40</math>, and no signs of severe pneumonia.</p>                                                                                                                                                                                                                                                                                                                                                                                                                                                                                                                                                                                                                                                                                                                                                                                                                             |
| Severe   | Severe pneumonia                    | <p>Adolescent or adult: fever or suspected respiratory infection, plus one of: respiratory rate <math>&gt; 30</math> breaths/min; severe respiratory distress; or <math>SpO_2 \leq 93\%</math> on room air.</p> <p>Child with cough or difficulty in breathing, plus at least one of the following: central cyanosis or <math>SpO_2 &lt; 90\%</math>; severe respiratory distress (e.g. grunting, very severe chest indrawing); signs of pneumonia with a general danger sign: inability to breastfeed or drink, lethargy or unconsciousness, or convulsions. Other signs of pneumonia may be present: chest indrawing, fast breathing (in breaths/min): &lt; 2 months: <math>\geq 60</math>; 2–11 months: <math>\geq 50</math>; 1–5 years: <math>\geq 40</math>. While the diagnosis is made on clinical grounds; chest imaging may identify or exclude some pulmonary complications.</p>                                                                                                                                                                                                                                                                                                               |
| Critical | Acute respiratory distress syndrome | <p>Onset: within 1 week of a known clinical insult or new or worsening respiratory symptoms.</p> <p>Chest imaging (radiograph, CT scan, or lung ultrasound): bilateral opacities, not fully explained by volume overload, lobar or lung collapse, or nodules.</p> <p>Origin of pulmonary infiltrates: respiratory failure not fully explained by cardiac failure or fluid overload.</p> <p>Need objective assessment (e.g. echocardiography) to exclude hydrostatic cause of infiltrates/oedema if no risk factor present.</p> <p>Oxygenation impairment in adults:</p> <p>Mild ARDS: <math>200 \text{ mmHg} &lt; PaO_2/FiO_2 \leq 300 \text{ mmHg}</math> (with PEEP or CPAP <math>\geq 5 \text{ cmH}_2\text{O}</math>, or non-ventilated)</p> <p>Moderate ARDS: <math>100 \text{ mmHg} &lt; PaO_2/FiO_2 \leq 200 \text{ mmHg}</math> (with PEEP <math>\geq 5 \text{ cmH}_2\text{O}</math>, or non-ventilated)</p> <p>Severe ARDS: <math>PaO_2/FiO_2 \leq 100 \text{ mmHg}</math> (with PEEP <math>\geq 5 \text{ cmH}_2\text{O}</math>, or non-ventilated)</p> <p>When <math>PaO_2</math> is not available, <math>SpO_2/FiO_2 \leq 315</math> suggests ARDS (including in non-ventilated patients).</p> |



|  |              |                                                                                                                                                                                                                                                                                                                                                                                                                                                                                                                                                                                                                                                                                                                             |
|--|--------------|-----------------------------------------------------------------------------------------------------------------------------------------------------------------------------------------------------------------------------------------------------------------------------------------------------------------------------------------------------------------------------------------------------------------------------------------------------------------------------------------------------------------------------------------------------------------------------------------------------------------------------------------------------------------------------------------------------------------------------|
|  |              | <p>Oxygenation impairment in children: note OI = Oxygenation Index and OSI = Oxygenation Index using SpO<sub>2</sub>. Use PaO<sub>2</sub>-based metric when available. If PaO<sub>2</sub> not available, wean FiO<sub>2</sub> to maintain SpO<sub>2</sub> ≤ 97% to calculate OSI or SpO<sub>2</sub>/FiO<sub>2</sub> ratio:</p> <p>Bilevel (NIV or CPAP) ≥ 5 cmH<sub>2</sub>O via full face mask: PaO<sub>2</sub>/FiO<sub>2</sub> ≤ 300 mmHg or SpO<sub>2</sub>/FiO<sub>2</sub> ≤ 264</p> <p>Mild ARDS (invasively ventilated): 4 ≤ OI &lt; 8 or 5 ≤ OSI &lt; 7.5</p> <p>Moderate ARDS (invasively ventilated): 8 ≤ OI &lt; 16 or 7.5 ≤ OSI &lt; 12.3</p> <p>Severe ARDS (invasively ventilated): OI ≥ 16 or OSI ≥ 12.3.</p> |
|  | Sepsis       | <p>Adults: life-threatening organ dysfunction caused by a dysregulated host response to suspected or proven infection.<sup>1</sup> Signs of organ dysfunction include: altered mental status, difficult or fast breathing, low oxygen saturation, reduced urine output, fast heart rate, weak pulse, cold extremities or low blood pressure, skin mottling, or laboratory evidence of coagulopathy, thrombocytopenia, acidosis, high lactate or hyperbilirubinemia.</p> <p>Children: suspected or proven infection and ≥ 2 aged based systemic inflammatory response syndrome criteria, of which one must be abnormal temperature or white blood cell count.</p>                                                            |
|  | Septic shock | <p>Adults: persisting hypotension despite volume resuscitation, requiring vasopressors to maintain MAP ≥ 65 mmHg and serum lactate level &gt; 2 mmol/L.</p> <p>Children: any hypotension (SBP &lt; 5th centile or &gt; 2 SD below normal for age) or two or three of the following: altered mental state; tachycardia or bradycardia (HR &lt; 90 bpm or &gt; 160 bpm in infants and HR &lt; 70 bpm or &gt; 150 bpm in children); prolonged capillary refill (&gt; 2 sec) or feeble pulse; tachypnea; mottled or cool skin or petechial or purpuric rash; increased lactate; oliguria; hyperthermia or hypothermia.</p>                                                                                                      |

Supplementary table 2. Factors associated with severe or critical illness after excluding those with missing severity of illness data (multivariable logistic regression model).

| Variables                           | Odds Ratio | [95% Conf. Interval] |      | P-value |
|-------------------------------------|------------|----------------------|------|---------|
| Age                                 |            |                      |      |         |
| 0-20 years (reference)              | reference  |                      |      |         |
| 21-40 years                         | 1.51       | 0.46                 | 4.93 | 0.62    |
| 41-60 years                         | 1.57       | 0.45                 | 5.43 | 0.55    |
| 60+ years                           | 1.40       | 0.30                 | 6.55 | 0.94    |
| Male gender                         | 0.98       | 0.53                 | 1.83 | 0.95    |
| Qatari nationality (vs. non-Qatari) | 0.83       | 0.43                 | 1.60 | 0.58    |
| Hypertension                        | 3.48       | 1.82                 | 6.66 | 0.0002  |
| Diabetes mellitus                   | 3.14       | 1.74                 | 5.65 | 0.0001  |
| Cardiovascular disease              | 0.55       | 0.24                 | 1.22 | 0.14    |
| Chronic lung disease                | 1.65       | 0.79                 | 3.43 | 0.19    |
| Chronic kidney disease              | 1.31       | 0.41                 | 4.21 | 0.65    |
| Cancer                              | 1.25       | 0.28                 | 5.65 | 0.77    |

Supplementary table 3. Factors associated with severe or critical illness by number of comorbidities (multivariable logistic regression model).

| Variables                           | Odds Ratio | [95% Conf. Interval] |       | P-value |
|-------------------------------------|------------|----------------------|-------|---------|
| Age                                 |            |                      |       |         |
| 0-20 years (reference)              |            |                      |       |         |
| 21-40 years                         | 1.42       | 0.43                 | 4.67  | 0.75    |
| 41-60 years                         | 1.49       | 0.43                 | 5.19  | 0.65    |
| 60+ years                           | 1.44       | 0.31                 | 6.66  | 0.84    |
| Male gender                         | 0.96       | 0.51                 | 1.78  | 0.89    |
| Qatari nationality (vs. non-Qatari) | 0.83       | 0.43                 | 1.58  | 0.57    |
| Number of comorbidities             |            |                      |       |         |
| 0 (reference)                       |            |                      |       |         |
| Any 1                               | 5.43       | 3.41                 | 8.63  | 0.01    |
| 3 or more                           | 6.16       | 3.35                 | 11.32 | 0.01    |

1  
2  
3  
4  
5  
6  
7  
8  
9  
10  
11  
12  
13  
14  
15  
16  
17  
18  
19  
20  
21  
22  
23  
24  
25  
26  
27  
28  
29  
30  
31  
32  
33  
34  
35  
36  
37  
38  
39  
40  
41  
42  
43  
44  
45  
46  
47  
48  
49  
50  
51  
52  
53  
54  
55  
56  
57  
58  
59  
60

## STROBE Statement—checklist of items that should be included in reports of observational studies

|                          | Item No | Recommendation                                                                                                                                                                                                                                                                                                                                                                                                                                                         |                       |
|--------------------------|---------|------------------------------------------------------------------------------------------------------------------------------------------------------------------------------------------------------------------------------------------------------------------------------------------------------------------------------------------------------------------------------------------------------------------------------------------------------------------------|-----------------------|
| Title and abstract       | 1       | (a) Indicate the study's design with a commonly used term in the title or the abstract                                                                                                                                                                                                                                                                                                                                                                                 |                       |
|                          |         | (b) Provide in the abstract an informative and balanced summary of what was done and what was found                                                                                                                                                                                                                                                                                                                                                                    | Included              |
| <b>Introduction</b>      |         |                                                                                                                                                                                                                                                                                                                                                                                                                                                                        |                       |
| Background/rationale     | 2       | Explain the scientific background and rationale for the investigation being reported                                                                                                                                                                                                                                                                                                                                                                                   | Included              |
| Objectives               | 3       | State specific objectives, including any prespecified hypotheses                                                                                                                                                                                                                                                                                                                                                                                                       | Included              |
| <b>Methods</b>           |         |                                                                                                                                                                                                                                                                                                                                                                                                                                                                        |                       |
| Study design             | 4       | Present key elements of study design early in the paper                                                                                                                                                                                                                                                                                                                                                                                                                | Included              |
| Setting                  | 5       | Describe the setting, locations, and relevant dates, including periods of recruitment, exposure, follow-up, and data collection                                                                                                                                                                                                                                                                                                                                        | Included              |
| Participants             | 6       | (a) <i>Cohort study</i> —Give the eligibility criteria, and the sources and methods of selection of participants. Describe methods of follow-up<br><i>Case-control study</i> —Give the eligibility criteria, and the sources and methods of case ascertainment and control selection. Give the rationale for the choice of cases and controls<br><i>Cross-sectional study</i> —Give the eligibility criteria, and the sources and methods of selection of participants | Included              |
|                          |         | (b) <i>Cohort study</i> —For matched studies, give matching criteria and number of exposed and unexposed<br><i>Case-control study</i> —For matched studies, give matching criteria and the number of controls per case                                                                                                                                                                                                                                                 |                       |
| Variables                | 7       | Clearly define all outcomes, exposures, predictors, potential confounders, and effect modifiers. Give diagnostic criteria, if applicable                                                                                                                                                                                                                                                                                                                               | Included              |
| Data sources/measurement | 8*      | For each variable of interest, give sources of data and details of methods of assessment (measurement). Describe comparability of assessment methods if there is more than one group                                                                                                                                                                                                                                                                                   | Included              |
| Bias                     | 9       | Describe any efforts to address potential sources of bias                                                                                                                                                                                                                                                                                                                                                                                                              | Limitations described |
| Study size               | 10      | Explain how the study size was arrived at                                                                                                                                                                                                                                                                                                                                                                                                                              | Included              |
| Quantitative variables   | 11      | Explain how quantitative variables were handled in the analyses. If applicable, describe which groupings were chosen and why                                                                                                                                                                                                                                                                                                                                           | N/A                   |
| Statistical methods      | 12      | (a) Describe all statistical methods, including those used to control for confounding                                                                                                                                                                                                                                                                                                                                                                                  | Included              |
|                          |         | (b) Describe any methods used to examine subgroups                                                                                                                                                                                                                                                                                                                                                                                                                     | N/A                   |

|                   |     |                                                                                                                                                                                                                                                                                                           |          |
|-------------------|-----|-----------------------------------------------------------------------------------------------------------------------------------------------------------------------------------------------------------------------------------------------------------------------------------------------------------|----------|
|                   |     | and interactions                                                                                                                                                                                                                                                                                          |          |
|                   |     | (c) Explain how missing data were addressed                                                                                                                                                                                                                                                               | N/A      |
|                   |     | (d) <i>Cohort study</i> —If applicable, explain how loss to follow-up was addressed<br><i>Case-control study</i> —If applicable, explain how matching of cases and controls was addressed<br><i>Cross-sectional study</i> —If applicable, describe analytical methods taking account of sampling strategy | N/A      |
|                   |     | (e) Describe any sensitivity analyses                                                                                                                                                                                                                                                                     | N/A      |
| <b>Results</b>    |     |                                                                                                                                                                                                                                                                                                           |          |
| Participants      | 13* | (a) Report numbers of individuals at each stage of study—eg numbers potentially eligible, examined for eligibility, confirmed eligible, included in the study, completing follow-up, and analysed<br>(b) Give reasons for non-participation at each stage<br>(c) Consider use of a flow diagram           | Included |
| Descriptive data  | 14* | (a) Give characteristics of study participants (eg demographic, clinical, social) and information on exposures and potential confounders                                                                                                                                                                  | Included |
|                   |     | (b) Indicate number of participants with missing data for each variable of interest                                                                                                                                                                                                                       |          |
|                   |     | (c) <i>Cohort study</i> —Summarise follow-up time (eg, average and total amount)                                                                                                                                                                                                                          |          |
| Outcome data      | 15* | <i>Cohort study</i> —Report numbers of outcome events or summary measures over time                                                                                                                                                                                                                       | Included |
|                   |     | <i>Case-control study</i> —Report numbers in each exposure category, or summary measures of exposure                                                                                                                                                                                                      |          |
|                   |     | <i>Cross-sectional study</i> —Report numbers of outcome events or summary measures                                                                                                                                                                                                                        |          |
| Main results      | 16  | (a) Give unadjusted estimates and, if applicable, confounder-adjusted estimates and their precision (eg, 95% confidence interval). Make clear which confounders were adjusted for and why they were included                                                                                              | N/A      |
|                   |     | (b) Report category boundaries when continuous variables were categorized                                                                                                                                                                                                                                 |          |
|                   |     | (c) If relevant, consider translating estimates of relative risk into absolute risk for a meaningful time period                                                                                                                                                                                          |          |
| Other analyses    | 17  | Report other analyses done—eg analyses of subgroups and interactions, and sensitivity analyses                                                                                                                                                                                                            | Included |
| <b>Discussion</b> |     |                                                                                                                                                                                                                                                                                                           |          |
| Key results       | 18  | Summarise key results with reference to study objectives                                                                                                                                                                                                                                                  | Included |
| Limitations       | 19  | Discuss limitations of the study, taking into account sources of potential bias or imprecision. Discuss both direction and magnitude of any potential bias                                                                                                                                                | Included |
| Interpretation    | 20  | Give a cautious overall interpretation of results considering objectives, limitations, multiplicity of analyses, results from similar studies, and other relevant evidence                                                                                                                                | Included |
| Generalisability  | 21  | Discuss the generalisability (external validity) of the study results                                                                                                                                                                                                                                     | Included |

|                          |    |                                                                                                                                                               |          |
|--------------------------|----|---------------------------------------------------------------------------------------------------------------------------------------------------------------|----------|
| <b>Other information</b> |    |                                                                                                                                                               |          |
| Funding                  | 22 | Give the source of funding and the role of the funders for the present study and, if applicable, for the original study on which the present article is based | Included |

\*Give information separately for cases and controls in case-control studies and, if applicable, for exposed and unexposed groups in cohort and cross-sectional studies.

**Note:** An Explanation and Elaboration article discusses each checklist item and gives methodological background and published examples of transparent reporting. The STROBE checklist is best used in conjunction with this article (freely available on the Web sites of PLoS Medicine at <http://www.plosmedicine.org/>, Annals of Internal Medicine at <http://www.annals.org/>, and Epidemiology at <http://www.epidem.com/>). Information on the STROBE Initiative is available at [www.strobe-statement.org](http://www.strobe-statement.org).

# BMJ Open

## Epidemiologic Investigation of the First 5,685 Cases of SARS-CoV-2 Infection in Qatar, February 28-April 18, 2020

|                                 |                                                                                                                                                                                                                                                                                                                                                                                                                                                                                                                                                                                                                                                                                                                                                                                                                                                                                                                                                                                                                                                                                                                                                                                                                                                                                                             |
|---------------------------------|-------------------------------------------------------------------------------------------------------------------------------------------------------------------------------------------------------------------------------------------------------------------------------------------------------------------------------------------------------------------------------------------------------------------------------------------------------------------------------------------------------------------------------------------------------------------------------------------------------------------------------------------------------------------------------------------------------------------------------------------------------------------------------------------------------------------------------------------------------------------------------------------------------------------------------------------------------------------------------------------------------------------------------------------------------------------------------------------------------------------------------------------------------------------------------------------------------------------------------------------------------------------------------------------------------------|
| Journal:                        | <i>BMJ Open</i>                                                                                                                                                                                                                                                                                                                                                                                                                                                                                                                                                                                                                                                                                                                                                                                                                                                                                                                                                                                                                                                                                                                                                                                                                                                                                             |
| Manuscript ID                   | bmjopen-2020-040428.R2                                                                                                                                                                                                                                                                                                                                                                                                                                                                                                                                                                                                                                                                                                                                                                                                                                                                                                                                                                                                                                                                                                                                                                                                                                                                                      |
| Article Type:                   | Original research                                                                                                                                                                                                                                                                                                                                                                                                                                                                                                                                                                                                                                                                                                                                                                                                                                                                                                                                                                                                                                                                                                                                                                                                                                                                                           |
| Date Submitted by the Author:   | 03-Sep-2020                                                                                                                                                                                                                                                                                                                                                                                                                                                                                                                                                                                                                                                                                                                                                                                                                                                                                                                                                                                                                                                                                                                                                                                                                                                                                                 |
| Complete List of Authors:       | Al Kuwari, Hanan; Ministry of Public Health Qatar, Office of the Minister of Public Health<br>Abdul Rahim, Hanan; Qatar University, College of Health Sciences<br>Abu-Raddad, Laith; Healthcare policy and research<br>Abou-Samra, Abdul-Badi ; Hamad Medical Corporation, Department of Medicine<br>Al Kanaani, Zaina; Hamad Medical Corporation, Business Intelligence Unit<br>Al Khal, Abdullatif; Hamad Medical Corporation, Department of Medicine<br>Al Kuwari, Einas; Hamad Medical Corporation, Department of Laboratory Medicine<br>Al Marri, salih; Ministry of Public Health Qatar, Office of the Minister of Public Health<br>Al Masalmani, Muna; Hamad Medical Corporation, Department of Medicine<br>Al Romaihi, Hamad; Ministry of Public Health Qatar, Office of the Minister of Public Health<br>Al Thani, Mohammed; Ministry of Public Health Qatar, Office of the Minister of Public Health<br>Coyle, Peter; Hamad Medical Corporation, Department of Laboratory Medicine<br>Latif, Ali; Hamad Medical Corporation, Business Intelligence Unit<br>Owen, Robert; Hamad Medical Corporation, National Ambulance Service<br>Bertollini, Roberto; Ministry of Public Health Qatar, Office of the Minister of Public Health<br>Butt, Adeel; Hamad Medical Corporation, Department of Medicine |
| <b>Primary Subject Heading</b>: | Public health                                                                                                                                                                                                                                                                                                                                                                                                                                                                                                                                                                                                                                                                                                                                                                                                                                                                                                                                                                                                                                                                                                                                                                                                                                                                                               |
| Secondary Subject Heading:      | Epidemiology, Global health, Infectious diseases                                                                                                                                                                                                                                                                                                                                                                                                                                                                                                                                                                                                                                                                                                                                                                                                                                                                                                                                                                                                                                                                                                                                                                                                                                                            |
| Keywords:                       | Public health < INFECTIOUS DISEASES, Epidemiology < INFECTIOUS DISEASES, PUBLIC HEALTH                                                                                                                                                                                                                                                                                                                                                                                                                                                                                                                                                                                                                                                                                                                                                                                                                                                                                                                                                                                                                                                                                                                                                                                                                      |
|                                 |                                                                                                                                                                                                                                                                                                                                                                                                                                                                                                                                                                                                                                                                                                                                                                                                                                                                                                                                                                                                                                                                                                                                                                                                                                                                                                             |

1  
2  
3  
4  
5  
6  
7  
8  
9  
10  
11  
12  
13  
14  
15  
16  
17  
18  
19  
20  
21  
22  
23  
24  
25  
26  
27  
28  
29  
30  
31  
32  
33  
34  
35  
36  
37  
38  
39  
40  
41  
42  
43  
44  
45  
46  
47  
48  
49  
50  
51  
52  
53  
54  
55  
56  
57  
58  
59  
60







I, the Submitting Author has the right to grant and does grant on behalf of all authors of the Work (as defined in the below author licence), an exclusive licence and/or a non-exclusive licence for contributions from authors who are: i) UK Crown employees; ii) where BMJ has agreed a CC-BY licence shall apply, and/or iii) in accordance with the terms applicable for US Federal Government officers or employees acting as part of their official duties; on a worldwide, perpetual, irrevocable, royalty-free basis to BMJ Publishing Group Ltd ("BMJ") its licensees and where the relevant Journal is co-owned by BMJ to the co-owners of the Journal, to publish the Work in this journal and any other BMJ products and to exploit all rights, as set out in our [licence](#).

The Submitting Author accepts and understands that any supply made under these terms is made by BMJ to the Submitting Author unless you are acting as an employee on behalf of your employer or a postgraduate student of an affiliated institution which is paying any applicable article publishing charge ("APC") for Open Access articles. Where the Submitting Author wishes to make the Work available on an Open Access basis (and intends to pay the relevant APC), the terms of reuse of such Open Access shall be governed by a Creative Commons licence – details of these licences and which [Creative Commons](#) licence will apply to this Work are set out in our licence referred to above.

Other than as permitted in any relevant BMJ Author's Self Archiving Policies, I confirm this Work has not been accepted for publication elsewhere, is not being considered for publication elsewhere and does not duplicate material already published. I confirm all authors consent to publication of this Work and authorise the granting of this licence.

1  
2  
3 **Epidemiologic Investigation of the First 5,685 Cases of SARS-CoV-2**  
4  
5  
6 **Infection in Qatar, February 28-April 18, 2020**  
7  
8  
9

10 Hanan M. Al Kuwari, PhD<sup>1</sup>

11 Hanan F. Abdul Rahim, PhD<sup>2</sup>

12 Laith J. Abu Raddad, PhD<sup>3</sup>

13 Abdul-Badi Abou-Samra, MD, PhD<sup>4</sup>

14 Zaina Al Kanaani, MPH, PhD<sup>5</sup>

15 Abdullatif Al Khal, MD<sup>4</sup>

16 Einas Al Kuwari, MD<sup>6</sup>

17 Salih Al Marri, MD<sup>1</sup>

18 Muna Al Masalmani, MD<sup>4</sup>

19 Hamad Eid Al Romaihi, MD<sup>1</sup>

20 Mohamed H. Al Thani, MD, MPH<sup>1</sup>

21 Peter Coyle, MD<sup>6</sup>

22 Ali Nizar Latif, MBBS, MPH<sup>5</sup>

23 Robert Owen, MD<sup>7</sup>

24 **Roberto Bertollini, MD, MPH<sup>1</sup>**

25 **Adeel A. Butt, MBBS, MS<sup>4,8</sup>**  
26  
27  
28  
29  
30  
31  
32  
33  
34  
35  
36  
37  
38  
39  
40  
41  
42  
43  
44  
45  
46

47 Author affiliations:

48 1 Office of the Minister of Public Health, Ministry of Public Health, Doha, Qatar

49 2 College of Health Sciences, QU Health, Qatar University, Doha, Qatar

50 3 Infectious Disease Epidemiology Group, Weill Cornell Medicine-Qatar, Cornell University,

51 Doha, Qatar  
52  
53  
54  
55  
56  
57  
58  
59  
60

1  
2  
3 4 Department of Medicine, Hamad Medical Corporation, Doha, Qatar  
4

5 5 Business Intelligence Unit, Hamad Medical Corporation, Doha, Qatar  
6

7 6 Department of Laboratory Medicine, Hamad Medical Corporation, Doha  
8

9 7 National Ambulance Service, Hamad Medical Corporation, Doha, Qatar  
10

11 8 Department of Medicine, Weill Cornell Medical College, New York, USA and Doha, Qatar  
12  
13

14  
15  
16 Address all correspondence to:

17 Professor Adeel A. Butt

18 Department of Medicine

19 Hamad Medical Corporation

20 PO Box 3050, Doha, Qatar

21 E-mail: aabutt@hamad.qa  
22  
23  
24  
25  
26  
27  
28  
29

Alternate corresponding author:

Professor Roberto Bertollini

Ministry of Public Health

PO Box 42

Doha, Qatar

30 Word count: 3,157;

Abstract word count: 244

31  
32 Tables: 5;

Figures: 2  
33  
34  
35  
36  
37  
38

39 Key words: SARS-CoV-2; COVID-19; Qatar; epidemiology;  
40  
41  
42  
43  
44  
45  
46  
47  
48  
49  
50  
51  
52  
53  
54  
55  
56  
57  
58  
59  
60

## Abstract

### Objective

To define the epidemiologic curve of COVID-19 in Qatar and determine factors associated with severe or critical illness

### Design

Case series of first 5,685 COVID-19 cases in Qatar

### Setting and Participants

All confirmed COVID-19 cases in the State of Qatar between February 28 and April 18, 2020

### Main Outcome Measures

Number of total and daily new COVID-19 infections; demographic characteristics and comorbidity burden and severity of infection; factors associated with severe or critical illness

### Results

Between February 28 and April 18, 2020, 5,685 cases of COVID-19 were identified. Median age was 34 (IQR 28,43) years, 88.9% were male and 8.7% were Qatari nationals. Overall, 83.6% had no concomitant comorbidity, and 3.0% had 3 or more comorbidities. The overwhelming majority (90.9%) were asymptomatic or with minimal symptoms, with 2.0% having severe or critical illness. Seven deaths were observed during the time interval studied. Presence of hypertension or diabetes was associated with a higher risk of severe or critical illness, but age was not. The epidemiologic curve indicated two distinct patterns of infection, a larger cluster among expatriate craft and manual workers, and a smaller one among Qatari nationals returning from abroad during the epidemic.

## Conclusion

COVID-19 infections in Qatar started in two distinct clusters, but then became more widespread in the population through community transmission. Infections were mostly asymptomatic or with minimal symptoms and associated with very low mortality. Severe/critical illness was associated with presence of hypertension or diabetes, but not with increasing age.

### Article Summary

Strengths and limitations of this study:

- National study with unified contact tracing and testing
- All testing done at a single lab, and all tests performed in the State of Qatar during the study period were included, providing a robust national estimate of the number of infected persons among those tested
- Comorbidities were retrieved from the electronic medical records using ICD-10 AM codes
- Exact geographic location and contact tracing data were not included in the current report
- It is possible that some persons still under care on the study end date may have progressed to more severe disease after that date

## Introduction

A cluster of patients with pneumonia of unknown etiology linked to a seafood wholesale market was first reported from Wuhan, China in December 2019.<sup>1-4</sup> A novel coronavirus, SARS-CoV-2 was isolated as the causative organism and the resultant disease was named COVID-19.<sup>1,5</sup> Initially presumed to be transmitted from animals to humans, the virus has since spread quickly across the globe through human-to-human transmission.<sup>6-9</sup> As of August 20, 2020, more than 22 million cases and over 791,000 deaths have been reported globally. Published epidemiologic studies across a number of populations show significant differences in rates and severity of infection and in case fatality rates.<sup>10</sup> At this stage of a novel virus pandemic, analyzing transmission patterns in populations with unique demographic characteristics can add to our understanding of the disease dynamics. While it is difficult to isolate the effects of public health measures such as quarantine, lockdown, and physical distancing, it is nevertheless useful to track the course of the epidemic in relation to the timeline of their implementation for an understanding of the context in which the epidemic unfolded.

Qatar is a part of the six-country Gulf Cooperation Council (GCC), which also includes Saudi Arabia, Kuwait, Oman, Bahrain and the United Arab Emirates. Qatar has a unique population demographic profile. Among the 2.8 million residents of Qatar, expatriate workforce constitutes about 88% of the population.<sup>11</sup> Due to the nature of the expatriate workforce, the majority of the population in Qatar (~75%) are male, and the population pyramid is heavily concentrated in the 20-50 year age groups, particularly among males.<sup>11</sup> There is evidence that COVID-19 disproportionately affects males and outcomes are poorer in the older age group.<sup>3,12,13</sup> Influx or efflux of the population can also affect epidemic dynamics. Such changes in population can be expected in populations with a high proportion of non-national or non-native groups such as GCC countries. There were no travel restrictions in the early part of the study, i.e. from February 28 to March 30, 2020. A general restriction on all incoming flights into Qatar was implemented

1  
2  
3 on March 31, which halted almost all influx of visitors or residents into the country. Exit travel  
4 was not generally restricted. However, two factors diminished outbound travel sharply: 1) global  
5 restrictions on travel leading to a sharp reduction in all flights; 2) restriction of essential workers,  
6 e.g. healthcare workers, from taking leave and travelling except in urgent or emergency  
7 situations. Our main objective was to define the epidemiologic features of COVID-19 in Qatar,  
8 and to determine factors associated with severe or critical illness. Understanding the  
9 epidemiology and risk factors for serious infection in Qatar will be important in understanding  
10 the epidemiology in countries with unique demographic characteristics.  
11  
12  
13  
14  
15  
16  
17  
18  
19  
20  
21

## 22 **Methods**

23  
24 Even before the first case of COVID-19 was identified in the country, Qatar had instituted  
25 extensive plans to identify and manage persons with COVID-19 infection. The existing tracking,  
26 tracing and identification mechanism within the Ministry of Public Health, with proven  
27 effectiveness during the MERS-CoV outbreak, was expanded and put on alert.<sup>14,15</sup> Testing for  
28 suspected cases started on February 5, 2020, and the first case was recorded on February 28,  
29 2020. Using the Ministry of Public Health national database of COVID-19 patients, we  
30 retrospectively identified all confirmed cases of COVID-19 infection between February 28, 2020  
31 and April 18, 2020. All COVID-19 testing in Qatar was performed at the central laboratory of  
32 Hamad Medical Corporation, which is the public healthcare delivery arm for the State of Qatar  
33 and provides over 85% of the inpatient bed capacity in the State. During the study period, there  
34 was targeted, purposeful testing of persons presenting with symptoms of influenza-like illness  
35 suggesting COVID-19. For every person who tested positive, active and aggressive contact  
36 tracing was carried out by trained staff at the Ministry of Public Health. Nasopharyngeal and  
37 throat swabs were collected from suspected cases with symptoms of influenza-like illness  
38 suggesting COVID-19 and, if confirmed, from close contacts. Close contacts were identified  
39 based on the criteria published by the United States Centers for Disease Control and  
40  
41  
42  
43  
44  
45  
46  
47  
48  
49  
50  
51  
52  
53  
54  
55  
56  
57  
58  
59  
60

1  
2  
3 Prevention, which define a close contact as “any individual who was within 6 feet of an infected  
4 person for at least 15 minutes starting from 2 days before illness onset (or, for asymptomatic  
5 patients, 2 days prior to positive specimen collection) until the time the patient is isolated”.<sup>16</sup>  
6  
7

8  
9 Real time RT-PCR was used to detect SARS-CoV-2 infection using TaqPath COVID-19 Combo  
10 Kit (Thermo Fisher Scientific, Waltham, Massachusetts) or Cobas SARS-CoV-2 Test (Roche  
11 Diagnostics, Rotkreuz, Switzerland). These tests are highly sensitive and specific with no cross-  
12 reactivity against multiple other respiratory viruses.<sup>17,18</sup> Nationality of each tested person was  
13 ascertained from the official State Identification Card, which is issued to each national and  
14 expatriate worker and their dependents residing in Qatar. Demographic characteristics and  
15 comorbidities were retrieved from the electronic medical records where they are coded using  
16 the International Classification of Diseases 10<sup>th</sup> edition, Australian Modification. Severity of  
17 illness at the time of presentation was determined by expert coders using criteria suggested by  
18 the World Health Organization, including admission to an acute care or an intensive care bed,  
19 need for mechanical ventilation, oxygen saturation and supplemental oxygen requirement.<sup>19</sup>  
20  
21

22  
23 **(Supplementary table 1)** Severity of illness was categorized into 1) asymptomatic or minimal  
24 symptoms, 2) mild symptoms or uncomplicated upper respiratory tract infection without clinical  
25 or radiographic evidence of pneumonia, 3) mild symptoms with clinical or radiographic evidence  
26 of pneumonia, 4) severely ill, and 5) critically ill.<sup>19</sup>  
27  
28  
29  
30  
31  
32

33  
34  
35 We created a timeline of newly diagnosed cases to study the progression of the epidemic in  
36 Qatar. Key governmental decisions taken by the Supreme Committee for Crisis Management  
37 and the Council of Ministers in response to the epidemic were marked on the timeline to show  
38 their temporal relation to the cases. Multivariable logistic regression was used to determine  
39 factors associated with severe and critical illness. Covariates of interest included in the model  
40 were age, gender, nationality and presence of comorbidities. Comorbidities with a total count of  
41 less than 15 were excluded because of the small numbers.  
42  
43  
44  
45  
46  
47  
48  
49  
50  
51  
52  
53  
54  
55  
56  
57  
58  
59  
60



1  
2  
3  
4  
5 Changes in population movement were assessed using Google mobility reports, a publicly  
6 available tool that tracks movement of people who use mobile applications like Google Maps.<sup>20</sup>  
7  
8 They show changes in visits and length of stay at various locations compared to a baseline.  
9  
10 Baseline was the median value, for the corresponding day of the week, during the 5-week  
11  
12 period between January 3, 2020 and February 6, 2020.<sup>20</sup>  
13  
14  
15

### 16 17 18 *Ethical Approval*

19  
20 The Institutional Review Board at Hamad Medical Corporation approved this study with an  
21 expedited status due to the emergency pandemic status of the COVID-19 outbreak.  
22  
23  
24  
25

### 26 27 *Patient and Public Involvement*

28 This study was conducted in response to a national and global public health emergency. There  
29 was no patient or public involvement. However, key elements of the data are shared with the  
30 public on a daily basis.  
31  
32  
33  
34  
35

### 36 37 **Results**

38  
39 Between February 5, 2020 and April 18, 2020 (11:00 AM local time), 60,645 persons were  
40 tested for SARS-CoV-2, of whom 5,685 were confirmed positive. Before the first case was  
41 diagnosed, testing for SARS-CoV-2 focused on those with influenza-like illness and severe  
42 acute respiratory infection. The first cases were identified among quarantined travelers returning  
43 to Qatar on February 28, 2020, followed by the identification of a large cluster of over 300  
44 infections on March 6, 2020 among expatriate craft and manual workers. Following the  
45 discovery of the first community cluster, testing was expanded to include contacts of new cases,  
46 persons in hotspots, that is areas where infections were diagnosed, individuals with suspected  
47 infection or suggestive symptoms, and travelers coming or returning to Doha. The rapid  
48  
49  
50  
51  
52  
53  
54  
55  
56  
57  
58  
59  
60

1  
2  
3 expansion of testing created a backlog, which was resolved through an investment in testing  
4 infrastructure that significantly increased the testing capacity to approximately 4,000 tests per  
5 day in the early days of the pandemic.  
6  
7  
8  
9

10  
11 The number of new cases diagnosed by date of diagnosis is presented in **figure 1**. The  
12 epidemiologic curve showed two distinct patterns of infection transmission. A larger and  
13 sustained community transmission was observed among expatriate workers, predominantly  
14 among craft and manual workers, which subsequently reached other population segments. A  
15 second smaller cluster among Qatari nationals returning from overseas during the study period  
16 was not sustained over time. Subsequent smaller case clusters among Qatari nationals were  
17 traced to the local community. The number of tests performed per day and the number testing  
18 positive is provided in **supplementary figure 1**. The positivity rate, that is number of tests  
19 positive over total number of tests, is shown in **figure 2**. The positivity rate increased steadily  
20 with time, with somewhat of an accelerated rate after April 5, 2020.  
21  
22  
23  
24  
25  
26  
27  
28  
29  
30  
31  
32  
33  
34

35 The median age (IQR) of the infected persons was 34 (28,43) years and 88.9% were male  
36 **(Table 1)**. Other baseline characteristics are also shown in **table 1**. The nationalities with  
37 highest frequency of infection were Indian (27.4%), Bangladeshi (18.9%), Nepalese (18.4%),  
38 Qatari (8.7%), and Pakistani (6.2%). The most common comorbidities were hypertension  
39 (6.9%), diabetes mellitus (6.0%), cardiovascular disease (4.4%) and chronic lung disease  
40 (3.0%). Comorbidity data were missing for 235 persons (4.1%). Among all infected persons,  
41 4,753 (83.6%) had no known comorbidity and 697 (12.3%) had at least one comorbidity. An  
42 overwhelming majority of infected persons (90.9%) were either asymptomatic or had minimal  
43 symptoms, 0.8% had mild illness without evidence of pneumonia, 2.3% had mild illness with  
44 pneumonia, and 2% were severe or critically ill. Severity of illness data were missing for 223  
45 (3.9%) persons. **(Table 1)** Since age is a critical determinant of outcomes in patients with  
46  
47  
48  
49  
50  
51  
52  
53  
54  
55  
56  
57  
58  
59  
60

1  
2  
3 SARS-CoV-2 infection, we looked at age with multiple different groupings and ranges. Among  
4 those aged 0-10, only 3 out of 121 children had mild upper respiratory symptoms without  
5 evidence of pneumonia; all others were asymptomatic. Among those aged 11-15, none of the  
6  
7 44 children were symptomatic. Among those aged 16-18, 1 had mild upper respiratory  
8  
9 symptoms without evidence of pneumonia and 2 had severe disease. There were no incidence  
10  
11 of critical illness and no deaths in children. These numbers were too low for each of those age  
12  
13 categories to be entered into a regression model, therefore we grouped ages 0-20 years  
14  
15 together.  
16  
17  
18  
19  
20  
21

22 A larger proportion of persons with mild illness with or without pneumonia and those with severe  
23 or critical illness had at least one comorbidity. **(Table 2)** Compared to those with asymptomatic  
24 or minimally symptomatic illness, prevalence of most comorbidities was 3-4 times higher among  
25 those with mild disease with or without pneumonia or severe/critical illness. Severity of illness by  
26 number of comorbidities is shown in **table 3**. Among persons with no comorbidity, 96.1% were  
27 asymptomatic or had minimal symptoms, 2.5% had mild illness with or without pneumonia, and  
28 1.4% were severely or critical ill. Among persons with 2 or more comorbidities, 82.1% were  
29 asymptomatic or had minimal symptoms, 10.9% had mild illness with or without pneumonia, and  
30 7.1% were severely or critical ill. **(Table 3)**  
31  
32  
33  
34  
35  
36  
37  
38  
39  
40  
41  
42

43 Seven deaths were observed during the time interval studied, corresponding to a case-fatality  
44 rate of 1.2 per 1,000 cases. All seven deaths were males aged 40-88 years. All except one (74  
45 years old male) had comorbidities, including diabetes (5 subjects), cardiovascular disease (5  
46 subjects) and hypertension (3 subjects). One patient (58 years old male) had 5 comorbidities  
47 (diabetes, hypertension, cardiovascular disease, chronic kidney and liver disease). In a  
48 multivariable logistic regression model, presence of hypertension (OR 3.49; 95% CI 1.83,6.68)  
49 or diabetes (OR 3.17; 95% CI 1.76,5.71) were associated with a higher risk of severe or critical  
50  
51  
52  
53  
54  
55  
56  
57  
58  
59  
60

1  
2  
3 disease. **(Table 4)** Cardiovascular disease, chronic lung disease, chronic kidney disease and  
4 solid organ malignancy were not associated with a higher risk. We repeated the logistic  
5 regression analysis after excluding those with missing data and the results were nearly identical.  
6  
7

8  
9 **(Supplementary table 2)** We also repeated the analysis using number of comorbidities as  
10 covariates. Presence of any single comorbidity (OR 5.43, 95% CI 3.41,8.63) or any 3 or more  
11 comorbidities (OR 6.16, 95% CI 3.35,11.32) were associated with a higher risk of severe or  
12 critical illness. **(Supplementary table 3)**  
13  
14  
15

16  
17  
18  
19  
20 In a subsequent report in which the first 5,000 patients with COVID-19 infection in Qatar were  
21 followed for up to 60 days after diagnosis, a total of 1,424 patients (28.5%) required  
22 hospitalization, out of which 108 (7.6%) were admitted to an intensive care unit (ICU), 14  
23 patients (0.28%) had died, 10 (0.2%) were still in hospital, and two (0.04%) were still in ICU.<sup>21</sup>  
24  
25  
26  
27  
28  
29

30  
31 Google mobility reports data demonstrated a significant decrease in number of people visiting  
32 retail and recreation outlets, grocery and pharmacy stores, parks, transit stations and  
33 workplaces over time. **(Table 5)** A concurrent increase in people staying in residential areas  
34 was observed over this timeframe. A snapshot on April 17 showed a 69% reduction in visits to  
35 retail and recreation areas, a 44% reduction in visits to grocery and pharmacy stores, a 64%  
36 decrease in visits to parks, a 68% decrease in visits to transit stations and a 38% decrease in  
37 visits to workplaces. A 21% increase in people in residential areas was observed on this date.  
38  
39  
40  
41  
42  
43  
44  
45  
46  
47  
48

## 49 **Discussion**

50  
51 We provide a characterization of the SARS-CoV-2 outbreak in Qatar, which offers new insights  
52 into the behavior of the pandemic in a unique demographic setting.  
53  
54  
55  
56  
57  
58  
59  
60

1  
2  
3 The first case in Qatar was identified on February 28, 2020, among returning travelers, which is  
4 nearly 9 weeks after the first cluster was reported from Wuhan, China.<sup>22</sup> During this time,  
5 infection had spread to multiple countries over four continents. This was also a critical time  
6 during which the State of Qatar formulated a national plan to respond to the anticipated cases.  
7  
8 Testing for SARS-CoV-2 started in Qatar on February 5, 2020 and the first major cluster of  
9 cases was identified on March 8, 2020 where over 300 cases were linked to 4 expatriate  
10 workers through aggressive contact tracing. Such aggressive identification and contact tracing  
11 and testing were probably the reasons for a small number of daily new cases till March 31,  
12 2020. At that time, a large number of returning travelers and nationals were identified to have  
13 infection. The number of daily diagnosed infections accelerated in April, in part due to a large  
14 increase in number of daily tests, but also reflecting expansion of the epidemic in the wider  
15 population. This trend occurred predominantly in expatriate workers often living in more  
16 crowded areas and accommodations with frequent social mixing despite a national campaign to  
17 discourage peoples' movement except in urgent situations. The epidemic, however, eventually  
18 reached a larger population.  
19  
20  
21  
22  
23  
24  
25  
26  
27  
28  
29  
30  
31  
32  
33  
34  
35  
36

37 An overwhelming majority (>90%) of confirmed COVID-19 cases were asymptomatic or had  
38 minimal symptoms not requiring urgent medical care or hospitalization. This is likely due to the  
39 younger age of the population (median age 34 years) and overall absence of any comorbidities  
40 in the vast majority of the infected persons. This reinforces our current understanding of the  
41 disease being mild or asymptomatic in a majority of the persons, particularly among the younger  
42 and healthier persons, as well as the strong role of age in the epidemiology of this infection.  
43  
44 Similar to other studies, presence of comorbidities was associated with severe or critical  
45 disease.<sup>1</sup> We found a very low mortality among confirmed COVID-19 patients in Qatar, which  
46 may at least partly be attributable both to the timely and effective response of the health system  
47 and the demographic characteristics of the infected persons. It is conceivable that right  
48  
49  
50  
51  
52  
53  
54  
55  
56  
57  
58  
59  
60

1  
2  
3 censoring with the time delay between onset of disease to death may play a part, though  
4  
5 similarly very low mortality after the study period ended does not support this. The role that  
6  
7 factors such as free access to high quality medical care for everyone residing in Qatar,  
8  
9 availability of a high number of critical care beds, or differences in viral subtypes, played, needs  
10  
11 further study.  
12  
13  
14  
15

16 In response to the spread of COVID-19, the country took a series of public health measures,  
17  
18 including limiting incoming passenger flights into Doha through Hamad International Airport and  
19  
20 providing free state quarantine facilities for returning travelers. A host of other measures were  
21  
22 implemented gradually that promoted physical distancing, including closing retail stores in malls  
23  
24 and shopping centers, closing entertainment and dining facilities, postponing or canceling large  
25  
26 sports events and conferences, suspending classes in schools and universities, and mandating  
27  
28 working from home for 80% of workers in the public and private sectors. The healthcare system  
29  
30 was also reorganized to prioritize COVID-19 response over routine services. All positive cases  
31  
32 including those without symptoms were admitted to isolation facilities managed by the public  
33  
34 healthcare system. These public health measures were heavily promoted and widely  
35  
36 communicated through social and traditional media outlets to all segments of society. Mobility  
37  
38 data shows a significant reduction in visits to common retail, recreation, transit and workplace  
39  
40 areas, which may have contributed to a reduction in spread of infection. There was a more  
41  
42 pronounced reduction in mobility in the weeks following April 5th, which coincides with the  
43  
44 significant rise in the reported number of positive cases.  
45  
46  
47  
48  
49

50 The pandemic has affected nearly every country and territory in the world. However, infection  
51  
52 rates and case fatality rates vary widely among countries. For example, crude case fatality rate  
53  
54 is 3.2% in the US, 7.5% in Canada, 15% in the UK, but only 0.16% in Qatar and 0.67% in  
55  
56 Kuwait (as of August 10, 2020).<sup>23</sup> It has been postulated that the population demographics and  
57  
58  
59

1  
2  
3 comorbidity burden are the key determinants of the variability in case fatality rates. However,  
4 these differences alone are unlikely to fully account for the widely variable case fatality rates.  
5  
6 Testing per capita, seroprevalence among the general population, availability of acute and  
7  
8 intensive care beds, living arrangements of infected persons and access to promising  
9  
10 therapeutic options may provide additional explanations for the difference.  
11  
12  
13  
14  
15

16 Strengths of our study include unified contact tracing and testing, with all testing done at a  
17  
18 single lab. All tests performed in the State of Qatar were included, providing a robust national  
19  
20 estimate of the number of infected persons among those tested. There are limitations to our  
21  
22 study. Comorbidities were retrieved from the electronic medical records using ICD-10 AM  
23  
24 codes. Exact geographic location and contact tracing data were not included in the current  
25  
26 report. Our study end date was April 18, 2020, and all persons with confirmed infection till that  
27  
28 date were included. However, it is possible that some persons may have progressed to more  
29  
30 severe disease after this date. Some of these data are the subject of another report with a brief  
31  
32 summary provided in the preceding paragraph. Finally, the testing for COVID-19 during the  
33  
34 study period was not population based which may affect the true infection rates and outcomes.  
35  
36  
37  
38

39 In conclusion, we describe the evolution of COVID-19 epidemic in the State of Qatar. For the  
40  
41 population tested, the epidemic predominantly affected males and younger population and was  
42  
43 associated with no or minimal symptoms in a vast majority of the infected persons. Presence of  
44  
45 hypertension and diabetes were associated, but increasing age was not associated with a  
46  
47 higher risk of severe or critical illness. Public health measures were instituted early and may  
48  
49 have led to the slower growth compared with other countries which delayed such measures.  
50  
51  
52  
53  
54  
55  
56  
57  
58  
59  
60

Table 1. Characteristics of 5,685 patients with confirmed COVID-19 infection in Qatar between February 29 and April 18, 2020.

| Variable                | N (%)         |
|-------------------------|---------------|
| <b>Demographics</b>     |               |
| Mean age, years (SD)    | 35.8 (12.0)   |
| Median age, years (IQR) | 34 (28,43)    |
| 0-20 years              | 302 (5.3%)    |
| 21-40 years             | 3,666 (64.5%) |
| 41-60 years             | 1,537 (27.0%) |
| >60 years               | 180 (3.2%)    |
| Male sex                | 5,052 (88.9%) |
| <b>Nationality</b>      |               |
| Indian                  | 1,559 (27.4%) |
| Bangladeshi             | 1,077 (18.9%) |
| Nepalese                | 1,047 (18.4%) |
| Qatari                  | 497 (8.7%)    |
| Pakistani               | 353 (6.2%)    |
| Filipino                | 185 (3.3%)    |
| Egyptian                | 179 (3.1%)    |
| Sri Lankan              | 109 (1.9%)    |
| Sudanese                | 91 (1.6%)     |
| Others                  | 588 (10.3%)   |
| <b>Comorbidities</b>    |               |
| Hypertension            | 391 (6.9%)    |
| Diabetes mellitus       | 344 (6.0%)    |



|                                       |               |
|---------------------------------------|---------------|
| Cardiovascular disease                | 250 (4.4%)    |
| Chronic lung disease                  | 169 (3.0%)    |
| Chronic kidney disease                | 35 (0.6%)     |
| Solid organ malignancy                | 30 (0.5%)     |
| Tuberculosis                          | 13 (0.2%)     |
| Chronic liver disease                 | 12 (0.2%)     |
| Autoimmune disease                    | 6 (0.1%)      |
| Missing                               | 235 (4.1%)    |
| Number of comorbidities (235 missing) |               |
| 0                                     | 4,753 (83.6%) |
| 1                                     | 384 (6.8%)    |
| 2                                     | 139 (2.5%)    |
| 3                                     | 121 (2.1%)    |
| ≥4                                    | 53 (0.9%)     |
| Missing                               | 235 (4.1%)    |
| Severity of illness                   |               |
| Asymptomatic or minimal symptoms      | 5,168 (90.9%) |
| Mild illness without pneumonia        | 44 (0.8%)     |
| Mild illness with pneumonia           | 133 (2.3%)    |
| Severe illness                        | 82 (1.4%)     |
| Critical illness                      | 35 (0.6%)     |
| Missing                               | 223 (3.9%)    |

Table 2. Prevalence of comorbidities by severity of illness.

|                        | <b>Asymptomatic or minimally symptomatic</b> | <b>Mild illness with or without pneumonia</b> | <b>Severe/critical illness</b> |
|------------------------|----------------------------------------------|-----------------------------------------------|--------------------------------|
|                        | <b>N (%)</b>                                 | <b>N (%)</b>                                  | <b>N (%)</b>                   |
| Hypertension           | 317 (6.1)                                    | 41 (23.2)                                     | 31 (26.5)                      |
| Diabetes mellitus      | 281 (5.4)                                    | 33 (18.6)                                     | 30 (25.6)                      |
| Cardiovascular disease | 199 (3.8)                                    | 31 (17.5)                                     | 19 (16.2)                      |
| Chronic lung disease   | 145 (2.8)                                    | 12 (6.8)                                      | 10 (8.6)                       |
| Chronic kidney disease | 25 (0.5)                                     | 6 (3.4)                                       | 4 (3.4)                        |
| Solid organ malignancy | 26 (0.5)                                     | 2 (1.1)                                       | 2 (1.7)                        |
| Tuberculosis           | 10 (0.2)                                     | 2 (1.1)                                       | 1 (0.8)                        |
| Chronic liver disease  | 10 (0.2)                                     | 2 (1.1)                                       | 0 (0)                          |
| Autoimmune disease     | 5 (0.1)                                      | 1 (0.6)                                       | 0 (0)                          |

Table 3. Severity of illness by number of comorbidities

| <b>Number of comorbidities</b> | <b>Asymptomatic or minimal symptoms, N (%)</b> | <b>Mild illness with or without pneumonia, N (%)</b> | <b>Severe/critical illness, N (%)</b> |
|--------------------------------|------------------------------------------------|------------------------------------------------------|---------------------------------------|
| No comorbidity                 | 4,582 (96.1%)                                  | 120 (2.5%)                                           | 67 (1.4%)                             |
| Only 1 comorbidity             | 330 (86.6%)                                    | 23 (6.0%)                                            | 28 (7.3%)                             |
| 2 or more comorbidities        | 256 (82.1%)                                    | 34 (10.9%)                                           | 22 (7.1%)                             |

Table 4. Factors associated with severe or critical illness (multivariable logistic regression model).

| Variables                           | Odds Ratio | [95% Conf. Interval] |      | P-value |
|-------------------------------------|------------|----------------------|------|---------|
| Age                                 |            |                      |      |         |
| 0-20 years (reference)              | reference  |                      |      |         |
| 21-40 years                         | 1.51       | 0.46                 | 4.93 | 0.62    |
| 41-60 years                         | 1.57       | 0.45                 | 5.46 | 0.55    |
| 60+ years                           | 1.39       | 0.3                  | 6.49 | 0.94    |
| Male gender                         | 0.98       | 0.53                 | 1.83 | 0.95    |
| Qatari nationality (vs. non-Qatari) | 0.83       | 0.43                 | 1.6  | 0.58    |
| Hypertension                        | 3.49       | 1.83                 | 6.68 | 0.0002  |
| Diabetes mellitus                   | 3.17       | 1.76                 | 5.71 | 0.0001  |
| Cardiovascular disease              | 0.54       | 0.24                 | 1.22 | 0.14    |
| Chronic lung disease                | 1.64       | 0.79                 | 3.42 | 0.19    |
| Chronic kidney disease              | 1.31       | 0.41                 | 4.21 | 0.65    |
| Cancer                              | 1.26       | 0.28                 | 5.66 | 0.77    |

Table 5. Relative change in people visiting areas of common interest in the State of Qatar.

(Comparison period January 3, 2020 – February 6, 2020)

|                     | Qatar March 29 | Qatar April 5 | Qatar April 11 | Qatar April 17 |
|---------------------|----------------|---------------|----------------|----------------|
| Retail & Recreation | -51%           | -50%          | -63%           | -69%           |
| Grocery & Pharmacy  | -25%           | -21%          | -35%           | -44%           |
| Parks               | -34%           | -35%          | -48%           | -64%           |
| Transit stations    | -52%           | -52%          | -60%           | -68%           |
| Workplaces          | -31%           | -36%          | -39%           | -38%           |
| Residential         | +22%           | +24%          | +23%           | +21%           |

1  
2  
3  
4  
5  
6  
7  
8  
9  
10  
11  
12  
13  
14  
15  
16  
17  
18  
19  
20  
21  
22  
23  
24  
25  
26  
27  
28  
29  
30  
31  
32  
33  
34  
35  
36  
37  
38  
39  
40  
41  
42  
43  
44  
45  
46  
47

Figure 1. Epidemiologic curve of patients with COVID-19 in Qatar.

For peer review only

1  
2  
3 Figure 2. Positivity rate among those tested for SARS-CoV-2 active infection by swab day.  
4  
5  
6  
7  
8  
9  
10  
11  
12  
13  
14  
15  
16  
17  
18  
19  
20  
21  
22  
23  
24  
25  
26  
27  
28  
29  
30  
31  
32  
33  
34  
35  
36  
37  
38  
39  
40  
41  
42  
43  
44  
45  
46  
47

For peer review only

**Contributorship Statement:**

Drafting of the manuscript: HMAK; HFAR; LJAR; RB; AAB;

Data acquisition: AAB; AAK; MHAT; ANL; ZAK; SAM; HEA; RO; MAM; ABAS;

Laboratory testing and reporting: EAK; PC;

Study design: HMAK; HFAR; LJAR; RB; AAB;

Data analysis: AAB;

Data interpretation: HMAK; AAB; HFAR; LJAR; RB;

Critical appraisal and review: All authors

**Competing interests:**

None of the authors have any financial conflict of interest related to this article.

H.E. Dr. Hanan. M. Al Kuwari is the Minister of Public Health for the State of Qatar.

**Funding**

None

**Data Sharing Statement**

No additional data are available

**Ethical Approval**

This study was approved by the Institutional Review Board at Hamad Medical Corporation.

(MRC-05-011)

**Patient Consent**

A waiver of informed consent was granted.



1  
2  
3  
4  
5 **Patient of Public Involvement**  
6

7 There was not patient or public involvement in the design, conduct or reporting of this study.  
8  
9

10  
11 **Transparency declaration**  
12

13 The lead author (the manuscript's guarantor) affirms that the manuscript is an honest, accurate,  
14 and transparent account of the study being reported; that no important aspects of the study  
15 have been omitted; and that any discrepancies from the study as planned (and, if relevant,  
16 registered) have been explained.  
17  
18  
19  
20  
21  
22  
23

24 **Dissemination declaration**  
25

26 Dissemination to study participants or patient organizations is not possible/applicable.  
27  
28  
29  
30  
31  
32  
33  
34  
35  
36  
37  
38  
39  
40  
41  
42  
43  
44  
45  
46  
47  
48  
49  
50  
51  
52  
53  
54  
55  
56  
57  
58  
59  
60

## References

1. Zhu N, Zhang D, Wang W, et al. A Novel Coronavirus from Patients with Pneumonia in China, 2019. *N Engl J Med* 2020;382:727-33.
2. Chen N, Zhou M, Dong X, et al. Epidemiological and clinical characteristics of 99 cases of 2019 novel coronavirus pneumonia in Wuhan, China: a descriptive study. *Lancet* 2020;395:507-13.
3. Huang C, Wang Y, Li X, et al. Clinical features of patients infected with 2019 novel coronavirus in Wuhan, China. *Lancet* 2020;395:497-506.
4. Wang D, Hu B, Hu C, et al. Clinical Characteristics of 138 Hospitalized Patients With 2019 Novel Coronavirus-Infected Pneumonia in Wuhan, China. *JAMA* 2020.
5. Lu R, Zhao X, Li J, et al. Genomic characterisation and epidemiology of 2019 novel coronavirus: implications for virus origins and receptor binding. *Lancet* 2020;395:565-74.
6. Phan LT, Nguyen TV, Luong QC, et al. Importation and Human-to-Human Transmission of a Novel Coronavirus in Vietnam. *N Engl J Med* 2020;382:872-4.
7. Young BE, Ong SWX, Kalimuddin S, et al. Epidemiologic Features and Clinical Course of Patients Infected With SARS-CoV-2 in Singapore. *JAMA* 2020.
8. Holshue ML, DeBolt C, Lindquist S, et al. First Case of 2019 Novel Coronavirus in the United States. *N Engl J Med* 2020;382:929-36.
9. Lescure FX, Bouadma L, Nguyen D, et al. Clinical and virological data of the first cases of COVID-19 in Europe: a case series. *Lancet Infect Dis* doi 101016/S1473-3099(20)30200-0 2020.
10. Oksanen A, Kaakinen M, Latikka R, Savolainen I, Savela N, Koivula A. Regulation and Trust: 3-Month Follow-up Study on COVID-19 Mortality in 25 European Countries. *JMIR Public Health Surveill* 2020;6:e19218.
11. <https://worldpopulationreview.com/countries/qatar-population/> Accessed 21 April 2020. 2020.
12. Wu C, Chen X, Cai Y, et al. Risk Factors Associated With Acute Respiratory Distress Syndrome and Death in Patients With Coronavirus Disease 2019 Pneumonia in Wuhan, China. *JAMA internal medicine* 2020.
13. Zhou F, Yu T, Du R, et al. Clinical course and risk factors for mortality of adult inpatients with COVID-19 in Wuhan, China: a retrospective cohort study. *Lancet* 2020;395:1054-62.
14. Nour M, Alhajri M, Farag E, et al. How Do the First Days Count? A Case Study of Qatar Experience in Emergency Risk Communication during the MERS-CoV Outbreak. *Int J Environ Res Public Health* 2017;14.
15. Farag E, Nour M, Islam MM, et al. Qatar experience on One Health approach for middle-east respiratory syndrome coronavirus, 2012-2017: A viewpoint. *One Health* 2019;7:100090.
16. CDC. Contact tracing for COVID-19. <https://www.cdc.gov/coronavirus/2019-ncov/php/contact-tracing/contact-tracing-plan/contact-tracing.html> accessed August 18, 2020 2020.
17. ThermoFisher. TaqPath COVID-19 Combo Kit: Instructions for Use: [https://assets.thermofisher.com/TFS-Assets/LSG/manuals/MAN0019372\\_TaqPathCOVID-19\\_Kit\\_Australia\\_NZ\\_IFU.pdf](https://assets.thermofisher.com/TFS-Assets/LSG/manuals/MAN0019372_TaqPathCOVID-19_Kit_Australia_NZ_IFU.pdf) accessed August 18, 2020.
18. Roche. cobas® SARS-CoV-2 Test. <https://diagnostics.roche.com/us/en/products/params/cobas-sars-cov-2-test.html> Accessed August 18, 2020.
19. WHO. Clinical management of severe acute respiratory infection when COVID-19 disease is suspected. file:///C:/Users/aabutt/Downloads/WHO-2019-nCoV-clinical-20204-engpdf Accessed 24 April 2020 2020.
20. GOOGLE. <https://www.google.com/covid19/mobility/> Accessed 25 April 2020. 2020.

- 1
- 2
- 3 21. Omrani AS, Almaslamani MA, Daghfal J, et al. The First Consecutive 5000 Patients with
- 4 Coronavirus Disease 2019 from Qatar; a Nation-wide Cohort Study. medRxiv
- 5 2020:2020.07.15.20154690.
- 6 22. WHO. <https://www.who.int/news-room/detail/08-04-2020-who-timeline---covid-19>
- 7 accessed 21 April 2020.
- 8 23. Worldometer. Coronavirus updates.
- 9 [https://www.worldometers.info/coronavirus/?utm\\_campaign=homeAdTOA?](https://www.worldometers.info/coronavirus/?utm_campaign=homeAdTOA?) Accessed August
- 10 10, 2020.
- 11
- 12
- 13
- 14
- 15
- 16
- 17
- 18
- 19
- 20
- 21
- 22
- 23
- 24
- 25
- 26
- 27
- 28
- 29
- 30
- 31
- 32
- 33
- 34
- 35
- 36
- 37
- 38
- 39
- 40
- 41
- 42
- 43
- 44
- 45
- 46
- 47
- 48
- 49
- 50
- 51
- 52
- 53
- 54
- 55
- 56
- 57
- 58
- 59
- 60

1  
2  
3  
4  
5  
6  
7  
8  
9  
10  
11  
12  
13  
14  
15  
16  
17  
18  
19  
20  
21  
22  
23  
24  
25  
26  
27  
28  
29  
30  
31  
32  
33  
34  
35  
36  
37  
38  
39  
40  
41  
42  
43  
44  
45  
46  
47  
48  
49  
50  
51  
52  
53  
54  
55  
56  
57  
58  
59  
60

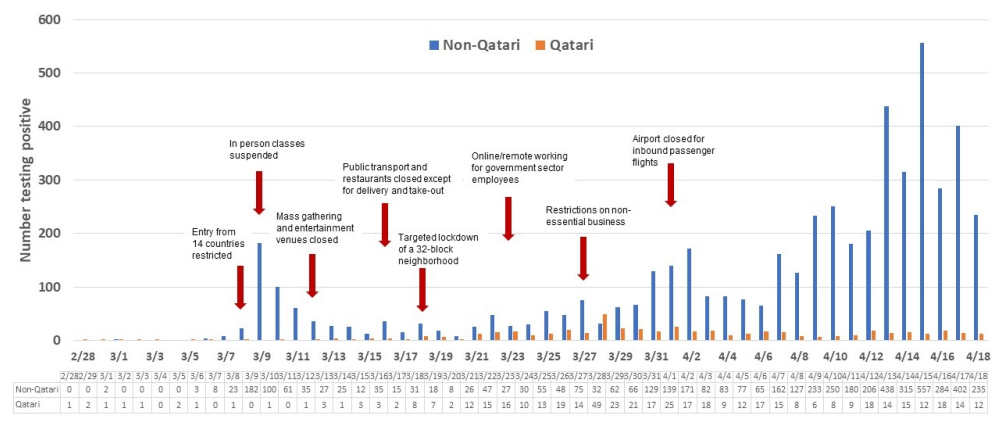

Figure 1

54x30mm (600 x 600 DPI)

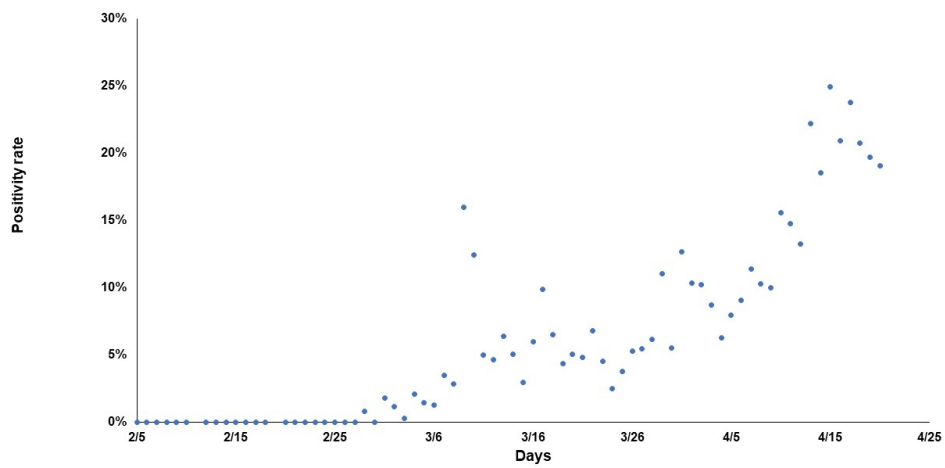

Figure 2

54x30mm (600 x 600 DPI)

1  
2  
3  
4  
5  
6  
7  
8  
9  
10  
11  
12  
13  
14  
15  
16  
17  
18  
19  
20  
21  
22  
23  
24  
25  
26  
27  
28  
29  
30  
31  
32  
33  
34  
35  
36  
37  
38  
39  
40  
41  
42  
43  
44  
45  
46  
47

Supplementary figure. Number of tests done and number of persons who tested positive per day.



Supplementary table. World Health Organization definitions of severity of illness in persons with COVID-19 infection.

| Category |                                     | Definition                                                                                                                                                                                                                                                                                                                                                                                                                                                                                                                                                                                                                                                                                                                                                                                                                                                                                                                                                                                                                                                                                                                                                                                                                                                          |
|----------|-------------------------------------|---------------------------------------------------------------------------------------------------------------------------------------------------------------------------------------------------------------------------------------------------------------------------------------------------------------------------------------------------------------------------------------------------------------------------------------------------------------------------------------------------------------------------------------------------------------------------------------------------------------------------------------------------------------------------------------------------------------------------------------------------------------------------------------------------------------------------------------------------------------------------------------------------------------------------------------------------------------------------------------------------------------------------------------------------------------------------------------------------------------------------------------------------------------------------------------------------------------------------------------------------------------------|
| Mild     |                                     | <p>Patients with uncomplicated upper respiratory tract viral infection, may have non-specific symptoms such as fever, fatigue, cough (with or without sputum production), anorexia, malaise, muscle pain, sore throat, dyspnea, nasal congestion, or headache. Rarely, patients may also present with diarrhoea, nausea and vomiting.</p> <p>The elderly and immunosuppressed may present with atypical symptoms. Symptoms due to physiologic adaptations of pregnancy or adverse pregnancy events, such as e.g. dyspnea, fever, GI-symptoms or fatigue, may overlap with COVID-19 symptoms.</p>                                                                                                                                                                                                                                                                                                                                                                                                                                                                                                                                                                                                                                                                    |
|          | Pneumonia                           | <p>Adult with pneumonia but no signs of severe pneumonia and no need for supplemental oxygen.</p> <p>Child with non-severe pneumonia who has cough or difficulty breathing + fast breathing: fast breathing (in breaths/min): &lt; 2 months: <math>\geq 60</math>; 2–11 months: <math>\geq 50</math>; 1–5 years: <math>\geq 40</math>, and no signs of severe pneumonia.</p>                                                                                                                                                                                                                                                                                                                                                                                                                                                                                                                                                                                                                                                                                                                                                                                                                                                                                        |
| Severe   | Severe pneumonia                    | <p>Adolescent or adult: fever or suspected respiratory infection, plus one of: respiratory rate &gt; 30 breaths/min; severe respiratory distress; or SpO<sub>2</sub> <math>\leq 93\%</math> on room air.</p> <p>Child with cough or difficulty in breathing, plus at least one of the following: central cyanosis or SpO<sub>2</sub> &lt; 90%; severe respiratory distress (e.g. grunting, very severe chest indrawing); signs of pneumonia with a general danger sign: inability to breastfeed or drink, lethargy or unconsciousness, or convulsions. Other signs of pneumonia may be present: chest indrawing, fast breathing (in breaths/min): &lt; 2 months: <math>\geq 60</math>; 2–11 months: <math>\geq 50</math>; 1–5 years: <math>\geq 40</math>. While the diagnosis is made on clinical grounds; chest imaging may identify or exclude some pulmonary complications.</p>                                                                                                                                                                                                                                                                                                                                                                                 |
| Critical | Acute respiratory distress syndrome | <p>Onset: within 1 week of a known clinical insult or new or worsening respiratory symptoms.</p> <p>Chest imaging (radiograph, CT scan, or lung ultrasound): bilateral opacities, not fully explained by volume overload, lobar or lung collapse, or nodules.</p> <p>Origin of pulmonary infiltrates: respiratory failure not fully explained by cardiac failure or fluid overload.</p> <p>Need objective assessment (e.g. echocardiography) to exclude hydrostatic cause of infiltrates/oedema if no risk factor present.</p> <p>Oxygenation impairment in adults:</p> <p>Mild ARDS: <math>200 \text{ mmHg} &lt; \text{PaO}_2/\text{FiO}_2 \leq 300 \text{ mmHg}</math> (with PEEP or CPAP <math>\geq 5 \text{ cmH}_2\text{O}</math>, or non-ventilated)</p> <p>Moderate ARDS: <math>100 \text{ mmHg} &lt; \text{PaO}_2/\text{FiO}_2 \leq 200 \text{ mmHg}</math> (with PEEP <math>\geq 5 \text{ cmH}_2\text{O}</math>, or non-ventilated)</p> <p>Severe ARDS: <math>\text{PaO}_2/\text{FiO}_2 \leq 100 \text{ mmHg}</math> (with PEEP <math>\geq 5 \text{ cmH}_2\text{O}</math>, or non-ventilated)</p> <p>When PaO<sub>2</sub> is not available, SpO<sub>2</sub>/FiO<sub>2</sub> <math>\leq 315</math> suggests ARDS (including in non-ventilated patients).</p> |

1  
2  
3  
4  
5  
6  
7  
8  
9  
10  
11  
12  
13  
14  
15  
16  
17  
18  
19  
20  
21  
22  
23  
24  
25  
26  
27  
28  
29  
30  
31  
32  
33  
34  
35  
36  
37  
38  
39  
40  
41  
42  
43  
44  
45  
46  
47

|  |              |                                                                                                                                                                                                                                                                                                                                                                                                                                                                                                                                                                                                                                                                  |
|--|--------------|------------------------------------------------------------------------------------------------------------------------------------------------------------------------------------------------------------------------------------------------------------------------------------------------------------------------------------------------------------------------------------------------------------------------------------------------------------------------------------------------------------------------------------------------------------------------------------------------------------------------------------------------------------------|
|  |              | <p>Oxygenation impairment in children: note OI = Oxygenation Index and OSI = Oxygenation Index using SpO2. Use PaO2-based metric when available. If PaO2 not available, wean FiO2 to maintain SpO2 ≤ 97% to calculate OSI or SpO2/FiO2 ratio:</p> <p>Bilevel (NIV or CPAP) ≥ 5 cmH2O via full face mask: PaO2/FiO2 ≤ 300 mmHg or SpO2/FiO2 ≤ 264</p> <p>Mild ARDS (invasively ventilated): 4 ≤ OI &lt; 8 or 5 ≤ OSI &lt; 7.5</p> <p>Moderate ARDS (invasively ventilated): 8 ≤ OI &lt; 16 or 7.5 ≤ OSI &lt; 12.3</p> <p>Severe ARDS (invasively ventilated): OI ≥ 16 or OSI ≥ 12.3.</p>                                                                          |
|  | Sepsis       | <p>Adults: life-threatening organ dysfunction caused by a dysregulated host response to suspected or proven infection.<sup>1</sup> Signs of organ dysfunction include: altered mental status, difficult or fast breathing, low oxygen saturation, reduced urine output, fast heart rate, weak pulse, cold extremities or low blood pressure, skin mottling, or laboratory evidence of coagulopathy, thrombocytopenia, acidosis, high lactate or hyperbilirubinemia.</p> <p>Children: suspected or proven infection and ≥ 2 aged based systemic inflammatory response syndrome criteria, of which one must be abnormal temperature or white blood cell count.</p> |
|  | Septic shock | <p>Adults: persisting hypotension despite volume resuscitation, requiring vasopressors to maintain MAP ≥ 65 mmHg and serum lactate level &gt; 2 mmol/L.</p> <p>Children: any hypotension (SBP &lt; 5th centile or &gt; 2 SD below normal for age) or two or three of the following: altered mental state; tachycardia or bradycardia (HR &lt; 90 bpm or &gt; 160 bpm in infants and HR &lt; 70 bpm or &gt; 150 bpm in children); prolonged capillary refill (&gt; 2 sec) or feeble pulse; tachypnea; mottled or cool skin or petechial or purpuric rash; increased lactate; oliguria; hyperthermia or hypothermia.</p>                                           |

For peer review only



Supplementary table 2. Factors associated with severe or critical illness after excluding those with missing severity of illness data (multivariable logistic regression model).

| Variables                           | Odds Ratio | [95% Conf. Interval] |      | P-value |
|-------------------------------------|------------|----------------------|------|---------|
| Age                                 |            |                      |      |         |
| 0-20 years (reference)              | reference  |                      |      |         |
| 21-40 years                         | 1.51       | 0.46                 | 4.93 | 0.62    |
| 41-60 years                         | 1.57       | 0.45                 | 5.43 | 0.55    |
| 60+ years                           | 1.40       | 0.30                 | 6.55 | 0.94    |
| Male gender                         | 0.98       | 0.53                 | 1.83 | 0.95    |
| Qatari nationality (vs. non-Qatari) | 0.83       | 0.43                 | 1.60 | 0.58    |
| Hypertension                        | 3.48       | 1.82                 | 6.66 | 0.0002  |
| Diabetes mellitus                   | 3.14       | 1.74                 | 5.65 | 0.0001  |
| Cardiovascular disease              | 0.55       | 0.24                 | 1.22 | 0.14    |
| Chronic lung disease                | 1.65       | 0.79                 | 3.43 | 0.19    |
| Chronic kidney disease              | 1.31       | 0.41                 | 4.21 | 0.65    |
| Cancer                              | 1.25       | 0.28                 | 5.65 | 0.77    |

Supplementary table 3. Factors associated with severe or critical illness by number of comorbidities (multivariable logistic regression model).

| Variables                           | Odds Ratio | [95% Conf. Interval] |       | P-value |
|-------------------------------------|------------|----------------------|-------|---------|
| Age                                 |            |                      |       |         |
| 0-20 years (reference)              |            |                      |       |         |
| 21-40 years                         | 1.42       | 0.43                 | 4.67  | 0.75    |
| 41-60 years                         | 1.49       | 0.43                 | 5.19  | 0.65    |
| 60+ years                           | 1.44       | 0.31                 | 6.66  | 0.84    |
| Male gender                         | 0.96       | 0.51                 | 1.78  | 0.89    |
| Qatari nationality (vs. non-Qatari) | 0.83       | 0.43                 | 1.58  | 0.57    |
| Number of comorbidities             |            |                      |       |         |
| 0 (reference)                       |            |                      |       |         |
| Any 1                               | 5.43       | 3.41                 | 8.63  | 0.01    |
| 3 or more                           | 6.16       | 3.35                 | 11.32 | 0.01    |

## STROBE Statement—checklist of items that should be included in reports of observational studies

|                              | Item No | Recommendation                                                                                                                                                                                                                                                                                                                                                                                                                                                         |       |
|------------------------------|---------|------------------------------------------------------------------------------------------------------------------------------------------------------------------------------------------------------------------------------------------------------------------------------------------------------------------------------------------------------------------------------------------------------------------------------------------------------------------------|-------|
| <b>Title and abstract</b>    | 1       | (a) Indicate the study's design with a commonly used term in the title or the abstract                                                                                                                                                                                                                                                                                                                                                                                 | 1     |
|                              |         | (b) Provide in the abstract an informative and balanced summary of what was done and what was found                                                                                                                                                                                                                                                                                                                                                                    | 3     |
| <b>Introduction</b>          |         |                                                                                                                                                                                                                                                                                                                                                                                                                                                                        |       |
| Background/rationale         | 2       | Explain the scientific background and rationale for the investigation being reported                                                                                                                                                                                                                                                                                                                                                                                   | 5     |
| Objectives                   | 3       | State specific objectives, including any prespecified hypotheses                                                                                                                                                                                                                                                                                                                                                                                                       | 5 & 6 |
| <b>Methods</b>               |         |                                                                                                                                                                                                                                                                                                                                                                                                                                                                        |       |
| Study design                 | 4       | Present key elements of study design early in the paper                                                                                                                                                                                                                                                                                                                                                                                                                | 6-8   |
| Setting                      | 5       | Describe the setting, locations, and relevant dates, including periods of recruitment, exposure, follow-up, and data collection                                                                                                                                                                                                                                                                                                                                        | 6-8   |
| Participants                 | 6       | (a) <i>Cohort study</i> —Give the eligibility criteria, and the sources and methods of selection of participants. Describe methods of follow-up<br><i>Case-control study</i> —Give the eligibility criteria, and the sources and methods of case ascertainment and control selection. Give the rationale for the choice of cases and controls<br><i>Cross-sectional study</i> —Give the eligibility criteria, and the sources and methods of selection of participants | 6-8   |
|                              |         | (b) <i>Cohort study</i> —For matched studies, give matching criteria and number of exposed and unexposed<br><i>Case-control study</i> —For matched studies, give matching criteria and the number of controls per case                                                                                                                                                                                                                                                 |       |
| Variables                    | 7       | Clearly define all outcomes, exposures, predictors, potential confounders, and effect modifiers. Give diagnostic criteria, if applicable                                                                                                                                                                                                                                                                                                                               | 6-8   |
| Data sources/<br>measurement | 8*      | For each variable of interest, give sources of data and details of methods of assessment (measurement). Describe comparability of assessment methods if there is more than one group                                                                                                                                                                                                                                                                                   | 6-8   |
| Bias                         | 9       | Describe any efforts to address potential sources of bias                                                                                                                                                                                                                                                                                                                                                                                                              | 14    |
| Study size                   | 10      | Explain how the study size was arrived at                                                                                                                                                                                                                                                                                                                                                                                                                              | 9     |
| Quantitative variables       | 11      | Explain how quantitative variables were handled in the analyses. If applicable, describe which groupings were chosen and why                                                                                                                                                                                                                                                                                                                                           | N/A   |
| Statistical methods          | 12      | (a) Describe all statistical methods, including those used to control for confounding                                                                                                                                                                                                                                                                                                                                                                                  | 6-8   |
|                              |         | (b) Describe any methods used to examine subgroups and interactions                                                                                                                                                                                                                                                                                                                                                                                                    | N/A   |

|                          |     |                                                                                                                                                                                                                                                                                                           |       |
|--------------------------|-----|-----------------------------------------------------------------------------------------------------------------------------------------------------------------------------------------------------------------------------------------------------------------------------------------------------------|-------|
|                          |     | (c) Explain how missing data were addressed                                                                                                                                                                                                                                                               | N/A   |
|                          |     | (d) <i>Cohort study</i> —If applicable, explain how loss to follow-up was addressed<br><i>Case-control study</i> —If applicable, explain how matching of cases and controls was addressed<br><i>Cross-sectional study</i> —If applicable, describe analytical methods taking account of sampling strategy | N/A   |
|                          |     | (e) Describe any sensitivity analyses                                                                                                                                                                                                                                                                     | N/A   |
| <b>Results</b>           |     |                                                                                                                                                                                                                                                                                                           |       |
| Participants             | 13* | (a) Report numbers of individuals at each stage of study—eg numbers potentially eligible, examined for eligibility, confirmed eligible, included in the study, completing follow-up, and analysed                                                                                                         | 6-8   |
|                          |     | (b) Give reasons for non-participation at each stage                                                                                                                                                                                                                                                      |       |
|                          |     | (c) Consider use of a flow diagram                                                                                                                                                                                                                                                                        |       |
| Descriptive data         | 14* | (a) Give characteristics of study participants (eg demographic, clinical, social) and information on exposures and potential confounders                                                                                                                                                                  | 9     |
|                          |     | (b) Indicate number of participants with missing data for each variable of interest                                                                                                                                                                                                                       |       |
|                          |     | (c) <i>Cohort study</i> —Summarise follow-up time (eg, average and total amount)                                                                                                                                                                                                                          |       |
| Outcome data             | 15* | <i>Cohort study</i> —Report numbers of outcome events or summary measures over time                                                                                                                                                                                                                       | 9-11  |
|                          |     | <i>Case-control study</i> —Report numbers in each exposure category, or summary measures of exposure                                                                                                                                                                                                      |       |
|                          |     | <i>Cross-sectional study</i> —Report numbers of outcome events or summary measures                                                                                                                                                                                                                        |       |
| Main results             | 16  | (a) Give unadjusted estimates and, if applicable, confounder-adjusted estimates and their precision (eg, 95% confidence interval). Make clear which confounders were adjusted for and why they were included                                                                                              | N/A   |
|                          |     | (b) Report category boundaries when continuous variables were categorized                                                                                                                                                                                                                                 |       |
|                          |     | (c) If relevant, consider translating estimates of relative risk into absolute risk for a meaningful time period                                                                                                                                                                                          |       |
| Other analyses           | 17  | Report other analyses done—eg analyses of subgroups and interactions, and sensitivity analyses                                                                                                                                                                                                            | 10-11 |
| <b>Discussion</b>        |     |                                                                                                                                                                                                                                                                                                           |       |
| Key results              | 18  | Summarise key results with reference to study objectives                                                                                                                                                                                                                                                  | 12-13 |
| Limitations              | 19  | Discuss limitations of the study, taking into account sources of potential bias or imprecision. Discuss both direction and magnitude of any potential bias                                                                                                                                                | 14    |
| Interpretation           | 20  | Give a cautious overall interpretation of results considering objectives, limitations, multiplicity of analyses, results from similar studies, and other relevant evidence                                                                                                                                | 13-14 |
| Generalisability         | 21  | Discuss the generalisability (external validity) of the study results                                                                                                                                                                                                                                     | 13-14 |
| <b>Other information</b> |     |                                                                                                                                                                                                                                                                                                           |       |

|         |    |                                                                                                                                                               |    |
|---------|----|---------------------------------------------------------------------------------------------------------------------------------------------------------------|----|
| Funding | 22 | Give the source of funding and the role of the funders for the present study and, if applicable, for the original study on which the present article is based | 23 |
|---------|----|---------------------------------------------------------------------------------------------------------------------------------------------------------------|----|

\*Give information separately for cases and controls in case-control studies and, if applicable, for exposed and unexposed groups in cohort and cross-sectional studies.

**Note:** An Explanation and Elaboration article discusses each checklist item and gives methodological background and published examples of transparent reporting. The STROBE checklist is best used in conjunction with this article (freely available on the Web sites of PLoS Medicine at <http://www.plosmedicine.org/>, Annals of Internal Medicine at <http://www.annals.org/>, and Epidemiology at <http://www.epidem.com/>). Information on the STROBE Initiative is available at [www.strobe-statement.org](http://www.strobe-statement.org).

For peer review only
