# Supplementary material for: Epidemiological investigation of the first 5685 cases of SARS-CoV-2 infection in Qatar, 28 February–18 April 2020
Source: PubMed Central journal article supplement — BMJ Open. 2020 Oct 7;10(10):e040428. doi: 10.1136/bmjopen-2020-040428 (PMC7542927; doi:10.1136/bmjopen-2020-040428), 2020-10-07
Supplement: bmjopen-2020-040428supp003.pdf [file bmjopen-2020-040428supp003.pdf]

Supplementary table 2. Factors associated with severe or critical illness after excluding those with missing severity of illness data (multivariable logistic regression model).

| Variables                           | Odds Ratio | [95% Conf. Interval] |      | P-value |
|-------------------------------------|------------|----------------------|------|---------|
| Age                                 |            |                      |      |         |
| 0-20 years (reference)              | reference  |                      |      |         |
| 21-40 years                         | 1.51       | 0.46                 | 4.93 | 0.62    |
| 41-60 years                         | 1.57       | 0.45                 | 5.43 | 0.55    |
| 60+ years                           | 1.40       | 0.30                 | 6.55 | 0.94    |
| Male gender                         | 0.98       | 0.53                 | 1.83 | 0.95    |
| Qatari nationality (vs. non-Qatari) | 0.83       | 0.43                 | 1.60 | 0.58    |
| Hypertension                        | 3.48       | 1.82                 | 6.66 | 0.0002  |
| Diabetes mellitus                   | 3.14       | 1.74                 | 5.65 | 0.0001  |
| Cardiovascular disease              | 0.55       | 0.24                 | 1.22 | 0.14    |
| Chronic lung disease                | 1.65       | 0.79                 | 3.43 | 0.19    |
| Chronic kidney disease              | 1.31       | 0.41                 | 4.21 | 0.65    |
| Cancer                              | 1.25       | 0.28                 | 5.65 | 0.77    |
