# Supplementary material for: Epidemiological investigation of the first 5685 cases of SARS-CoV-2 infection in Qatar, 28 February–18 April 2020
Source: PubMed Central journal article supplement — BMJ Open. 2020 Oct 7;10(10):e040428. doi: 10.1136/bmjopen-2020-040428 (PMC7542927; doi:10.1136/bmjopen-2020-040428), 2020-10-07
Supplement: bmjopen-2020-040428supp004.pdf [file bmjopen-2020-040428supp004.pdf]

Supplementary table 3. Factors associated with severe or critical illness by number of comorbidities (multivariable logistic regression model).

| <b>Variables</b>                    | <b>Odds Ratio</b> | <b>[95% Conf. Interval]</b> |       | <b>P-value</b> |
|-------------------------------------|-------------------|-----------------------------|-------|----------------|
| Age                                 |                   |                             |       |                |
| 0-20 years (reference)              |                   |                             |       |                |
| 21-40 years                         | 1.42              | 0.43                        | 4.67  | 0.75           |
| 41-60 years                         | 1.49              | 0.43                        | 5.19  | 0.65           |
| 60+ years                           | 1.44              | 0.31                        | 6.66  | 0.84           |
| Male gender                         | 0.96              | 0.51                        | 1.78  | 0.89           |
| Qatari nationality (vs. non-Qatari) | 0.83              | 0.43                        | 1.58  | 0.57           |
| Number of comorbidities             |                   |                             |       |                |
| 0 (reference)                       |                   |                             |       |                |
| Any 1                               | 5.43              | 3.41                        | 8.63  | 0.01           |
| 3 or more                           | 6.16              | 3.35                        | 11.32 | 0.01           |
