# Supplementary figures and images for: Epidemiological investigation of the first 5685 cases of SARS-CoV-2 infection in Qatar, 28 February–18 April 2020
Source: PubMed Central journal article supplement — BMJ Open. 2020 Oct 7;10(10):e040428. doi: 10.1136/bmjopen-2020-040428 (PMC7542927; doi:10.1136/bmjopen-2020-040428), 2020-10-07

Supplementary figure. Number of tests done and number of persons who tested positive per day.

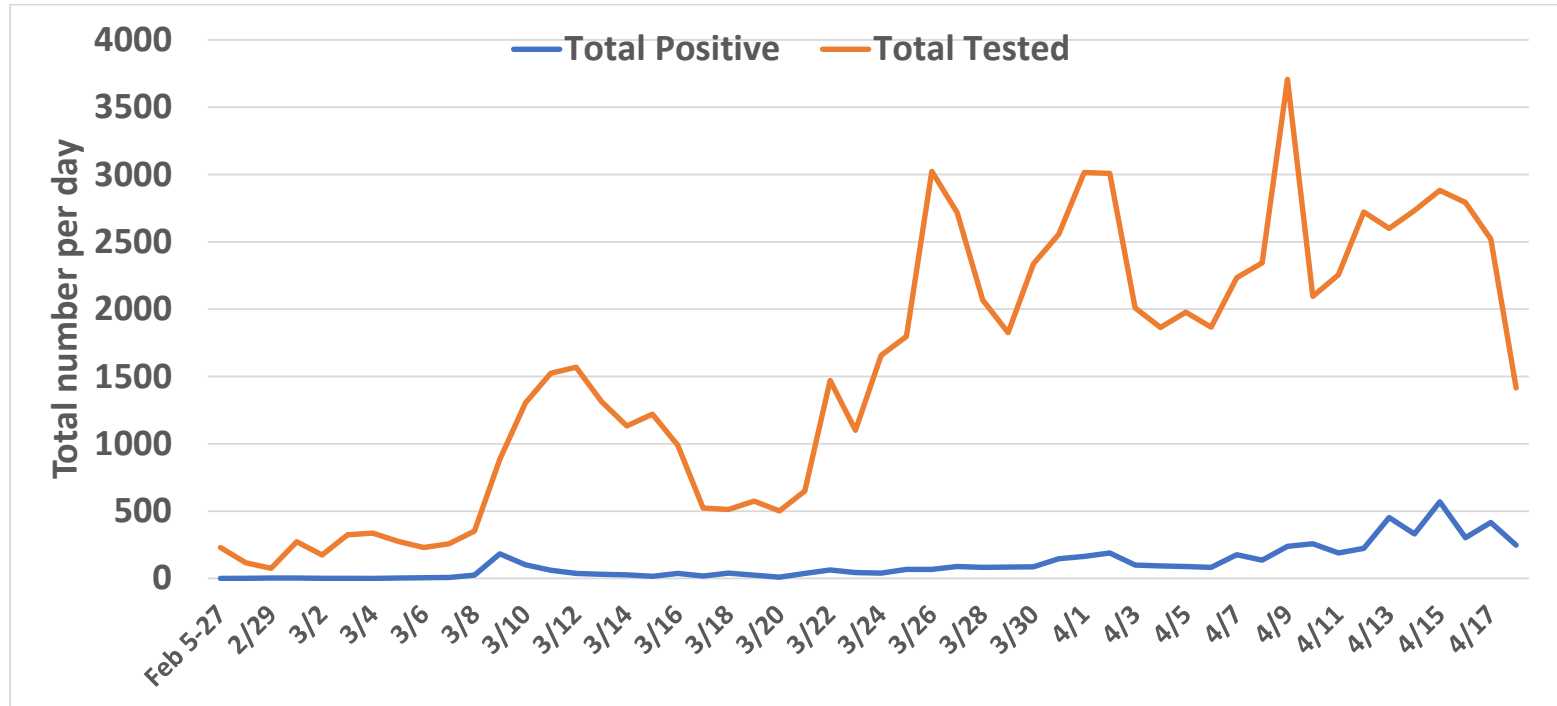

Supplement: bmjopen-2020-040428supp001.pdf [file bmjopen-2020-040428supp001.pdf]
